# Supplementary material for: Ruthenium(iv) porphyrin catalyzed phosphoramidation of aldehydes with phosphoryl azides as a nitrene source
Source: Royal Society of Chemistry journal article supplement (doi:10.1039/c2cc31686b), 2012-01-01

## Supplementary Information

### Ruthenium(IV) porphyrin catalyzed phosphoramidation of aldehyde with phosphoryl azide as nitrene source

Wenbo Xiao, Cong-Ying Zhou and Chi-Ming Che\*

*Department of Chemistry, State Key Laboratory of Synthetic Chemistry, and Open Laboratory of Chemical Biology of the Institute of Molecular Technology for Drug Discovery and Synthesis, The University of Hong Kong, Pokfulam Road, Hong Kong, China.*

Fax: (852) 2857-1586 Tel: (852) 2859-2154 E-mail: [cmche@hku.hk](mailto:cmche@hku.hk)

|                                                                                                                                                |            |
|------------------------------------------------------------------------------------------------------------------------------------------------|------------|
| <b>Table of contents</b>                                                                                                                       | <b>S1</b>  |
| <b>I. General Information</b>                                                                                                                  | <b>S2</b>  |
| <b>II. Synthesis of Ruthenium(IV) Porphyrins</b>                                                                                               | <b>S2</b>  |
| <b>III. Synthesis of Phosphoryl Azides</b>                                                                                                     | <b>S2</b>  |
| <b>IV. General procedure for the phosphoramidation of aldehyde with<br/>phosphoryl azide catalyzed by [Ru<sup>IV</sup>(TTP)Cl<sub>2</sub>]</b> | <b>S4</b>  |
| <b>V. Procedure for the Scale-up Synthesis</b>                                                                                                 | <b>S4</b>  |
| <b>VI. Kinetic Isotope Effect Experiment</b>                                                                                                   | <b>S5</b>  |
| <b>VII. Characterizations of Products</b>                                                                                                      | <b>S6</b>  |
| <b>NMR Spectra</b>                                                                                                                             | <b>S20</b> |

## I. General Information

Unless otherwise stated, all reactions were performed under argon atmosphere. DPPA and aldehydes were obtained commercially and used without further purification unless acid impurities were identified in aldehydes. Molecular sieves were dried at 400°C for 3 h prior to use. All solvents were purified by distillation using standard methods. Metal porphyrins and organic azides were synthesized according to previously reported methods. All  $^1\text{H}$  NMR and  $^{13}\text{C}$  NMR spectra were recorded on Bruker AV300 or AV400 NMR spectrometers with tetramethylsilane (TMS) as internal reference.  $^{31}\text{P}$  NMR spectra were recorded on Bruker AV400 NMR spectrometer with 85%  $\text{H}_3\text{PO}_4$  as external reference. Mass spectra were recorded on Finnigan MAT 95 mass spectrometer. Elemental analysis was conducted on Flash EA 1112 analyzer by Analysis & Test Center of Institute of Chemistry of Chinese Academy of Sciences. *Caution!* Organic azides are potentially explosive and should be handled with great care.

## II. Synthesis of Ruthenium(IV) Porphyrins

Ruthenium(IV) porphyrins were synthesized according to the following references.

$[\text{Ru}^{\text{IV}}(\text{TDCPP})\text{Cl}_2]$  J.-L. Zhang and C.-M. Che, *Chem. Eur. J.*, 2005, **11**, 3899.

---

$[\text{Ru}^{\text{IV}}(\text{TTP})\text{Cl}_2]$  W.-H., Leung, T. S. M. Hun, H.-w. Hou, K.-Y. Wong, *J. Chem. Soc., Dalton Trans.* 1997, 237.

## III. Synthesis of Phosphoryl Azides

Dimethyl phosphorazidate **3b**, diethyl phosphorazidate **3c** and bis(2, 2, 2-trichloroethyl) phosphorazidate **3d** were prepared according to the literature with minor modification.

### General procedure for the synthesis of phosphoryl azides:

To a stirred solution of phosphorochloridate (3 mmol) in acetone (20 mL), was added sodium azide (4.5 mmol) in one portion at room temperature. The reaction mixture was stirred for 3h, during this period white solid precipitated. Then the mixture was filtered through a short celite, washed with 20ml of acetone. The filtrate was dried by a rotary evaporator at room temperature with a foil cover on the flask to prevent from light. The residue was purified by column chromatography (silica gel, DCM) to give pure product.

### Bis(2, 2, 2-trichloroethyl) phosphorazidate **3d**

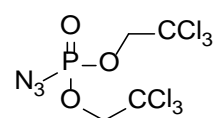

White solid, 78% yield.

$^1\text{H}$  NMR ( $\text{CDCl}_3$ , 400MHz):  $\delta$  4.71-4.65(m, 4H);  $^{13}\text{C}$  NMR ( $\text{CDCl}_3$ , 100MHz):

$\delta$  94.2, 94.1, 77.5, 77.5;  $^{31}\text{P}$  NMR ( $\text{CDCl}_3$ , 162MHz):  $\delta$  -2.3(s); HRMS(EI) m/z

Calcd. for  $\text{C}_4\text{H}_4\text{Cl}_6\text{N}_3\text{O}_3\text{P}$   $[\text{M}]^+$  382.8121, found 382.8103.

References for the synthesis of phosphoryl azides:

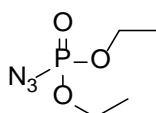

**3c**

S. H. Kim, D. Y. Jung and S. Chang, *J. Org. Chem.*,  
2007, **72**, 9769

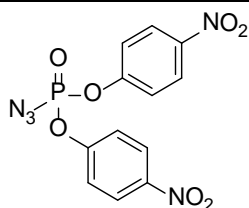

**3e**

T. Shioiri and S. Yamada, *Chem. Pharm. Bull.*, 1974,  
**22**, 855

#### IV. General procedure for the phosphoramidation of aldehyde with phosphoryl azide catalyzed by $[\text{Ru}^{\text{IV}}(\text{TTP})\text{Cl}_2]$

To an oven-dried schlenk flask with a rubber seal was added aldehyde (0.2mmol), DPPA (0.24 mmol), 3ÅMS (25 mg) and  $[\text{Ru}^{\text{IV}}(\text{TTP})\text{Cl}_2]$  (5 mmol%). The flask was evacuated and backfilled with argon three times. Freshly distilled dichloromethane (1 mL) was added via syringe. The reaction mixture was stirred under reflux for 12h. After cooled down to room temperature, the reaction mixture was filtered through a short celite. The filtrate was concentrated by a rotary evaporator and purified by column chromatography (silica gel, DCM) to give pure product.

#### V. Procedure for the Scale-up Synthesis

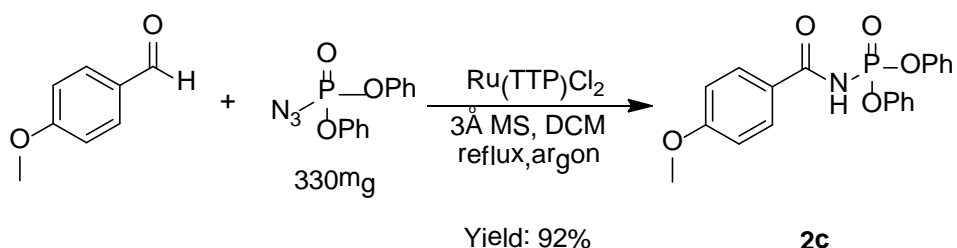

To an oven-dried schlenk flask was added  $[\text{Ru}^{\text{IV}}(\text{TTP})\text{Cl}_2]$  (42 mg, 0.05 mmol, 5 mol%) and 125 mg of 3Å molecular sieve. The sealed flask was degassed for 20min and backfilled with argon. The freshly distilled DCM (3 mL) and *p*-anisaldehyde (136 mg, 1 mmol, 1 equiv.) were added via syringe. The mixture was heated to reflux. A solution of DPPA (330 mg, 1.2 mmol, 1.2 equiv.) in 2.5 mL of DCM was added dropwise via syringe pump within 5h. After addition, the reaction mixture was stirred for another 7h. Then the reaction mixture was concentrated by a rotary evaporator and the residue was purified by column chromatography to give the pure product **2c** in 92% yield.

## VI. Kinetic Isotope Effect Experiment

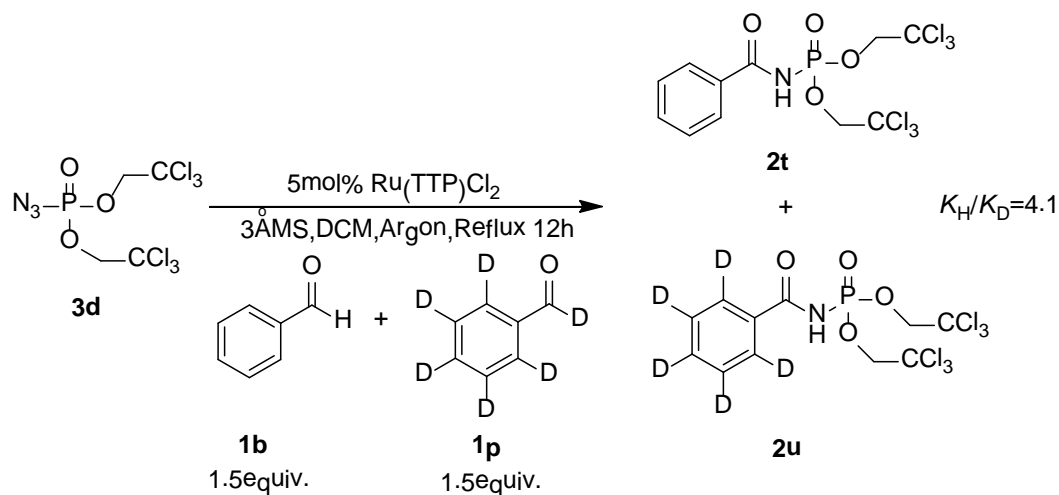

To an oven-dried schlenk flask with a rubber seal was added bis(2,2,2-trichloroethyl) phosphorazidate **3d** (77 mg, 0.2 mmol), [Ru<sup>IV</sup>(TTP)Cl<sub>2</sub>] (8.4 mg, 0.01 mmol, 5 mol%) and 50 mg of 3 Å molecular sieve. The flask was evacuated and backfilled with argon three times. Then benzaldehyde **1b** (32 mg, 0.3 mmol) and benzaldehyde-*d*<sub>6</sub> **1p** (34 mg, 0.3 mmol) were added. The reaction mixture was stirred under reflux for 12h. Upon the completion of the reaction, the mixture was allowed to cool and purified by a column chromatography (silica gel, hexane:EA=3:1) to give a mixture of bis(2,2,2-trichloroethyl) benzoylphosphoramidate **2t** and bis(2,2,2-trichloroethyl) benzoylphosphoramidate-*d*<sub>5</sub> **2u** (the labile D of N-D was replaced by H during purification). The ratio of  $k_H/k_D$  was determined by <sup>1</sup>H NMR.

## VII. Characterizations of Products

### Diphenyl (4-methylbenzoyl)phosphoramidate 2a

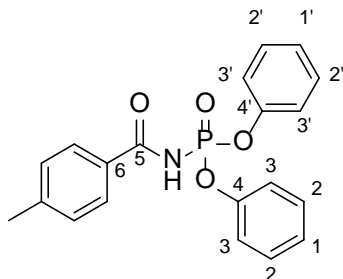

$^1\text{H}$  NMR ( $\text{CDCl}_3$ , 400MHz):  $\delta$ 9.49(d, 1H, NH,  $J_{\text{H-P}}=10.3\text{Hz}$ ), 7.86(d, 2H,  $J=7.8\text{Hz}$ ), 7.25-7.22(m, 8H), 7.18(d, 2H,  $J=7.9\text{Hz}$ ), 7.14-7.11(m, 2H), 2.38(s, 3H);  $^{13}\text{C}$  NMR ( $\text{CDCl}_3$ , 100MHz):  $\delta$ 167.5(d, C5,  $J_{\text{C-P}}=3.6\text{Hz}$ ), 150.2(C4 or C4'), 150.1(C4 or C4'), 143.8, 129.8(C2 & C2'), 129.5(d, C6,  $J_{\text{C-P}}=11.4\text{Hz}$ ), 129.3, 128.5, 125.6(C1 & C1'), 120.7(C3 or C3'), 120.6(C3 or C3'), 21.7;  $^{31}\text{P}$  NMR ( $\text{CDCl}_3$ , 162MHz):  $\delta$ -9.1(d,  $J_{\text{P-H}}=10.3\text{Hz}$ ).

HRMS(EI)  $m/z$  Calcd. for  $\text{C}_{20}\text{H}_{18}\text{NO}_4\text{P}$   $[\text{M}]^+$  367.0973, found 367.0957.

### Diphenylbenzoylphosphoramidate 2b

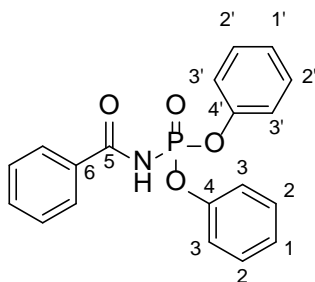

$^1\text{H}$  NMR ( $\text{CDCl}_3$ , 400MHz):  $\delta$ 9.62(d, 1H, NH,  $J_{\text{H-P}}=9.6\text{Hz}$ ), 7.97(d, 2H,  $J=8.6\text{Hz}$ ), 7.54(t, 1H,  $J=7.4\text{Hz}$ ), 7.39(t, 2H,  $J=7.8\text{Hz}$ ), 7.25(m, 8H), 7.17-7.11(m, 2H);  $^{13}\text{C}$  NMR ( $\text{CDCl}_3$ , 100MHz):  $\delta$ 167.6(d, C5,  $J_{\text{C-P}}=3.4\text{Hz}$ ), 150.2(C4 or C4'), 150.1(C4 or C4'), 133.1, 132.3(d, C6,  $J_{\text{C-P}}=11.2\text{Hz}$ ), 129.8(C2 & C2'), 128.6, 128.5,

125.7(C1 & C1'), 120.6(C3 or C3'), 120.6(C3 or C3');  $^{31}\text{P}$  NMR (CDCl<sub>3</sub>,162MHz):  $\delta$ -9.1(d,  $J_{\text{P-H}}$ =9.6Hz).

HRMS(EI) m/z Calcd. for C<sub>19</sub>H<sub>16</sub>NO<sub>4</sub>P [M]<sup>+</sup> 353.0817, found 353.0810.

Anal. Calcd. for C<sub>19</sub>H<sub>16</sub>NO<sub>4</sub>P: C, 64.59; H, 4.56; N, 3.96. Found: C, 64.59; H, 4.52; N, 3.92.

### Diphenyl (4-methoxybenzoyl)phosphoramidate 2c

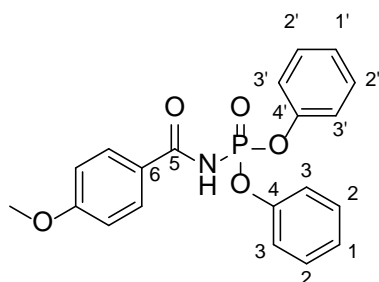

$^1\text{H}$  NMR (CDCl<sub>3</sub>,400MHz):  $\delta$ 8.79(d, 1H, NH,  $J_{\text{H-P}}$ =10.3Hz), 7.90(d, 2H,  $J$ =8.9Hz), 7.28-7.26(m, 8H), 7.17-7.13(m, 2H), 6.88(d, 2H,  $J$ =8.9Hz), 3.85(s, 3H);  $^{13}\text{C}$  NMR (CDCl<sub>3</sub>,100MHz):  $\delta$ 167.0(d, C5,  $J_{\text{C-P}}$ =3.2Hz), 163.5 (C-OMe), 150.3(C4 or C4'), 150.2(C4 or C4'), 131.1, 129.8(C2 & C2'), 125.6(C1 & C1'), 124.6(d, C6,  $J_{\text{C-P}}$ =11.3Hz), 120.7(C3 or C3'), 120.6(C3 or C3'), 113.8, 55.6;  $^{31}\text{P}$  NMR (CDCl<sub>3</sub>,162MHz):  $\delta$ -8.8(d,  $J_{\text{P-H}}$ =10.3Hz).

HRMS(EI) m/z Calcd. for C<sub>20</sub>H<sub>18</sub>NO<sub>5</sub>P [M]<sup>+</sup> 383.0923, found 383.0912.

Anal. Calcd. for C<sub>20</sub>H<sub>18</sub>NO<sub>5</sub>P : C, 62.66; H, 4.73; N, 3.65. Found: C, 62.07; H, 4.71; N, 3.74.

### Diphenyl (4-hydroxybenzoyl)phosphoramidate 2d

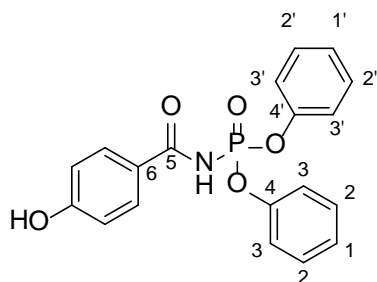

$^1\text{H}$  NMR ( $d_6$ -DMSO, 400 MHz):  $\delta$  10.41(s, 1H), 10.37(s, 1H), 7.87(d, 2H,  $J=8.4\text{Hz}$ ), 7.45(t, 4H,  $J=7.3\text{Hz}$ ), 7.29-7.27(m, 6H), 6.85(d, 2H,  $J=7.9\text{Hz}$ );  $^{13}\text{C}$  NMR ( $d_6$ -Acetone, 100 MHz):  $\delta$  167.5 (C5), 162.7 (C-OH), 151.5(C4 or C4'), 151.4(C4 or C4'), 131.4, 130.6(C2 & C2'), 126.2(C1 & C1'), 124.8(d, C6,  $J_{\text{C-P}}=11.1\text{Hz}$ ), 121.5(C3 or C3'), 121.4(C3 or C3'), 116.1;  $^{31}\text{P}$  NMR ( $\text{CDCl}_3$ , 162 MHz):  $\delta$  -9.7(s).

HRMS(EI)  $m/z$  Calcd. for  $\text{C}_{19}\text{H}_{16}\text{NO}_5\text{P}$   $[\text{M}]^+$  369.0766, found 369.0748.

Anal. Calcd. for  $\text{C}_{19}\text{H}_{16}\text{NO}_5\text{P}$ : C, 61.79; H, 4.37; N, 3.79. Found: C, 61.78; H, 4.39; N, 3.73.

### Diphenylbenzo[d][1,3]dioxole-5-carbonylphosphoramidate 2e

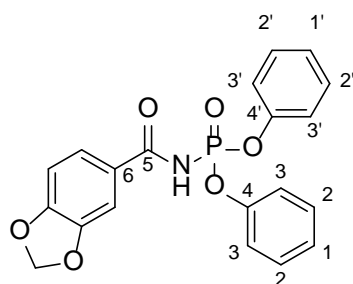

$^1\text{H}$  NMR ( $\text{CDCl}_3$ , 400 MHz):  $\delta$  9.58(d, 1H, NH,  $J_{\text{H-P}}=10.1\text{Hz}$ ), 7.56(dd, 1H,  $J=8.2$ , 1.8 Hz), 7.50(d, 1H,  $J=1.7\text{Hz}$ ), 7.25-7.21(m, 8H), 7.15-7.13(m, 2H), 6.72(d, 1H,  $J=8.2\text{Hz}$ ), 6.02(s, 2H);  $^{13}\text{C}$  NMR ( $\text{CDCl}_3$ , 100 MHz):  $\delta$  166.7(d, C5,  $J_{\text{C-P}}=3.1\text{Hz}$ ), 151.7(C-O-dioxolane), 150.2(C4 or C4'), 150.1(C4 or C4'), 148.1(C-O-dioxolane), 129.8(C2 & C2'), 126.3(d, C6,  $J_{\text{C-P}}=11.3\text{Hz}$ ), 125.7(C1 & C1'), 124.3,



120.6(C3 or C3'), 120.6(C3 or C3'), 108.8, 108.1, 101.9(O-CH<sub>2</sub>-O); <sup>31</sup>P NMR (CDCl<sub>3</sub>,162MHz): δ-9.0(d, *J*<sub>P-H</sub>=9.9Hz).

HRMS(EI) *m/z* Calcd. for C<sub>20</sub>H<sub>16</sub>NO<sub>6</sub>P [M]<sup>+</sup> 397.0715, found 397.0708.

### Diphenyl(4-chlorobenzoyl)phosphoramidate 2f

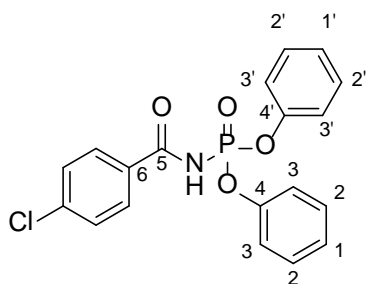

<sup>1</sup>H NMR (CDCl<sub>3</sub>,400MHz): δ9.65(d, 1H, NH, *J*<sub>H-P</sub>=10.1Hz), 7.88(d, 2H, *J*=8.6Hz), 7.32(d, 2H, *J*=8.5Hz), 7.27-7.19(m, 8H), 7.15-7.13(m, 2H); <sup>13</sup>C NMR (CDCl<sub>3</sub>,75MHz): δ166.6(d, C5, *J*<sub>C-P</sub>=3.3Hz), 150.2(C4 or C4'), 150.1(C4 or C4'), 139.6(C-Cl), 130.6(d, C6, *J*<sub>C-P</sub>=11.4Hz), 130.0, 129.9(C2 & C2'), 128.9, 125.8(C1 or C1'), 125.8(C1 or C1'), 120.6(C3 or C3'), 120.5(C3 or C3'); <sup>31</sup>P NMR (CDCl<sub>3</sub>,162MHz): δ-9.2(d, *J*<sub>P-H</sub>=9.9Hz).

HRMS(EI) *m/z* Calcd. for C<sub>19</sub>H<sub>15</sub>ClNO<sub>4</sub>P [M]<sup>+</sup> 387.0427 , found 387.0417.

Anal. Calcd. for C<sub>19</sub>H<sub>15</sub>ClNO<sub>4</sub>P: C, 58.85; H, 3.90; N, 3.61. Found: C, 58.38; H, 3.84; N, 3.68.

### Diphenyl (4-nitrobenzoyl)phosphoramidate 2g

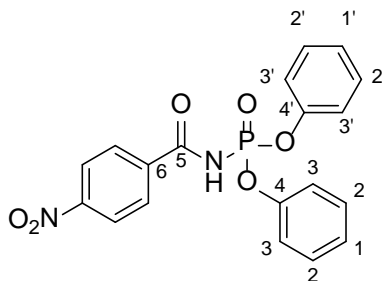

$^1\text{H}$  NMR ( $\text{CDCl}_3$ , 400MHz):  $\delta$ 10.22(d, 1H, NH,  $J_{\text{H-P}}=9.4\text{Hz}$ ), 8.16(d, 2H,  $J=8.6\text{Hz}$ ), 8.11(d, 2H,  $J=8.8\text{Hz}$ ), 7.28(t, 4H,  $J=7.9\text{Hz}$ ), 7.20-7.16(m, 6H);  $^{13}\text{C}$  NMR ( $\text{CDCl}_3$ , 75MHz):  $\delta$ 166.2 (d, C5,  $J_{\text{C-P}}=3.2\text{Hz}$ ), 150.9(C-NO<sub>2</sub>), 150.5(C4 or C4'), 150.4(C4 or C4'), 137.8(d, C6,  $J_{\text{C-P}}=11.7\text{Hz}$ ), 130.4(C2 & C2'), 130.2, 126.5(C1 or C1'), 126.5(C1 or C1'), 124.2, 120.9(C3 or C3'), 120.9(C3 or C3');  $^{31}\text{P}$  NMR ( $\text{CDCl}_3$ , 162MHz):  $\delta$ -9.7(d,  $J_{\text{P-H}}=9.4\text{Hz}$ ).

HRMS(EI)  $m/z$  Calcd. for  $\text{C}_{19}\text{H}_{15}\text{N}_2\text{O}_6\text{P}$   $[\text{M}]^+$  398.0668, found 398.0658.

Anal. Calcd. for  $\text{C}_{19}\text{H}_{15}\text{N}_2\text{O}_6\text{P}$ : C, 57.29; H, 3.80; N, 7.03. Found: C, 57.30; H, 3.87; N, 6.94.

### Diphenyl 2-naphthoylphosphoramidate 2h

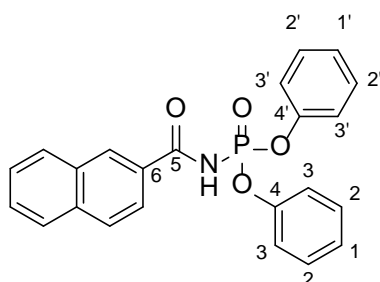

$^1\text{H}$  NMR ( $\text{CDCl}_3$ , 400MHz):  $\delta$ 10.00(d, 1H, NH,  $J_{\text{H-P}}=10.2\text{Hz}$ ), 8.61(s, 1H), 8.06(dd, 1H,  $J=8.6, 1.7\text{Hz}$ ), 7.85(d, 1H,  $J=8.0\text{Hz}$ ), 7.84(d, 1H,  $J=8.6\text{Hz}$ ), 7.72(d, 1H,  $J=8.0\text{Hz}$ ), 7.58(t, 1H,  $J=7.0\text{Hz}$ ), 7.49(t, 1H,  $J=7.1\text{Hz}$ ), 7.27-7.15(m, 8H), 7.08(t, 2H,  $J=7.1\text{Hz}$ );  $^{13}\text{C}$  NMR ( $\text{CDCl}_3$ , 100MHz):  $\delta$ 167.8(d, C5,  $J_{\text{C-P}}=3.4\text{Hz}$ ), 150.2(C4 or C4'), 150.1(C4 or C4'), 135.5, 132.5, 129.9, 129.8(C2 & C2'), 129.6, 129.4(d, C6,  $J_{\text{C-P}}=11.2\text{Hz}$ ), 128.5, 128.4, 127.7, 126.8, 125.6(C1 & C1'), 124.5, 120.7(C3 or C3'), 120.6(C3 or C3');  $^{31}\text{P}$  NMR ( $\text{CDCl}_3$ , 162MHz):  $\delta$ -8.8(d,  $J_{\text{P-H}}=9.9\text{Hz}$ ).

HRMS(EI)  $m/z$  Calcd. for  $\text{C}_{23}\text{H}_{18}\text{NO}_4\text{P}$   $[\text{M}]^+$  403.0973, found 403.0964.

### Diphenyl furan-2-carbonylphosphoramidate 2i

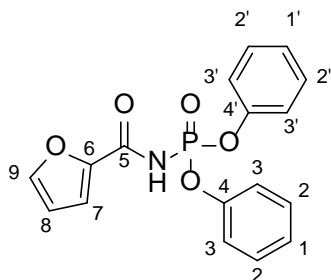

$^1\text{H}$  NMR ( $\text{CDCl}_3$ , 400 MHz):  $\delta$  8.71(d, 1H, NH,  $J_{\text{H-P}}=10.3\text{Hz}$ ), 7.48(dd, 1H, H9,  $J_{\text{H9-H8}}=1.7\text{Hz}$ ,  $J_{\text{H9-H7}}=0.7\text{Hz}$ ), 7.31(d, 1H, H7,  $J_{\text{H7-H8}}=3.6\text{Hz}$ ), 7.28-7.26(m, 8H), 7.18-7.15(m, 2H), 6.48(dd, 1H, H8,  $J_{\text{H8-H9}}=1.7\text{Hz}$ ,  $J_{\text{H8-H7}}=3.6\text{Hz}$ );  $^{13}\text{C}$  NMR ( $\text{CDCl}_3$ , 100 MHz):  $\delta$  165.4 (C5), 157.4 (C6), 150.1(C4 or C4'), 150.0(C4 or C4'), 146.1(C9), 129.8(C2 & C2'), 125.7(C1 & C1'), 120.6(C3 or C3'), 120.6(C3 or C3'), 117.7(C7), 112.7(C8);  $^{31}\text{P}$  NMR ( $\text{CDCl}_3$ , 162 MHz):  $\delta$  -10.7(d,  $J_{\text{P-H}}=10.1\text{Hz}$ ).

HRMS(EI)  $m/z$  Calcd. for  $\text{C}_{17}\text{H}_{14}\text{NO}_5\text{P}$   $[\text{M}]^+$  343.0610, found 343.0599.

Anal. Calcd. for  $\text{C}_{17}\text{H}_{14}\text{NO}_5\text{P}$ : C, 59.48; H, 4.11; N, 4.08. Found: C, 59.54; H, 4.12; N, 4.03.

### Diphenylcinnamoylphosphoramidate 2j

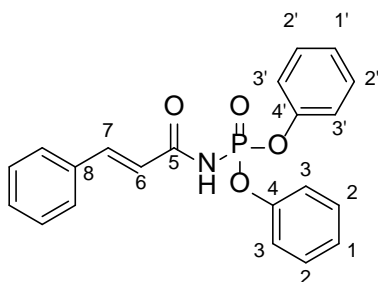

$^1\text{H}$  NMR ( $\text{CDCl}_3$ , 400 MHz):  $\delta$  9.21(d, 1H, NH,  $J_{\text{H-P}}=11.5\text{Hz}$ ), 7.73(d, 1H,  $J_{\text{trans}}=15.8\text{Hz}$ ), 7.46(d, 1H,  $J=7.12\text{Hz}$ ), 7.45(d, 1H,  $J=7.64\text{Hz}$ ), 7.39-7.36(m, 3H), 7.28-7.23(m, 8H), 7.15-7.14(m, 2H), 6.46(d, 1H,  $J_{\text{trans}}=15.7\text{Hz}$ );  $^{13}\text{C}$  NMR ( $\text{CDCl}_3$ , 100 MHz):  $\delta$  166.4 (C5), 150.1(C4 or C4'), 150.0(C4 or C4'), 144.8 (C7), 134.2(C8), 130.6, 129.9(C2 & C2'), 129.0, 128.4, 125.8(C1 & C1'), 120.6(C3 or

C3'), 120.6(C3 or C3'), 119.4(d, C6,  $J_{C-P}=12.9\text{Hz}$ );  $^{31}\text{P}$  NMR ( $\text{CDCl}_3$ , 162MHz):  $\delta$ -8.8(d,  $J_{P-H}=11.2\text{Hz}$ ).

HRMS(EI) m/z Calcd. for  $\text{C}_{21}\text{H}_{18}\text{NO}_4\text{P}$   $[\text{M}]^+$  379.0973, found 379.0956.

Anal. Calcd. for  $\text{C}_{21}\text{H}_{18}\text{NO}_4\text{P}$ : C, 66.49; H, 4.78; N, 3.69. Found: C, 66.46; H, 4.76; N, 3.68.

### Diphenyl (3-methylbut-2-enoyl)phosphoramidate 2k

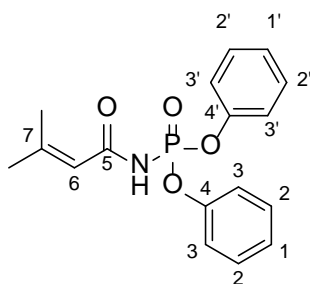

$^1\text{H}$  NMR ( $\text{CDCl}_3$ , 400MHz):  $\delta$ 8.66(d, 1H, NH,  $J_{H-P}=11.3\text{Hz}$ ), 7.31-7.21(m, 8H), 7.19-7.15(m, 2H), 5.61(s, 1H), 2.17(s, 3H), 1.83(s, 3H);  $^{13}\text{C}$  NMR ( $\text{CDCl}_3$ , 100MHz):  $\delta$ 166.3(d, C5,  $J_{C-P}=2.6\text{Hz}$ ), 158.4(d, C7,  $J_{C-P}=2.4\text{Hz}$ ), 150.2(C4 or C4'), 150.1(C4 or C4'), 129.8(C2 & C2'), 125.6(C1 & C1'), 120.7(C3 or C3'), 120.6(C3 or C3'), 117.3(d, C6,  $J_{C-P}=12.9\text{Hz}$ ), 27.7, 20.5;  $^{31}\text{P}$  NMR ( $\text{CDCl}_3$ , 162MHz):  $\delta$ -9.1(d,  $J_{P-H}=11.8\text{Hz}$ ).

HRMS(EI) m/z Calcd. for  $\text{C}_{17}\text{H}_{18}\text{NO}_4\text{P}$   $[\text{M}]^+$  331.0973, found 331.0964.

### Diphenyl (5,6-dihydro-2H-pyran-3-carbonyl)phosphoramidate 2l

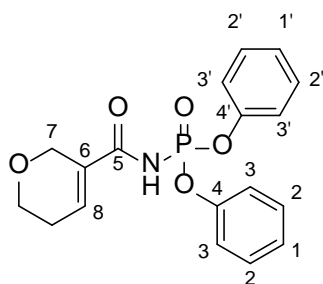

$^1\text{H}$  NMR ( $\text{CDCl}_3$ , 400 MHz):  $\delta$  9.34(d, 1H, NH,  $J_{\text{H-P}}=10.0\text{Hz}$ ), 7.32-7.27(m, 4H), 7.22-7.16(m, 6H), 6.87-6.85(m, 1H), 4.30(dd, 2H,  $J=4.4, 2.5\text{Hz}$ ), 3.68(t, 2H,  $J=5.5\text{Hz}$ ), 2.17-2.11(m, 2H);  $^{13}\text{C}$  NMR ( $\text{CDCl}_3$ , 100 MHz):  $\delta$  166.6(d, C5,  $J_{\text{C-P}}=3.3\text{Hz}$ ), 150.6(C4 or C4'), 150.5(C4 or C4'), 135.9 (C8), 132.5(d, C6,  $J_{\text{C-P}}=10.4\text{Hz}$ ), 130.2(C2 & C2'), 126.1(C1 & C1'), 120.9(C3 or C3'), 120.9(C3 or C3'), 64.8(C7), 63.6, 25.9;  $^{31}\text{P}$  NMR ( $\text{CDCl}_3$ , 162 MHz):  $\delta$  -9.1(d,  $J_{\text{P-H}}=9.9\text{Hz}$ ).

HRMS(EI)  $m/z$  Calcd. for  $\text{C}_{18}\text{H}_{18}\text{NO}_5\text{P}$   $[\text{M}]^+$  359.0923, found 359.0911.

### Diphenyloctanoylphosphoramidate 2m

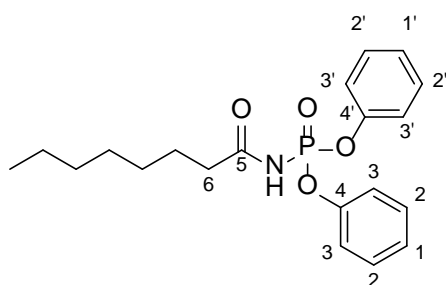

$^1\text{H}$  NMR ( $\text{CDCl}_3$ , 400 MHz):  $\delta$  9.06(d, 1H, NH,  $J_{\text{H-P}}=11.0\text{Hz}$ ), 7.32-7.26(m, 4H), 7.21-7.16(m, 6H), 2.19(t, 2H,  $J=7.3\text{Hz}$ ), 1.50(m, 2H), 1.24(m, 8H), 0.88-0.84(m, 3H);  $^{13}\text{C}$  NMR ( $\text{CDCl}_3$ , 100 MHz):  $\delta$  174.6(d, C5,  $J_{\text{C-P}}=4.8\text{Hz}$ ), 150.1(C4 or C4'), 150.0(C4 or C4'), 129.8(C2 & C2'), 125.7(C1 & C1'), 120.6(C3 or C3'), 120.5(C3 or C3'), 37.2(d, C6,  $J_{\text{C-P}}=9.5\text{Hz}$ ), 31.7, 29.0, 28.9, 24.8, 22.7, 14.1;  $^{31}\text{P}$  NMR ( $\text{CDCl}_3$ , 162 MHz):  $\delta$  -10.4(d,  $J_{\text{P-H}}=11.1\text{Hz}$ ).

HRMS(EI)  $m/z$  Calcd. for  $\text{C}_{20}\text{H}_{26}\text{NO}_4\text{P}$   $[\text{M}]^+$  375.1599, found 375.1593.

Anal. Calcd. for  $\text{C}_{20}\text{H}_{26}\text{NO}_4\text{P}$ : C, 63.99; H, 6.98; N, 3.73. Found: C, 64.14; H, 7.07; N, 3.63.

### Diphenyl (3-phenylpropanoyl)phosphoramidate 2n

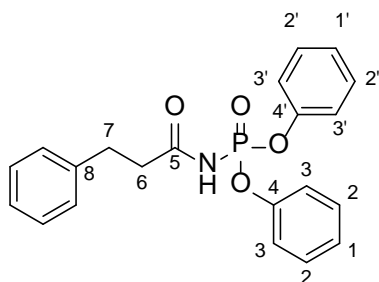

$^1\text{H}$  NMR ( $\text{CDCl}_3$ , 400MHz):  $\delta$ 9.15(d, 1H, NH,  $J_{\text{H-P}}=11.4\text{Hz}$ ), 7.25-7.11(m, 15H), 2.84(t, 2H,  $J=7.7\text{Hz}$ ), 2.50(t, 2H,  $J=7.7\text{Hz}$ );  $^{13}\text{C}$  NMR ( $\text{CDCl}_3$ , 100MHz):  $\delta$ 173.58(d, C5,  $J_{\text{C-P}}=4.8\text{Hz}$ ), 150.0(C4 or C4'), 149.9(C4 or C4'), 140.3(C8), 129.8(C2 & C2'), 128.5, 128.5, 126.3, 125.7(C1 & C1'), 120.6(C3 or C3'), 120.5(C3 or C3'), 38.6(d, C6,  $J_{\text{C-P}}=9.9\text{Hz}$ ), 30.5(C7);  $^{31}\text{P}$  NMR ( $\text{CDCl}_3$ , 162MHz):  $\delta$ -9.8(d,  $J_{\text{P-H}}=11.6\text{Hz}$ ).

HRMS(EI)  $m/z$  Calcd. for  $\text{C}_{21}\text{H}_{20}\text{NO}_4\text{P}$   $[\text{M}]^+$  381.1130, found 381.1118.

### Diphenyl (1,5-dimethyl-3-oxo-2-phenyl-2,3-dihydro-1H-pyrazole-4-carbonyl)-phosphoramidate 2o

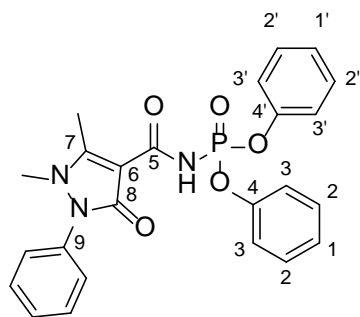

$^1\text{H}$  NMR ( $\text{CDCl}_3$ , 400MHz):  $\delta$ 10.30(d, 1H, NH,  $J_{\text{H-P}}=14.0\text{Hz}$ ), 7.52(t, 2H,  $J=7.5\text{Hz}$ ), 7.47(t, 1H,  $J=7.4\text{Hz}$ ), 7.30-7.27(m, 10H), 7.16-7.13(m, 2H), 3.33(s, 3H), 2.70(s, 3H);  $^{13}\text{C}$  NMR ( $\text{CDCl}_3$ , 100MHz):  $\delta$ 163.9(C5), 163.1(C8), 154.9(C7), 150.6(C4 or C4'), 150.5(C4 or C4'), 132.7(C9), 129.9, 129.7(C2 & C2'), 129.5, 127.0, 125.3(C1 & C1'), 120.8(C3 or C3'), 120.7(C3 or C3'), 98.3(d,

C6,  $J_{C-P}=12.5\text{Hz}$ ), 33.4(N-CH<sub>3</sub>), 12.1; <sup>31</sup>P NMR (CDCl<sub>3</sub>,162MHz): δ-10.3(d,  $J_{P-H}=13.9\text{Hz}$ ).

HRMS(EI) m/z Calcd. for C<sub>24</sub>H<sub>22</sub>N<sub>3</sub>O<sub>5</sub>P [M]<sup>+</sup> 463.1297 , found 463.1285.

### Dimethyl (4-methylbenzoyl)phosphoramidate 2p

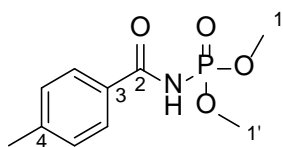

<sup>1</sup>H NMR (CDCl<sub>3</sub>,400MHz): δ9.01(d, 1H, NH,  $J_{H-P}=9.1\text{Hz}$ ), 7.96(d, 2H,  $J=6.7\text{Hz}$ ), 7.28(d, 2H,  $J=6.8\text{Hz}$ ), 3.91(s, 3H), 3.88(s, 3H), 2.41(s, 3H); <sup>13</sup>C NMR (CDCl<sub>3</sub>,100MHz): δ167.9(d, C2,  $J_{C-P}=2.0\text{Hz}$ ), 143.8(C4), 129.6(d, C3,  $J_{C-P}=10.5\text{Hz}$ ), 129.4, 128.4, 54.6(C1 or C1'), 54.5(C1 or C1'), 21.7; <sup>31</sup>P NMR (CDCl<sub>3</sub>,162MHz): δ1.8(d,  $J_{P-H}=9.6\text{Hz}$ ).

HRMS(EI) m/z Calcd. for C<sub>10</sub>H<sub>14</sub>NO<sub>4</sub>P [M]<sup>+</sup> 243.0660 , found 243.0649.

Anal. Calcd. for C<sub>10</sub>H<sub>14</sub>NO<sub>4</sub>P: C, 49.39; H, 5.80; N, 5.76. Found: C, 49.09; H, 5.78; N, 5.61.

### Diethyl (4-methylbenzoyl)phosphoramidate 2q

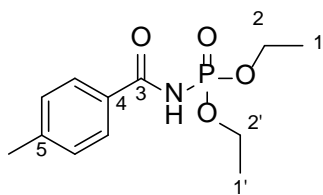

<sup>1</sup>H NMR (CDCl<sub>3</sub>,400MHz): δ8.83(d, 1H, NH,  $J_{H-P}=9.0\text{Hz}$ ), 7.93(d, 2H,  $J=8.2\text{Hz}$ ), 7.27(d, 2H,  $J=7.9\text{Hz}$ ), 4.34-4.20(m, 4H), 2.41(s, 3H), 1.37(t, 6H,  $J=7.0\text{Hz}$ ); <sup>13</sup>C NMR (CDCl<sub>3</sub>,100MHz): δ167.4(C3), 143.3(C5), 129.6(d, C4,  $J_{C-P}=10.4\text{Hz}$ ), 129.1, 128.0, 64.0(C2 or C2'), 63.9(C2 or C2'), 21.3, 15.9(C1 or C1'), 15.8(C1 or C1'); <sup>31</sup>P NMR (CDCl<sub>3</sub>,162MHz): δ-1.5(q,  $J_{P-H}=8.0\text{Hz}$ ).

HRMS(EI)  $m/z$  Calcd. for  $C_{12}H_{18}NO_4P$   $[M]^+$  271.0973, found 271.0968.

**Bis(2,2,2-trichloroethyl) (4-methylbenzoyl)phosphoramidate 2r**

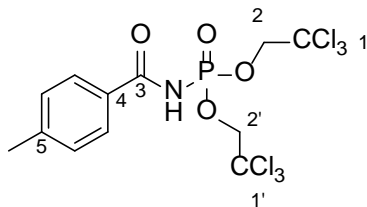

$^1H$  NMR ( $CDCl_3$ , 400 MHz):  $\delta$  9.46(d, 1H, NH,  $J_{H-P}=10.1$  Hz), 7.94(d, 2H,  $J=8.1$  Hz), 7.27(d, 2H,  $J=7.7$  Hz), 4.84(s, 2H), 4.82(s, 2H), 2.42(s, 3H);  $^{13}C$  NMR ( $CDCl_3$ , 75 MHz):  $\delta$  168.2(C3), 144.5(C5), 129.7, 128.8(d, C4,  $J_{C-P}=10.9$  Hz), 128.5, 94.8(C1 or C1'), 94.7(C1 or C1'), 77.9(C2 or C2'), 77.9(C2 or C2'), 21.8;  $^{31}P$  NMR ( $CDCl_3$ , 162 MHz):  $\delta$  -3.7(q,  $J_{P-H}=7.9$  Hz).

HRMS(EI)  $m/z$  Calcd. for  $C_{12}H_{12}Cl_6NO_4P$   $[M]^+$  474.8635, found 474.8626.

Anal. Calcd. for  $C_{12}H_{12}Cl_6NO_4P$ : C, 30.16; H, 2.53; N, 2.93. Found: C, 30.33; H, 2.59; N, 3.04.

**Bis(4-nitrophenyl) (4-methylbenzoyl)phosphoramidate 2s**

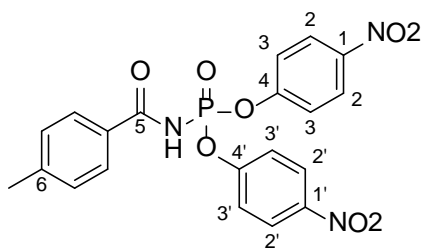

$^1H$  NMR ( $CDCl_3$ , 400 MHz):  $\delta$  8.97(s, 1H, NH), 8.18(d, 4H,  $J=8.4$  Hz), 7.81(d, 2H,  $J=7.9$  Hz), 7.42(d, 4H,  $J=8.7$  Hz), 7.25(d, 2H,  $J=7.5$  Hz), 2.43(s, 3H);  $^{13}C$  NMR ( $CDCl_3$ , 100 MHz):  $\delta$  161.7 (C5), 154.2(C4 or C4'), 154.2(C4 or C4'), 145.6(C6), 145.3(C1 & C1'), 129.8, 128.3, 126.3, 125.9(C2 & C2'), 121.4(C3 or C3'), 121.3(C3 or C3'), 115.8, 21.7;  $^{31}P$  NMR ( $CDCl_3$ , 162 MHz):  $\delta$  -10.4(s).



### Bis(2,2,2-trichloroethyl) benzoylphosphoramidate **2t**

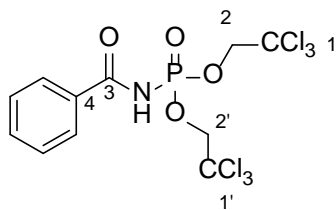

$^1\text{H}$  NMR ( $\text{CDCl}_3$ , 400 MHz):  $\delta$  9.49(d, 1H, NH,  $J_{\text{H-P}}=8.6\text{Hz}$ ), 8.05(d, 2H,  $J=7.5\text{Hz}$ ), 7.60(t, 1H,  $J=7.4\text{Hz}$ ), 7.48(t, 2H,  $J=7.6\text{Hz}$ ), 4.85(s, 2H), 4.83(s, 2H);  $^{13}\text{C}$  NMR ( $\text{CDCl}_3$ , 100 MHz):  $\delta$  168.2(C3), 133.5, 131.5(d, C4,  $J_{\text{C-P}}=10.9\text{Hz}$ ), 128.8, 128.3, 94.6(C1 or C1'), 94.5(C1 or C1'), 77.8(C2 or C2'), 77.8(C2 or C2');  $^{31}\text{P}$  NMR ( $\text{CDCl}_3$ , 162 MHz):  $\delta$  -3.8(m).

HRMS(EI)  $m/z$  Calcd. for  $\text{C}_{11}\text{H}_{10}\text{Cl}_6\text{NO}_4\text{P}$   $[\text{M}]^+$  460.8479, found 460.8468.

### X-Ray Data of Diphenyl(4-methylbenzoyl)phosphoramidate **2a**

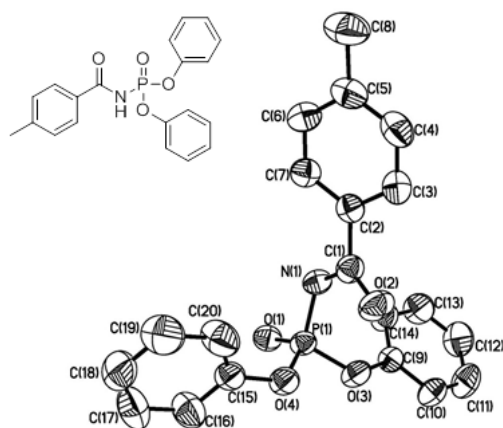

**Fig. S1** X-ray crystal structure of **2a** (CCDC 862823 for **2a** contain the supplementary crystallographic data for this paper. These data can be obtained free of charge from

The Cambridge Crystallographic Data Centre via  
[www.ccdc.cam.ac.uk/data\\_request/cif](http://www.ccdc.cam.ac.uk/data_request/cif)).

### Computing details

Program(s) used to solve structure: *SHELXS97* (Sheldrick, 2008); program(s) used to refine structure: *SHELXL97* (Sheldrick, 2008).

### Crystal data

|                                |                                                         |
|--------------------------------|---------------------------------------------------------|
| $C_{20}H_{18}NO_4P$            | $F(000) = 768$                                          |
| $M_r = 367.32$                 | $D_x = 1.294 \text{ Mg m}^{-3}$                         |
| Monoclinic, $P2_1/n$           | Cu $K\alpha$ radiation, $\lambda = 1.54178 \text{ \AA}$ |
| $a = 10.0023 (7) \text{ \AA}$  | Cell parameters from 216 reflections                    |
| $b = 10.6631 (7) \text{ \AA}$  | $\theta = 3\text{--}45^\circ$                           |
| $c = 17.6975 (12) \text{ \AA}$ | $\mu = 1.50 \text{ mm}^{-1}$                            |
| $\beta = 92.303 (2)^\circ$     | $T = 296 \text{ K}$                                     |
| $V = 1886.0 (2) \text{ \AA}^3$ | Block, Yellow                                           |
| $Z = 4$                        | $0.04 \times 0.04 \times 0.03 \text{ mm}$               |

### Data collection

|                                                  |                                                                     |
|--------------------------------------------------|---------------------------------------------------------------------|
| Radiation source: fine-focus sealed tube         | 3061 reflections with $I > 2\sigma(I)$                              |
| graphite                                         | $R_{\text{int}} = 0.047$                                            |
| Absorption correction: Multi-scan                |                                                                     |
| <i>SADABS</i>                                    | $\theta_{\text{max}} = 65.9^\circ, \theta_{\text{min}} = 4.8^\circ$ |
| $T_{\text{min}} = 0.942, T_{\text{max}} = 0.956$ | $h = -11 \rightarrow 10$                                            |

23806measuredreflections  $k=-12\rightarrow 12$

3232independentreflections  $l=-20\rightarrow 20$

## Refinement

Refinement on  $F^2$  Primary atom site location: Structure-invariant direct methods

Least-square smatrix: Full Secondary atom site location: Difference Fourier map

$R[F^2>2\sigma(F^2)]=0.038$  Hydrogen site location: Inferred from neighbouring sites

$wR(F^2)=0.109$  H-atom parameters constrained

$S=1.04$   $w=1/[\sigma^2(F_o^2)+(0.0697P)^2+0.352P]$

where  $P = (F_o^2 + 2F_c^2)/3$

3232reflections  $(\Delta/\sigma)_{\max}=0.002$

236parameters  $\Delta\rho_{\max}=0.18\text{e}\text{\AA}^{-3}$

0restraints  $\Delta\rho_{\min}=-0.44\text{e}\text{\AA}^{-3}$

## **NMR Spectra**

Bis(2,2,2-trichloroethyl)phosphorazidate3d

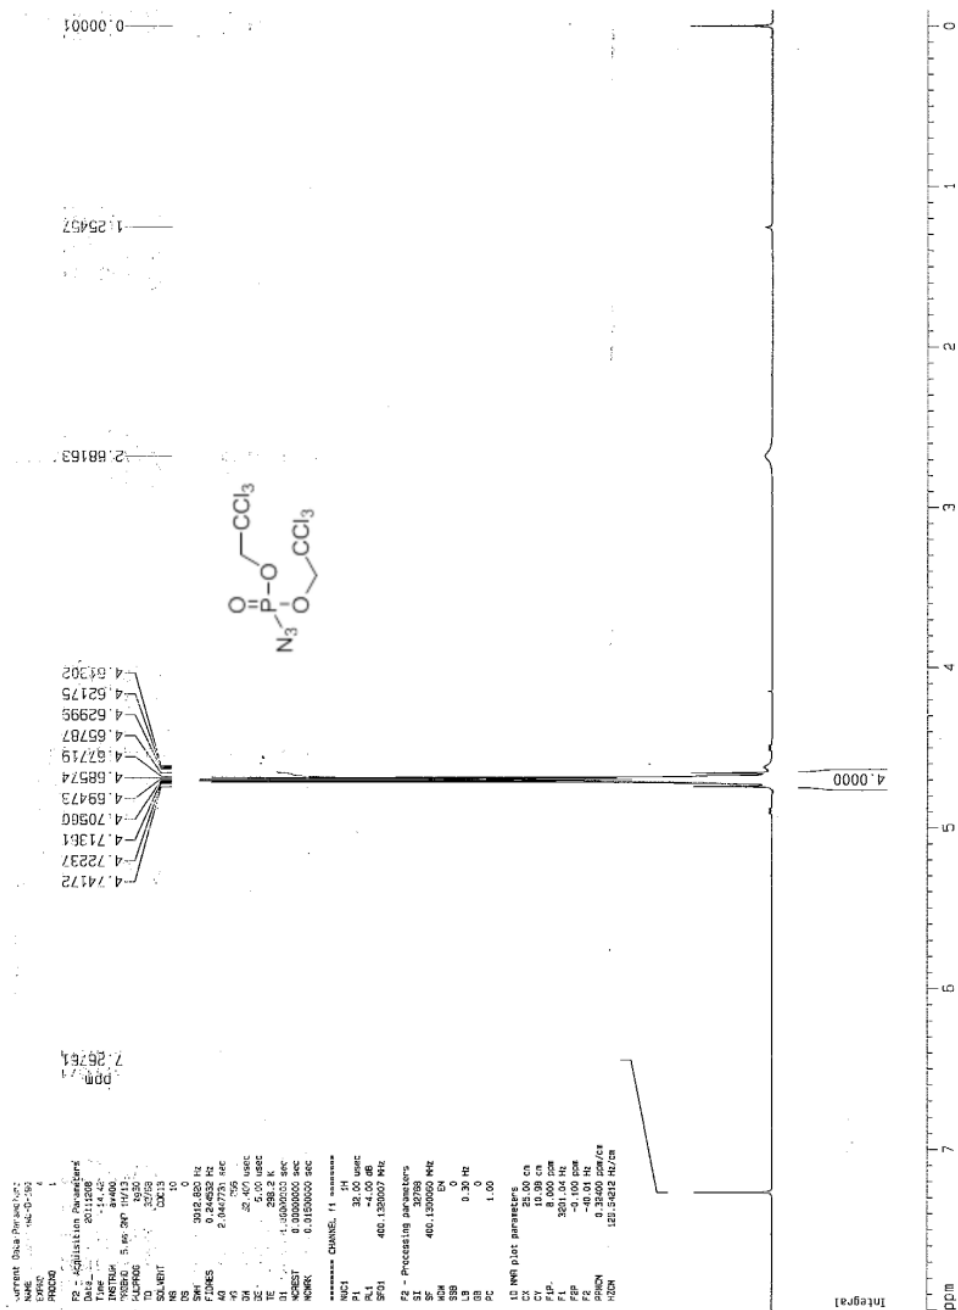

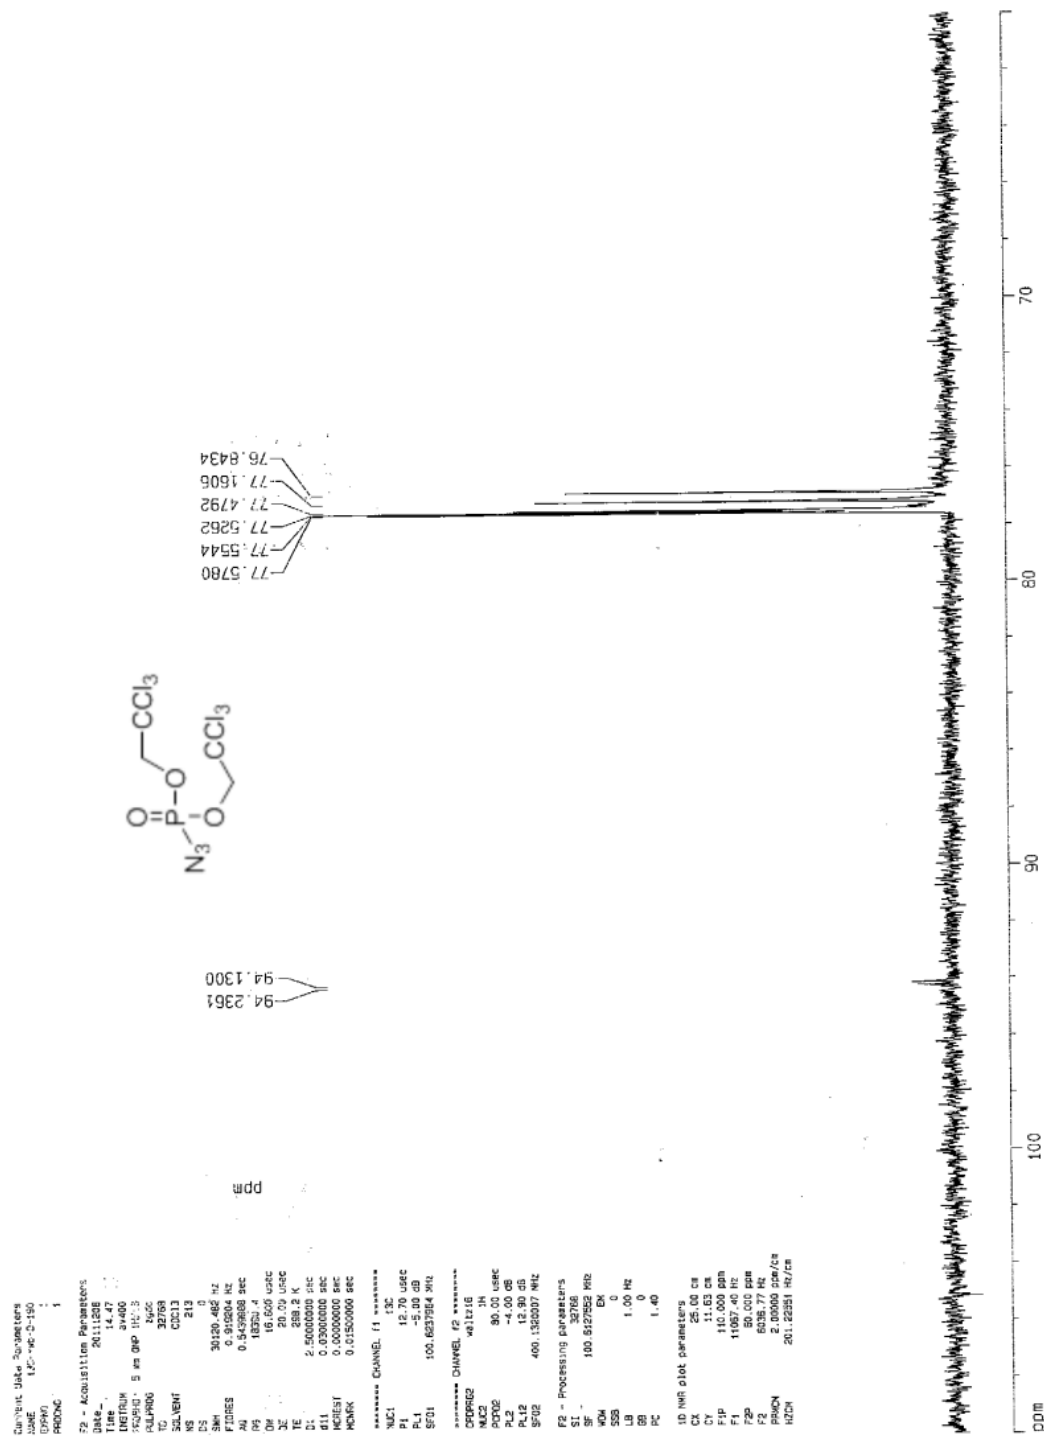



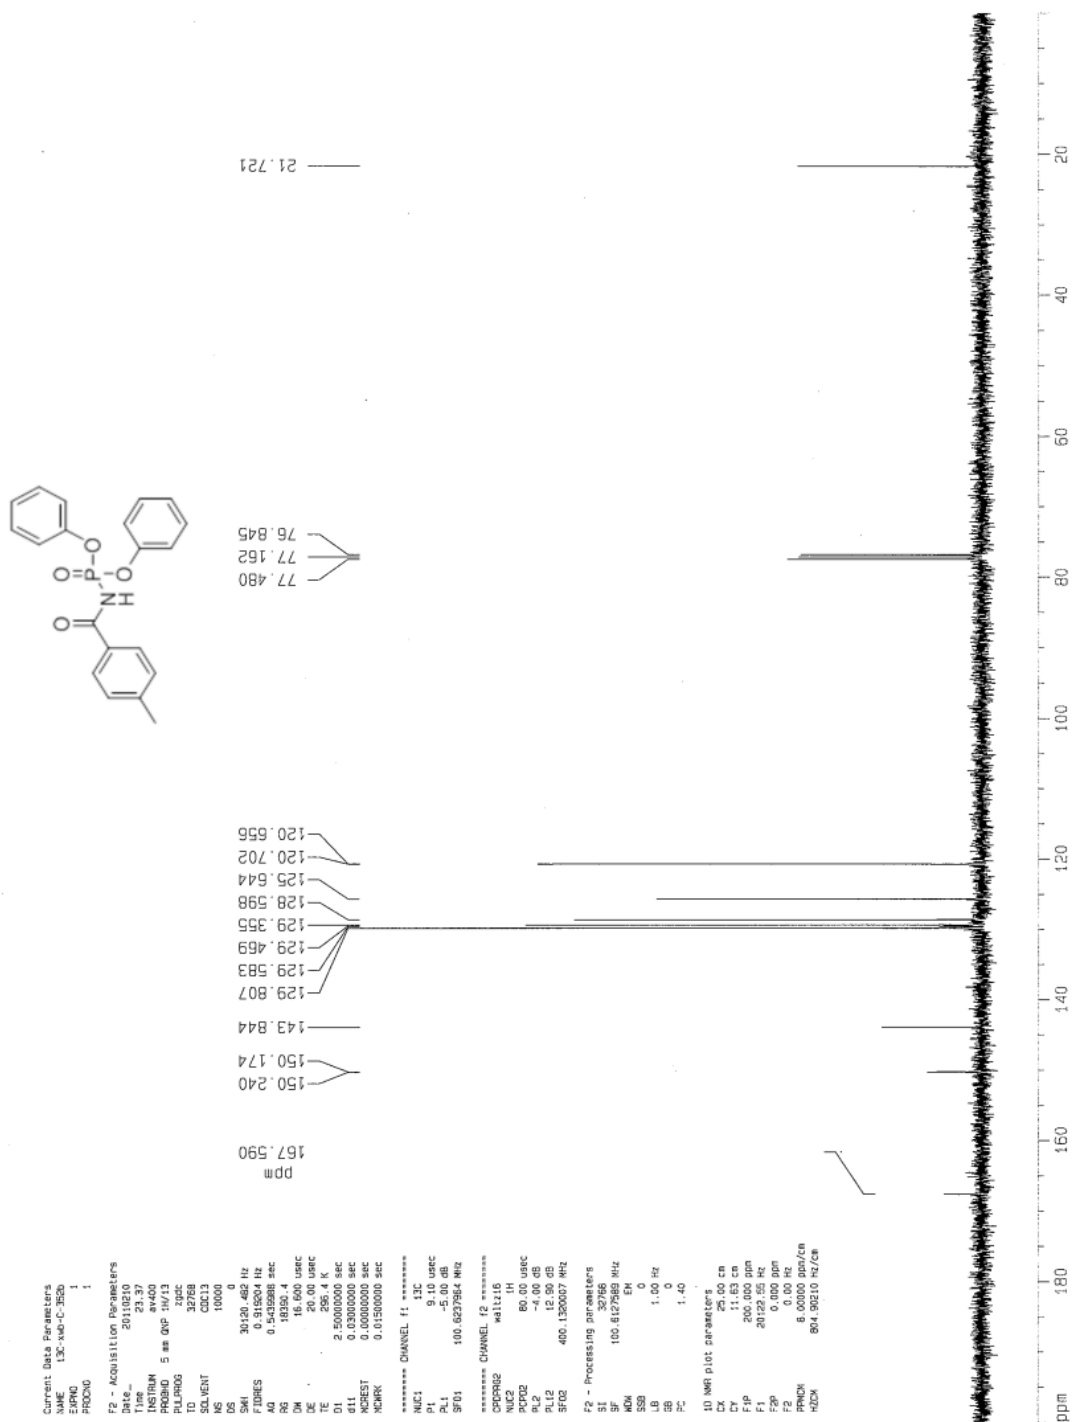



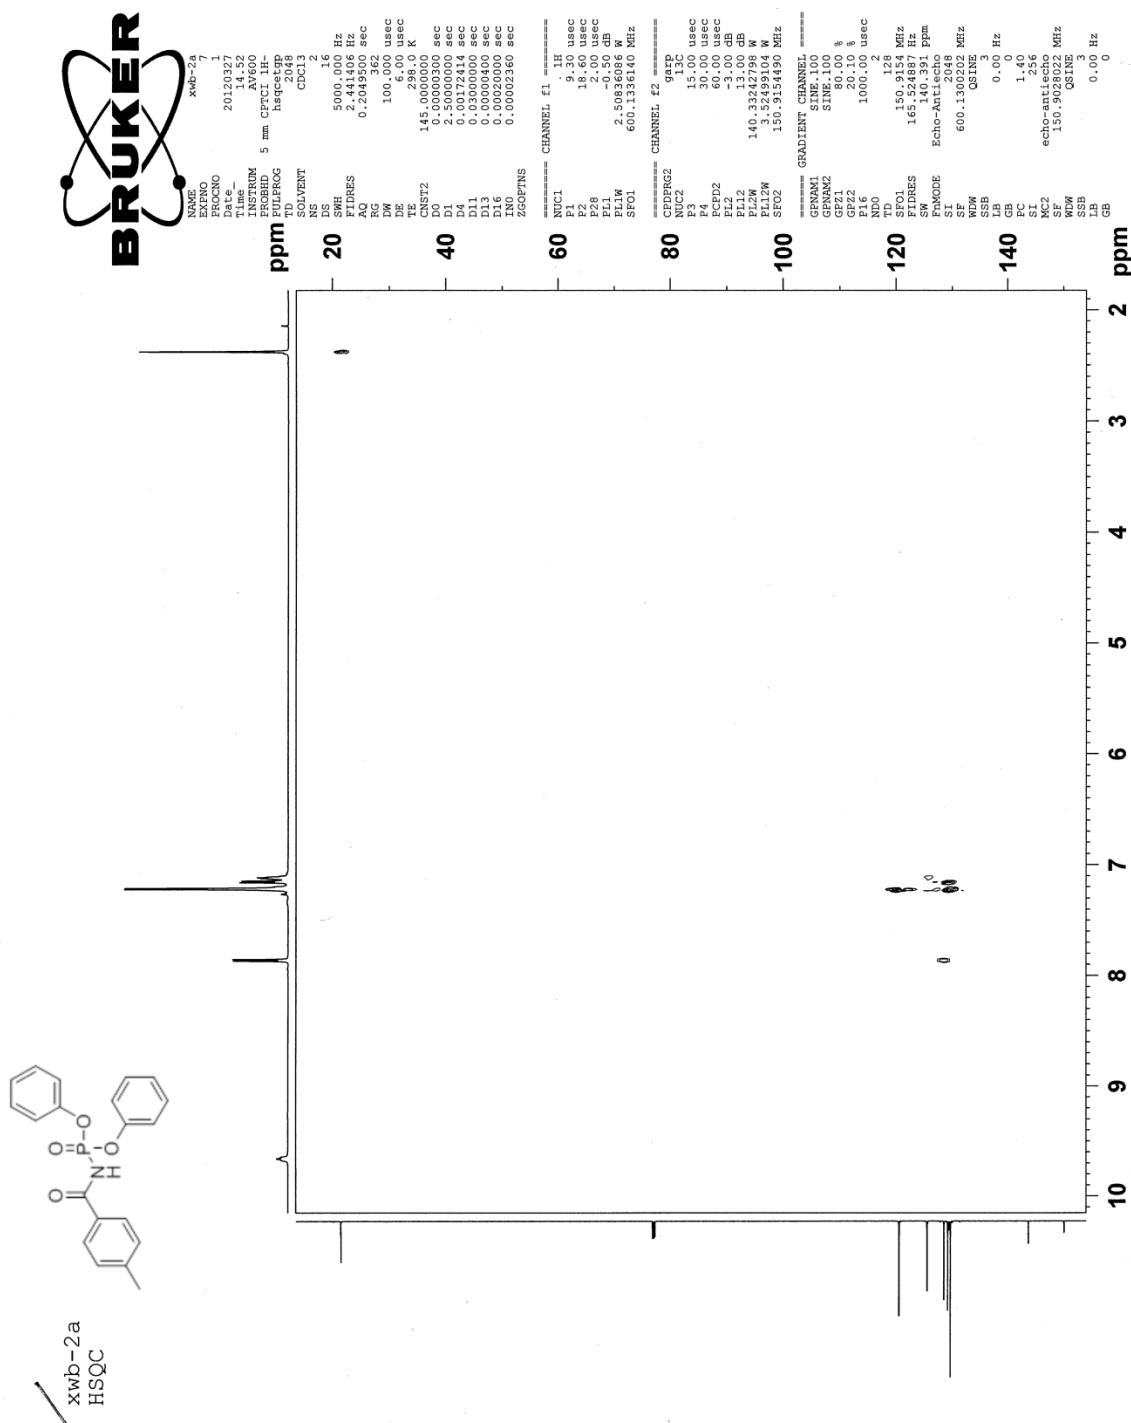



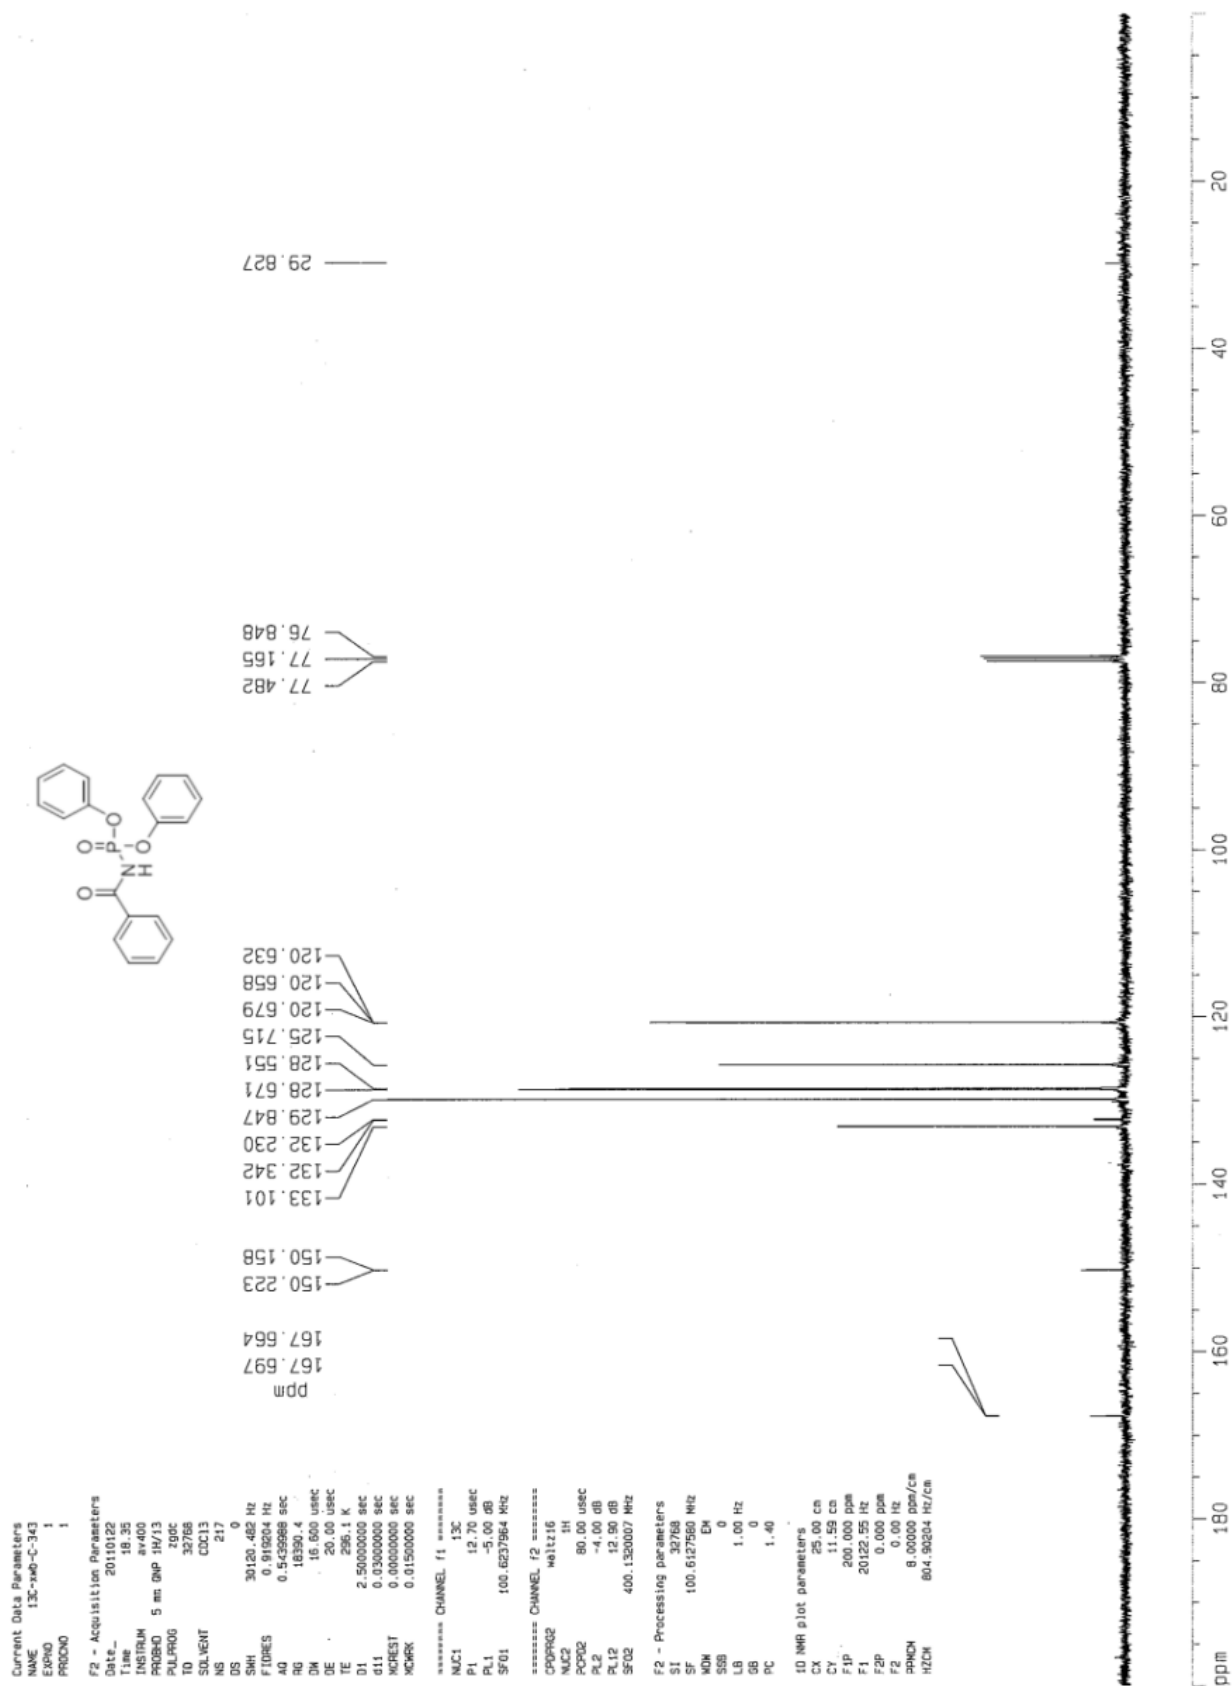

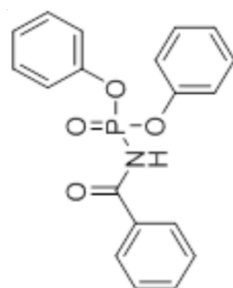xwb-2b  
HSQC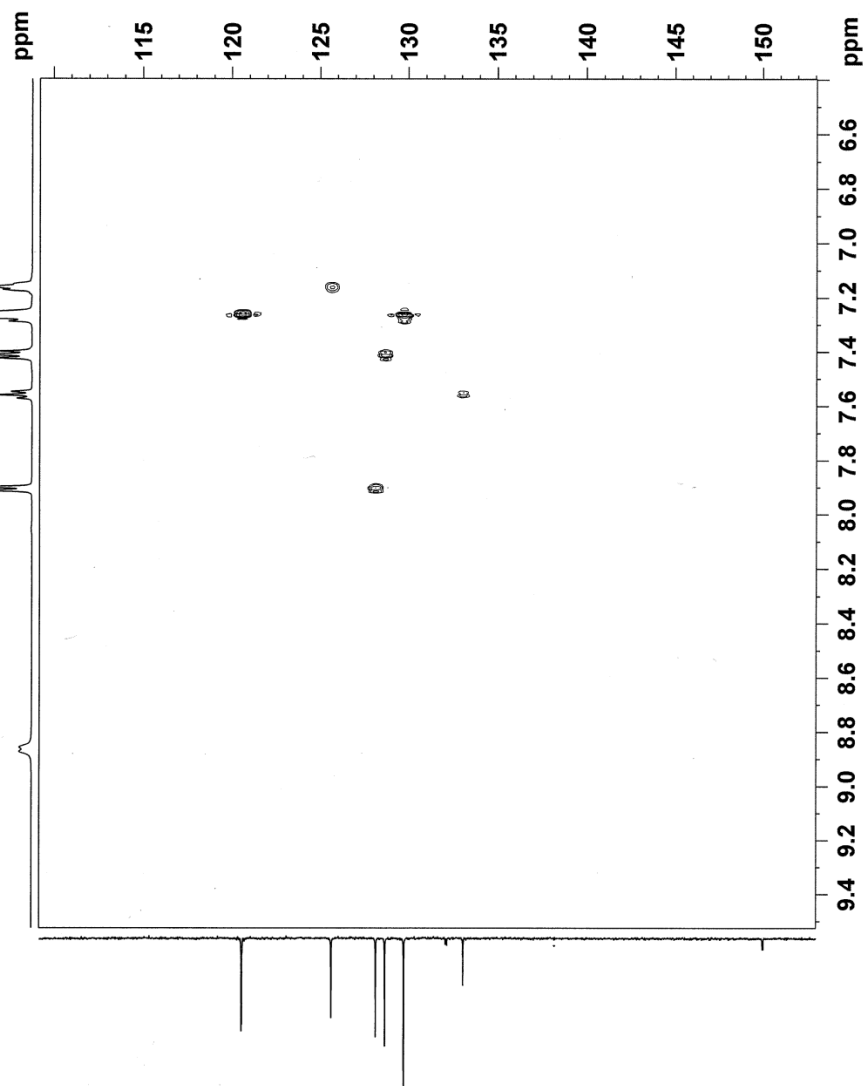[illegible]

Diphenyl (4-methoxybenzoyl)phosphoramidate 2c

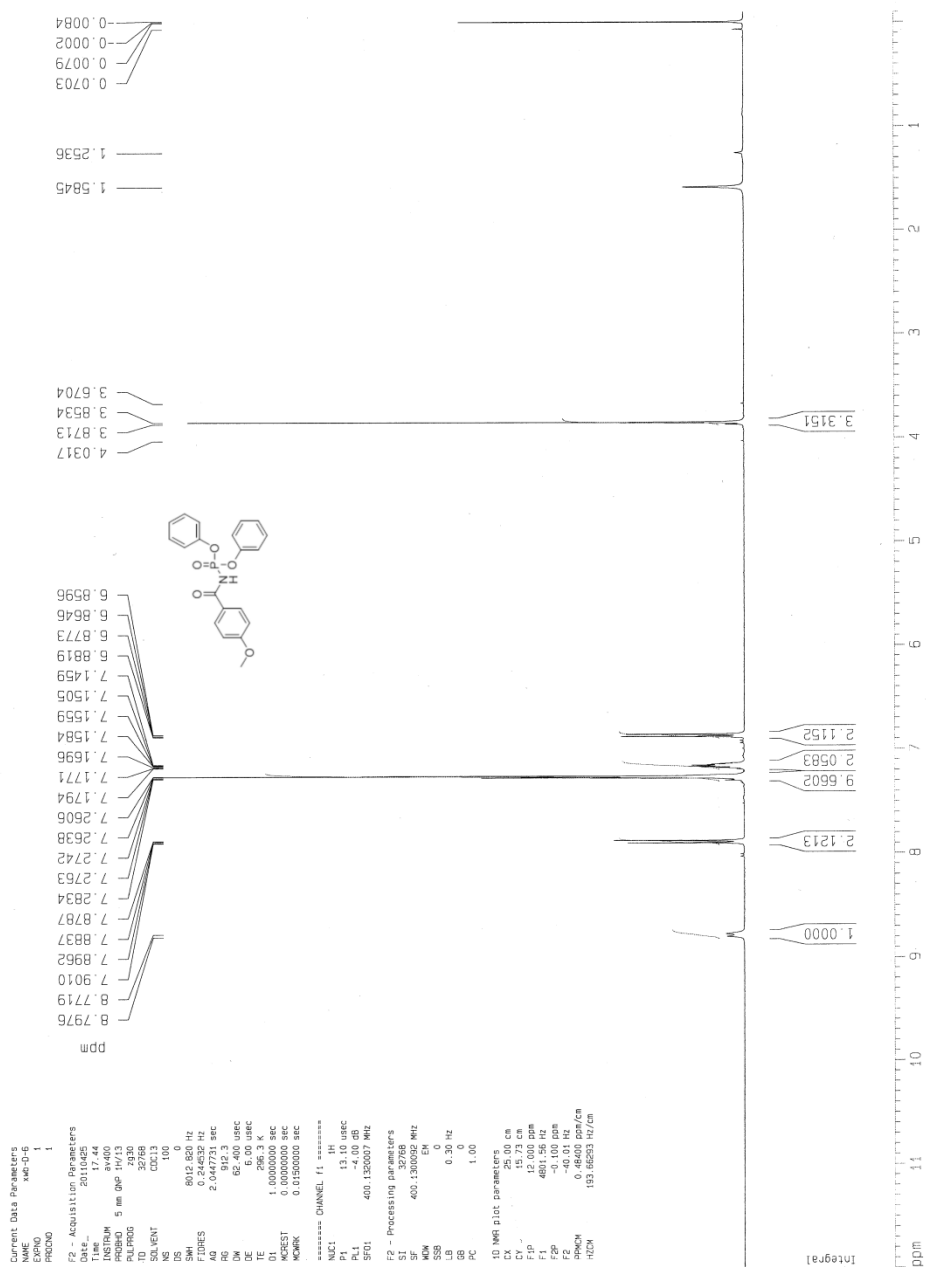

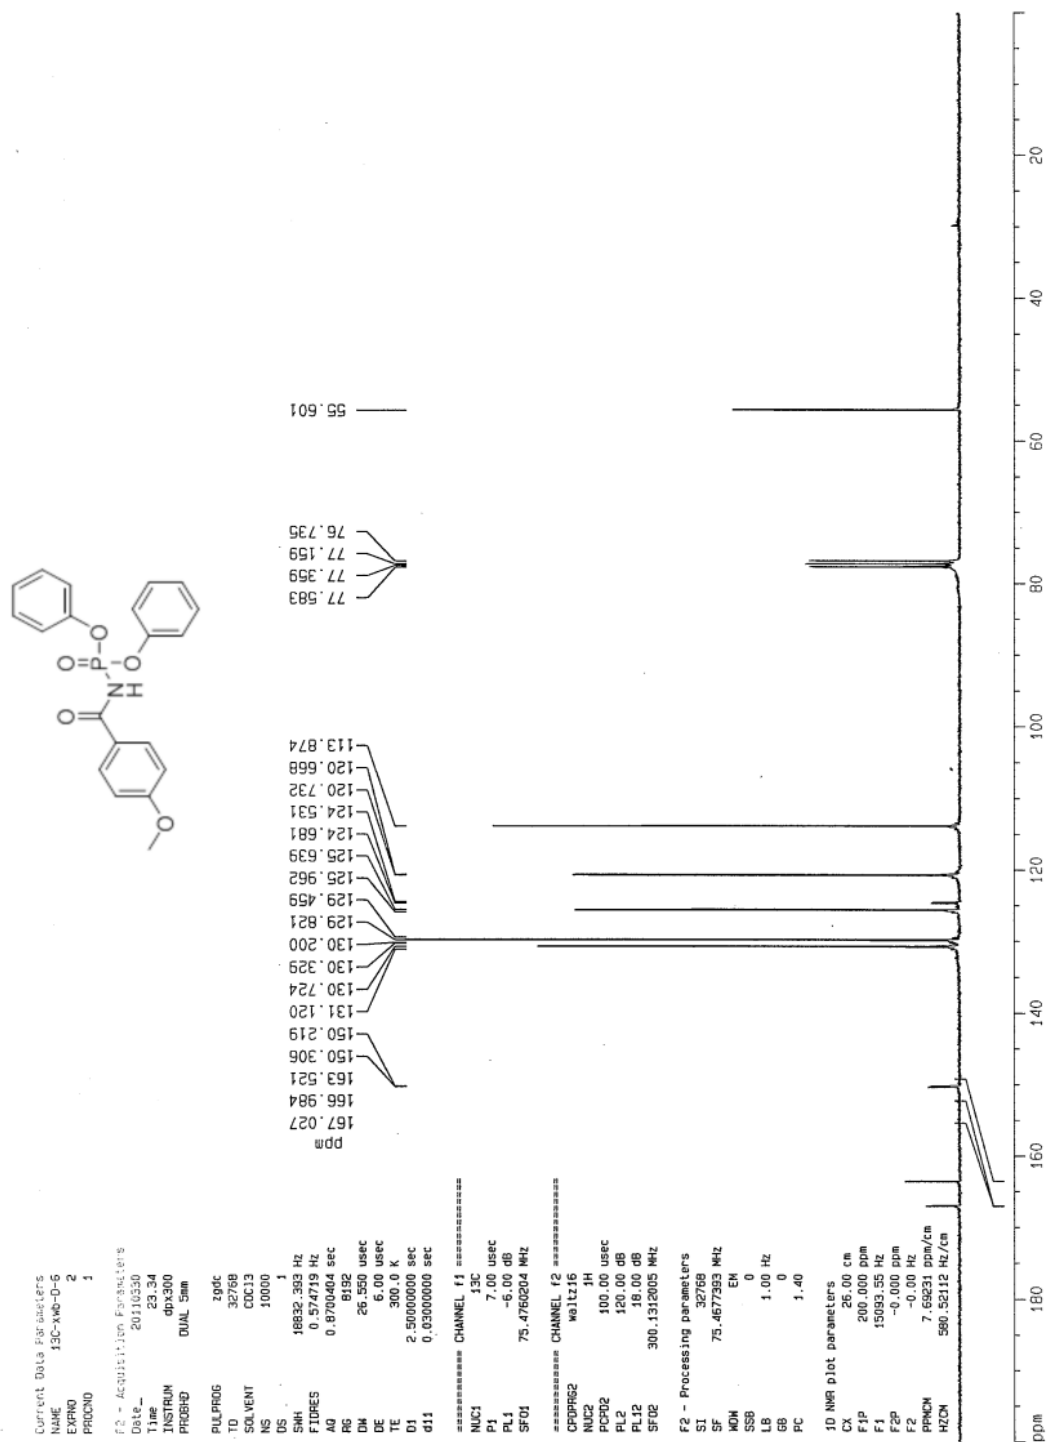

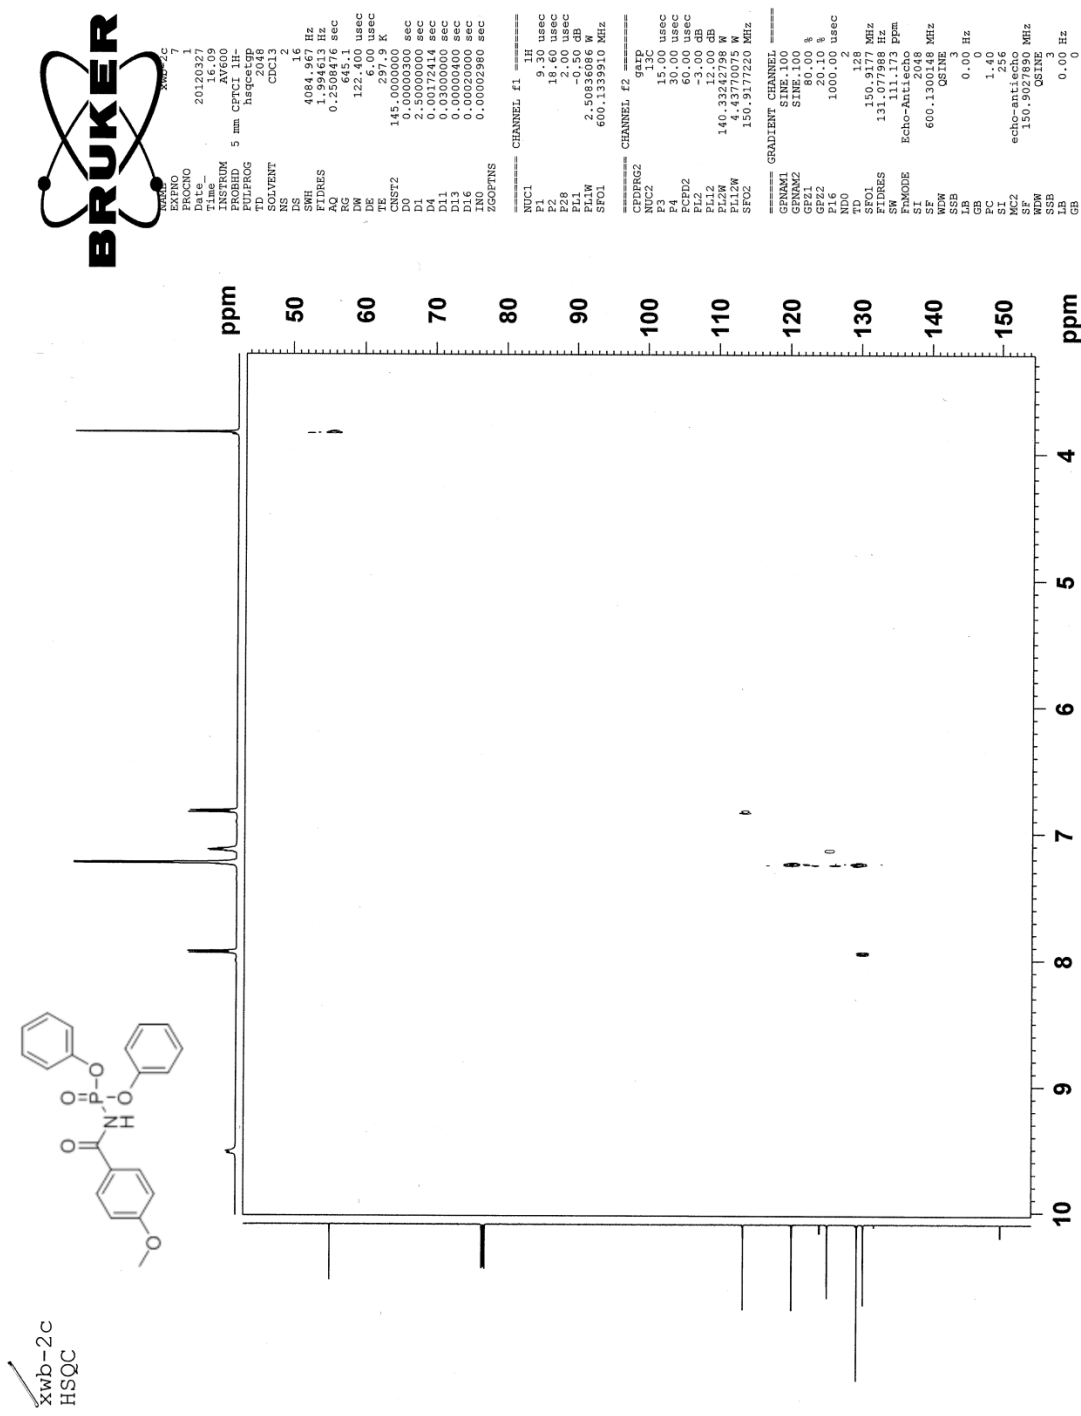

Diphenyl (4-hydroxybenzoyl)phosphoramidate 2d

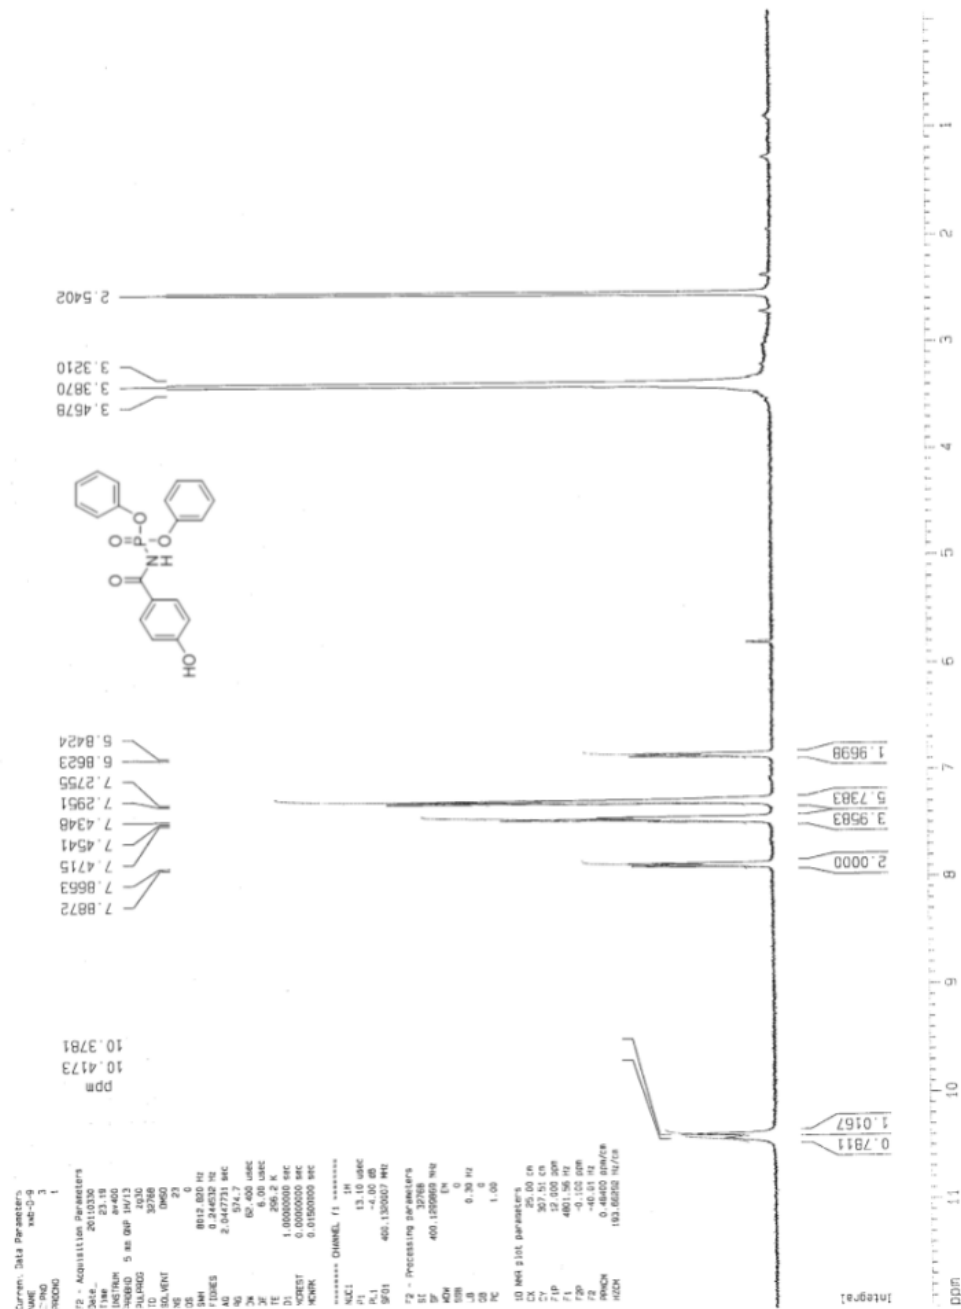



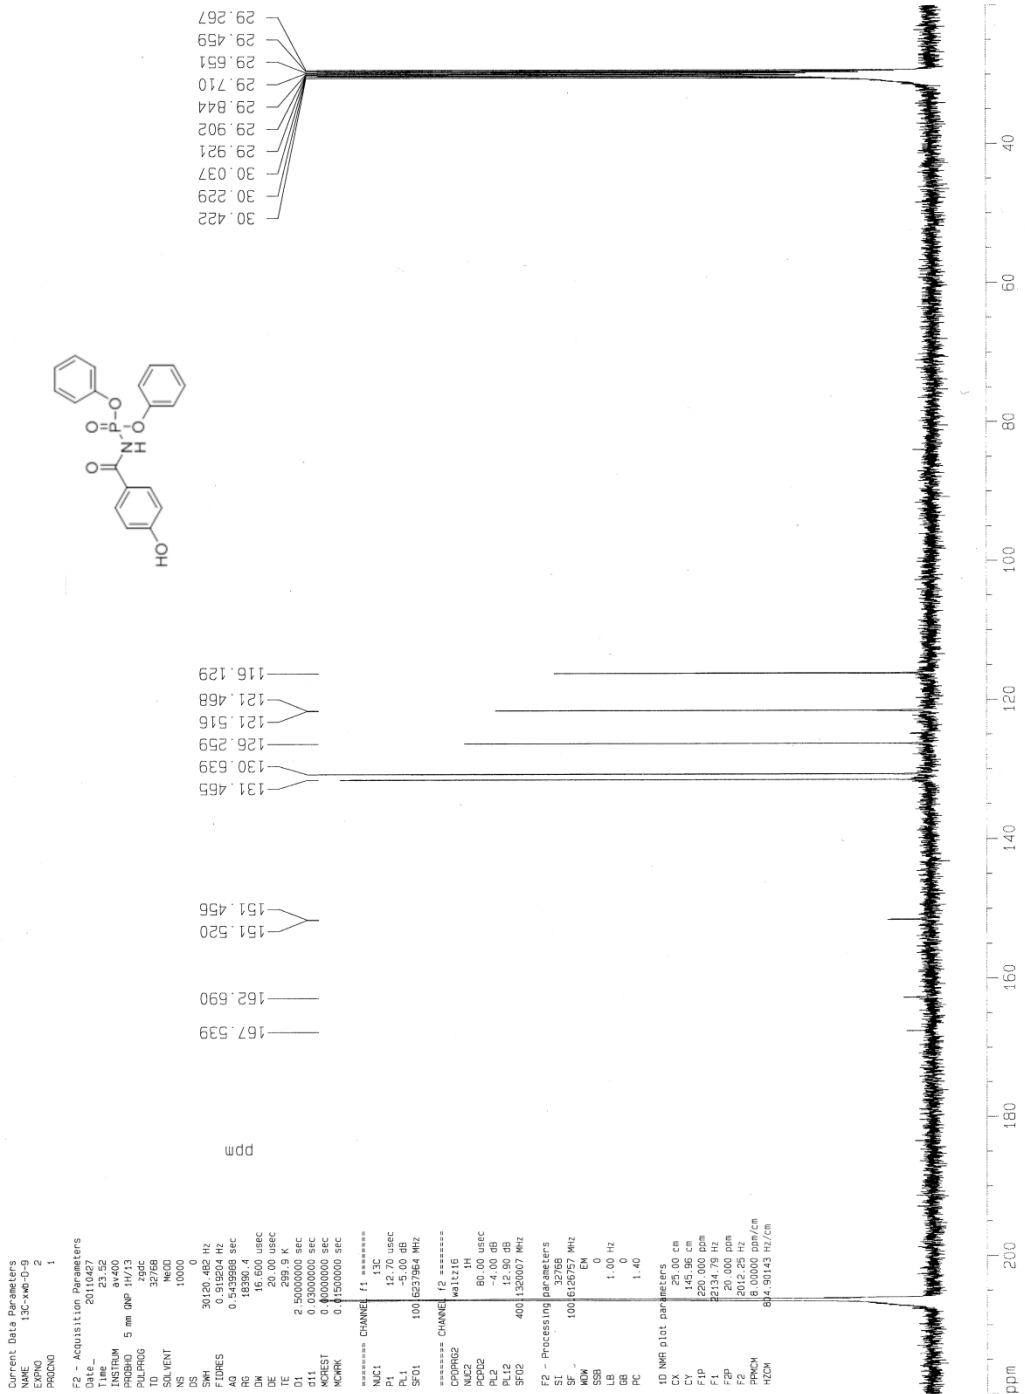

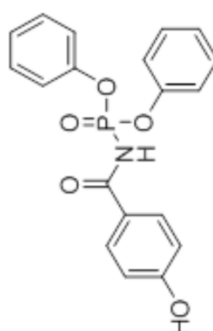xwb-2d  
HSQC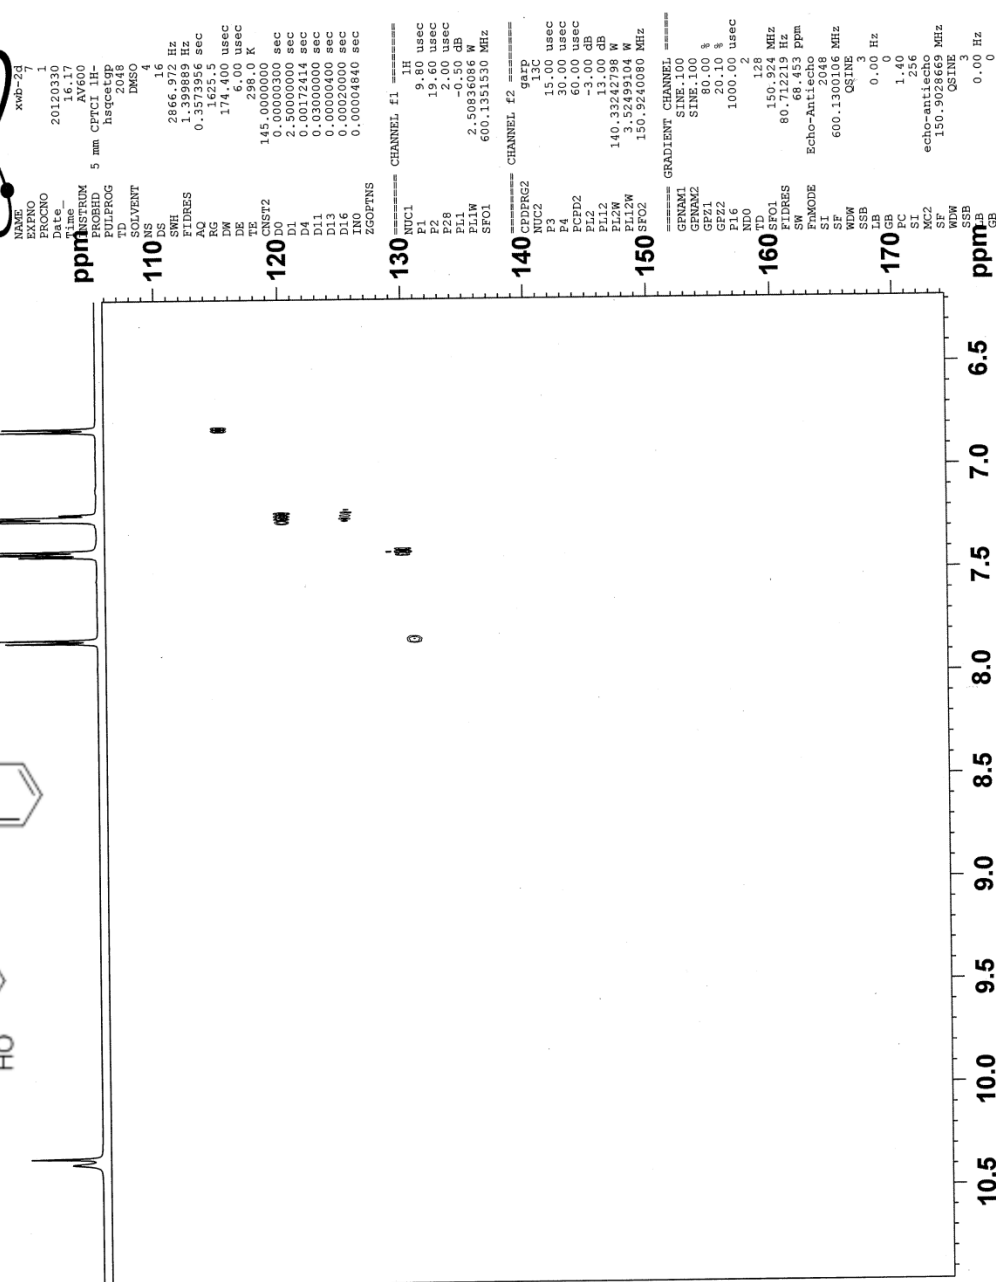

Diphenylbenzo[d][1,3]dioxole-5-carbonylphosphoramidate 2e

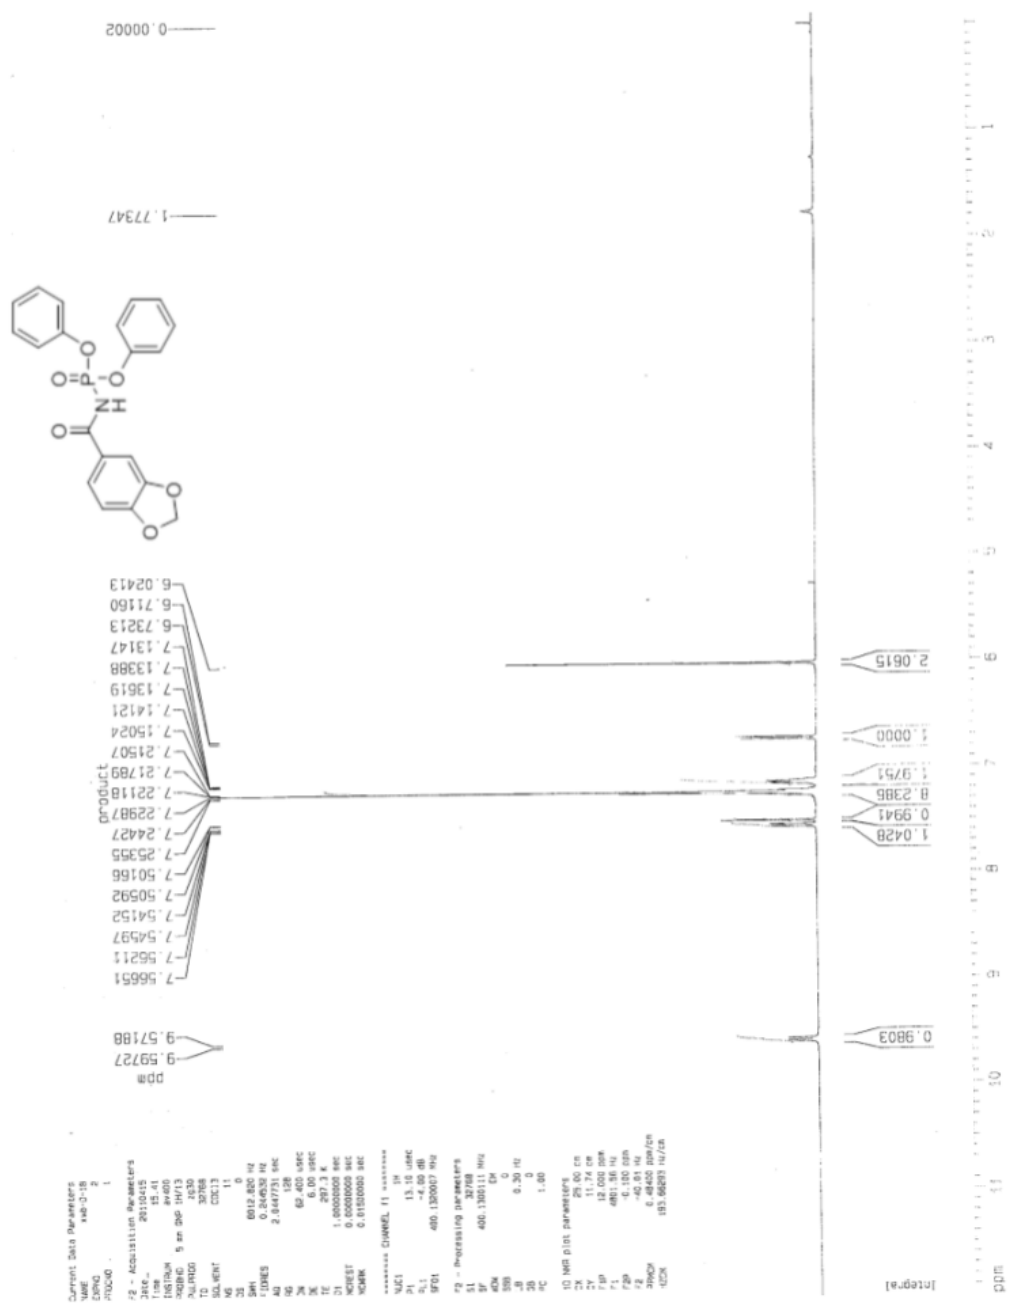

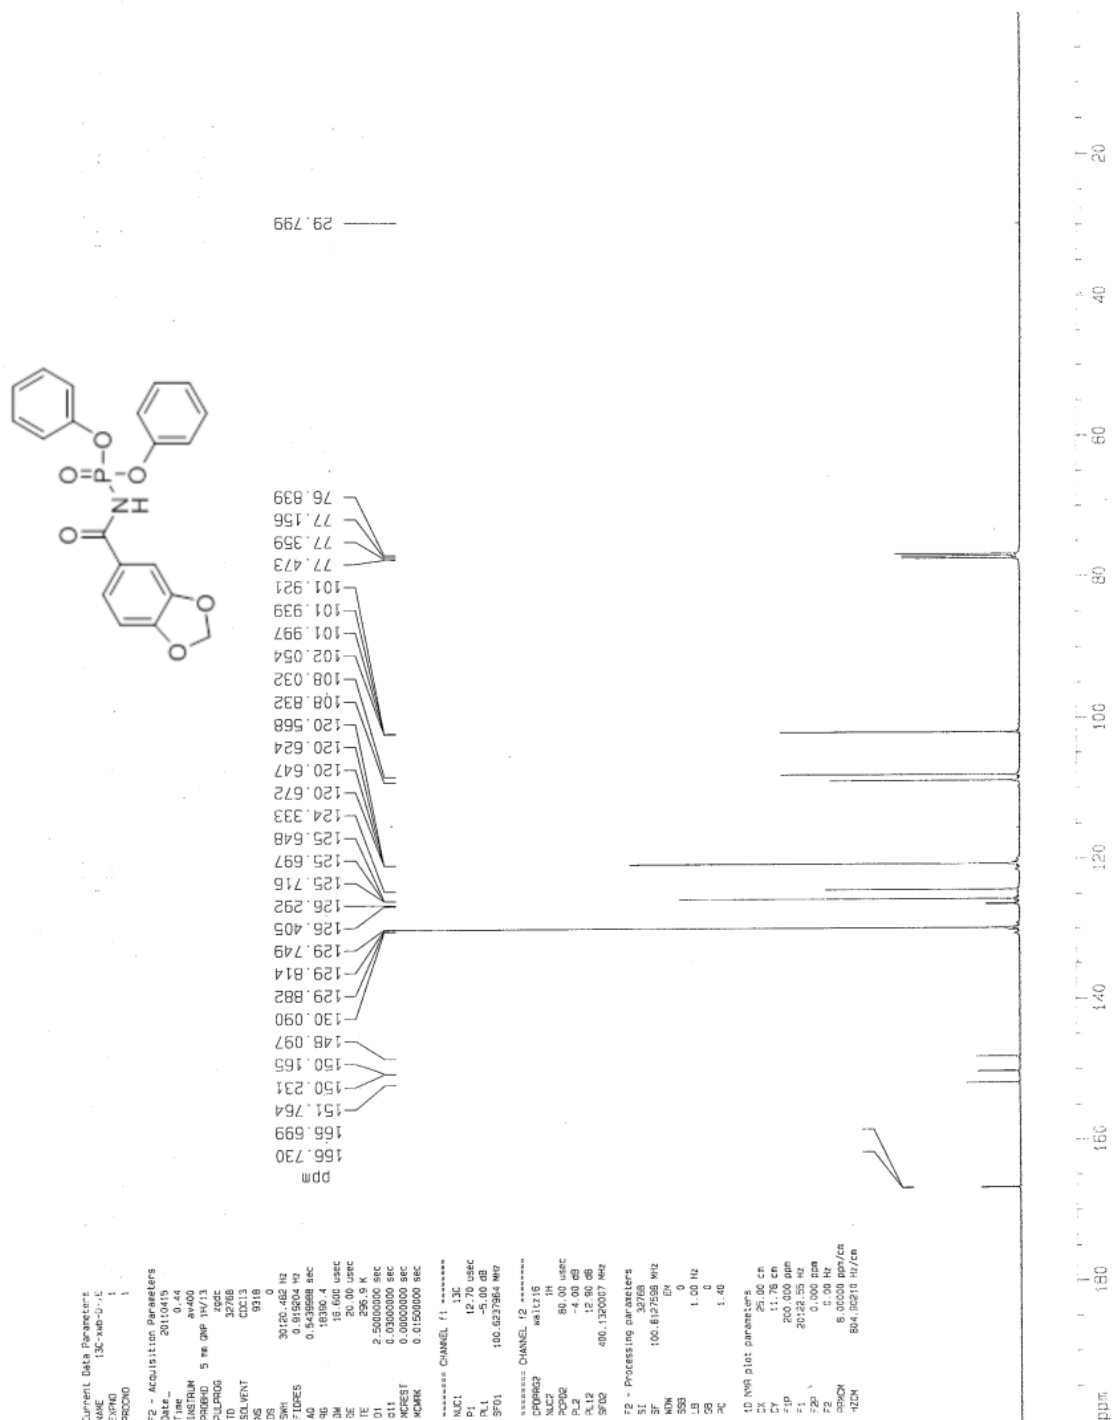

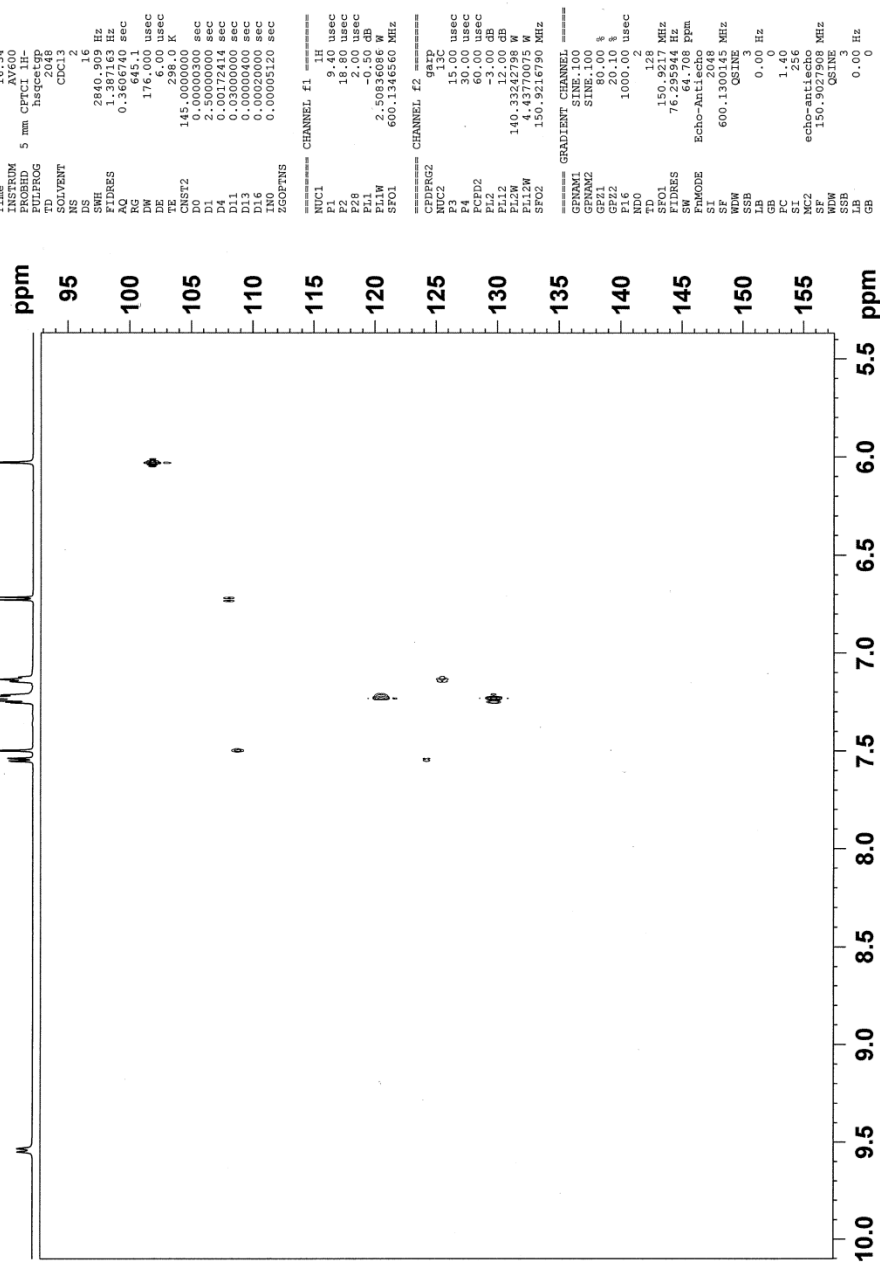

Diphenyl(4-chlorobenzoyl)phosphoramidate 2f

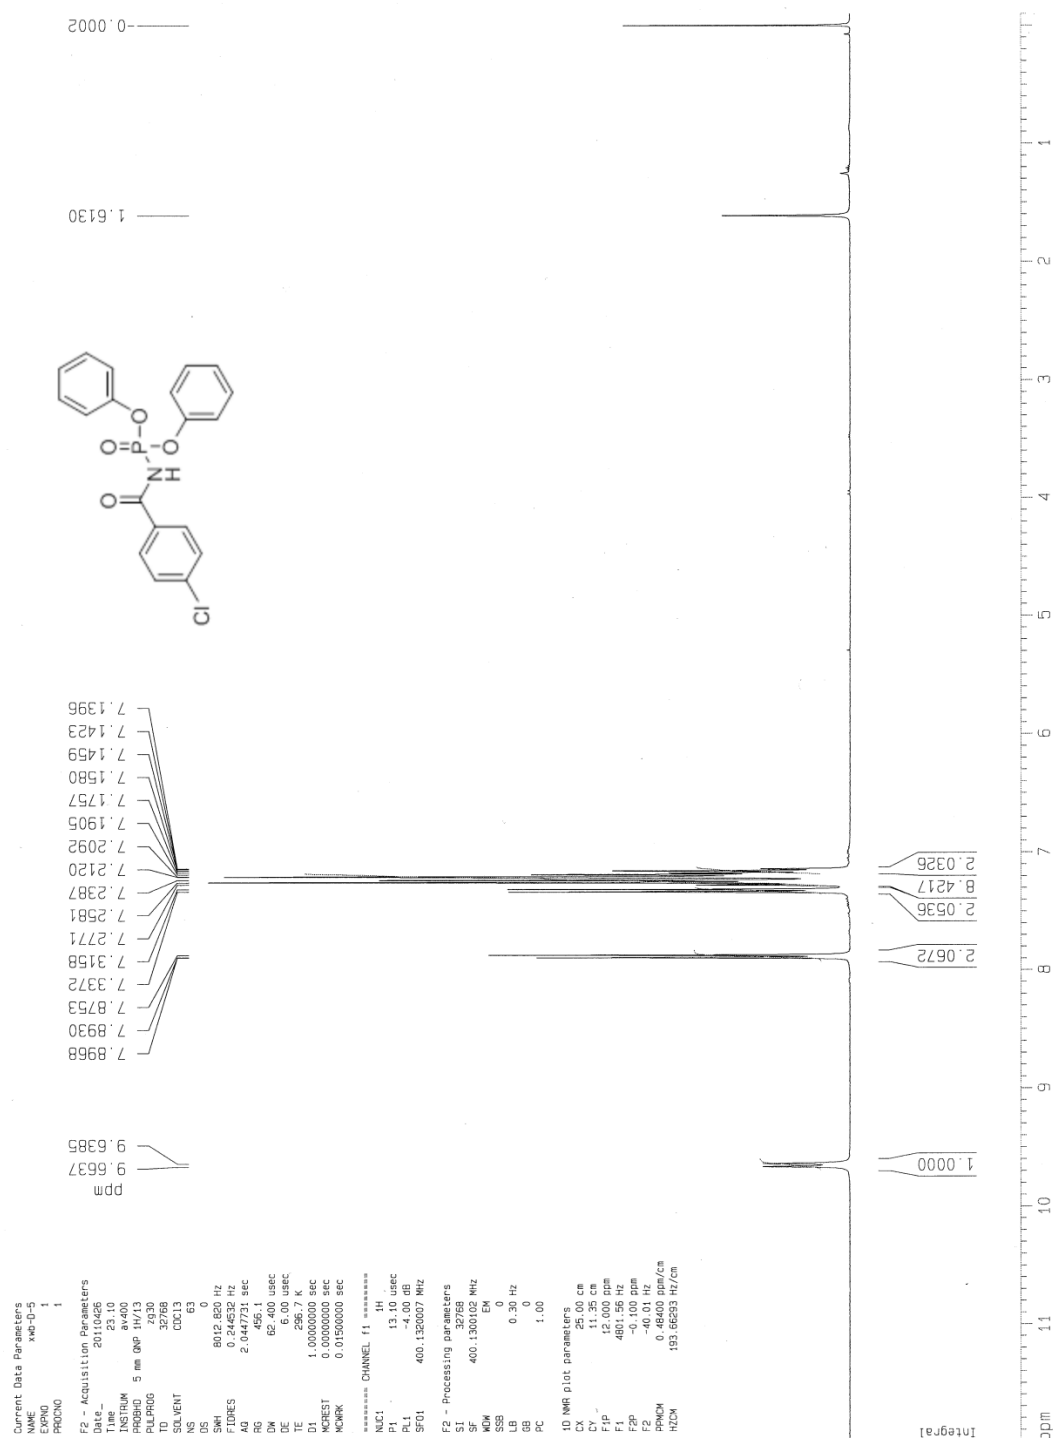

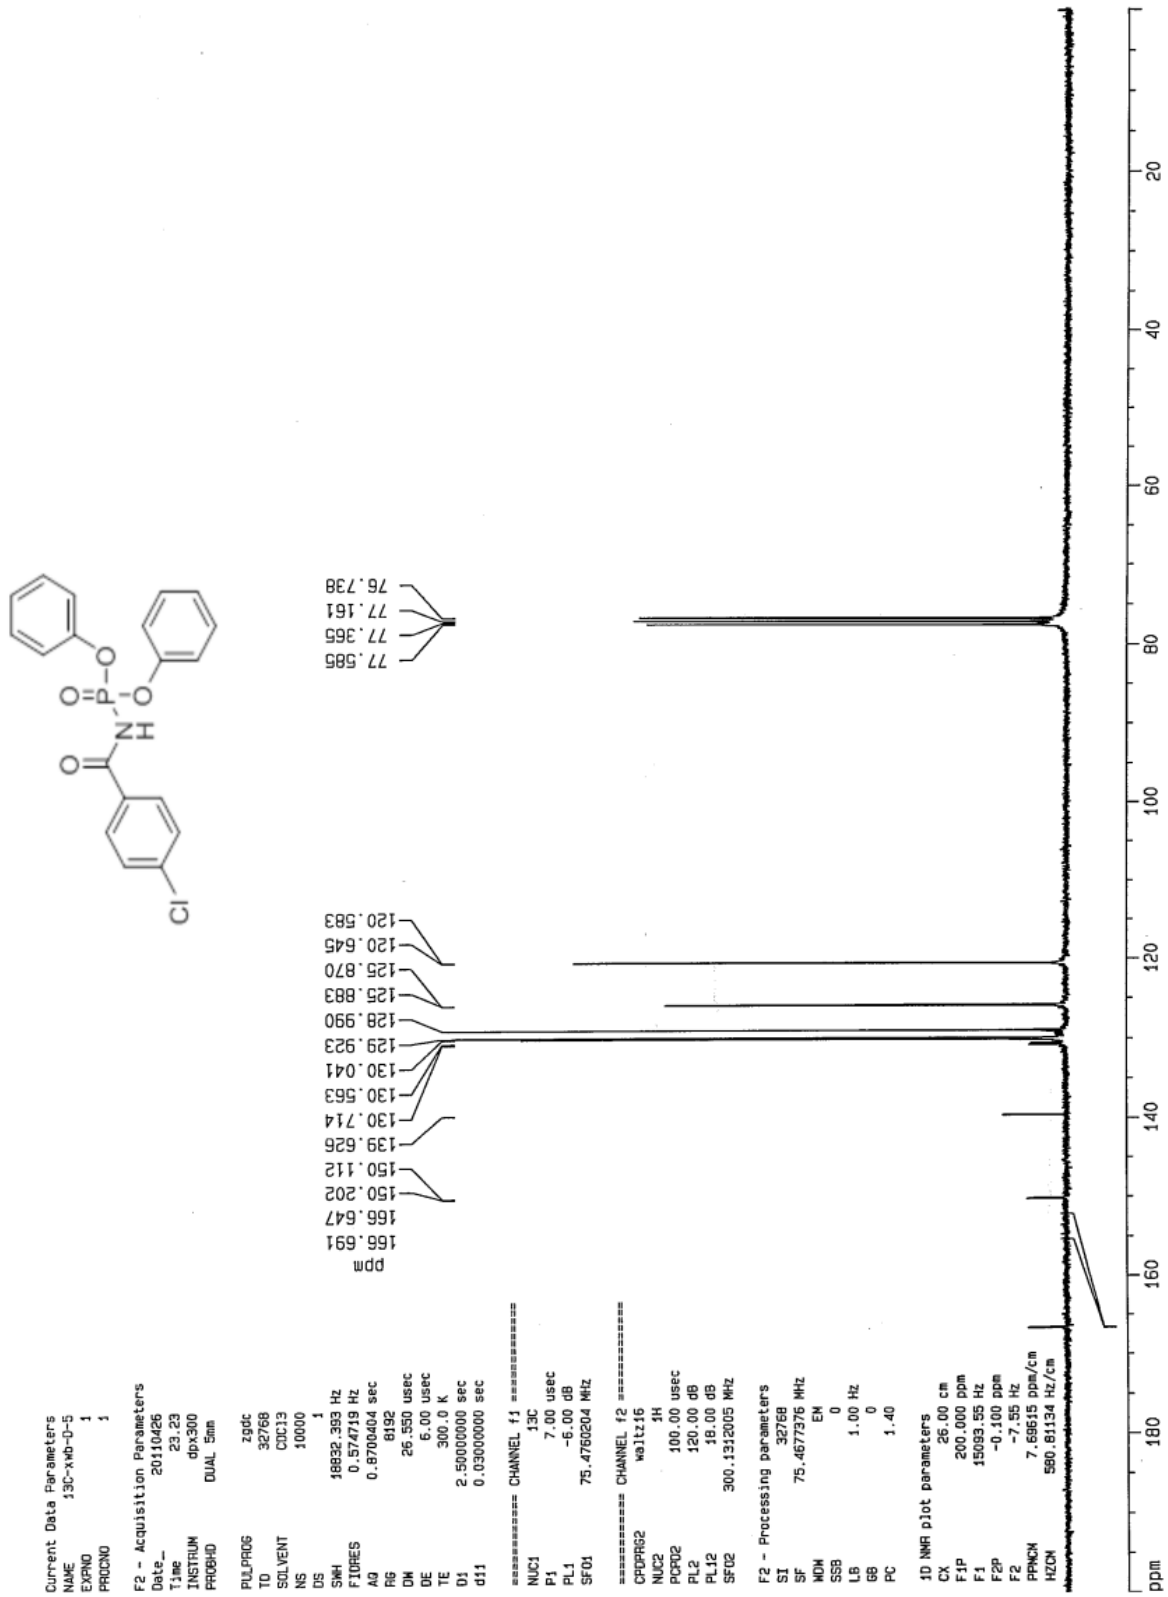



BRUKER

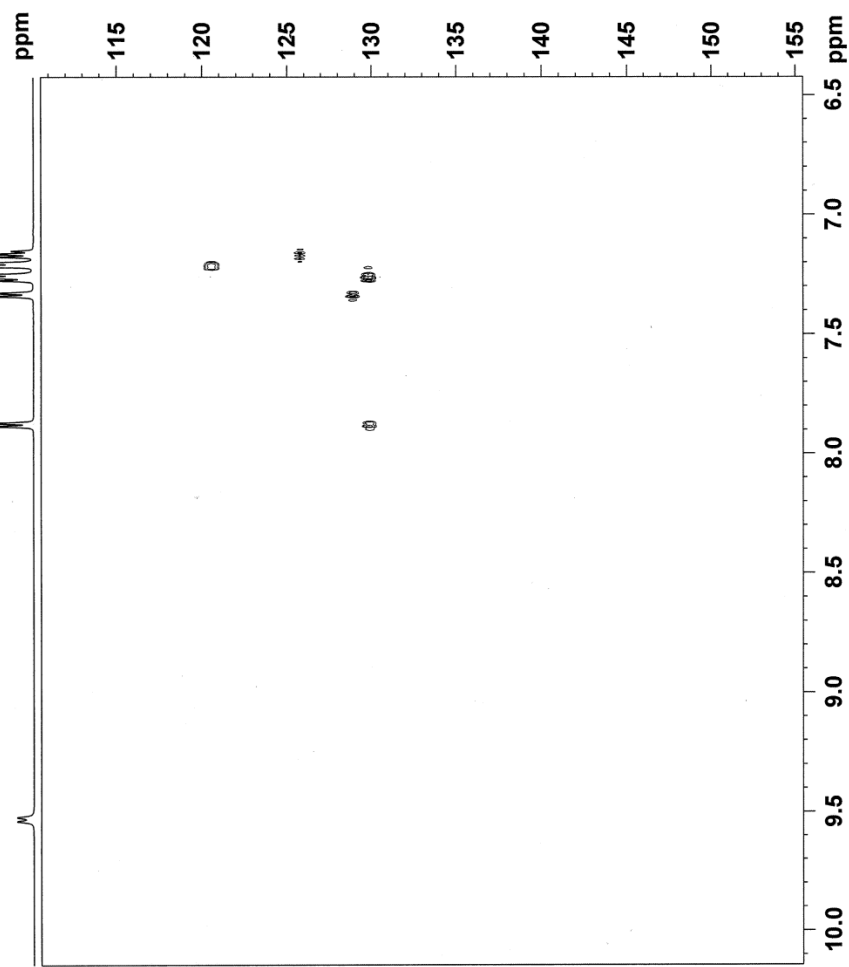

S40





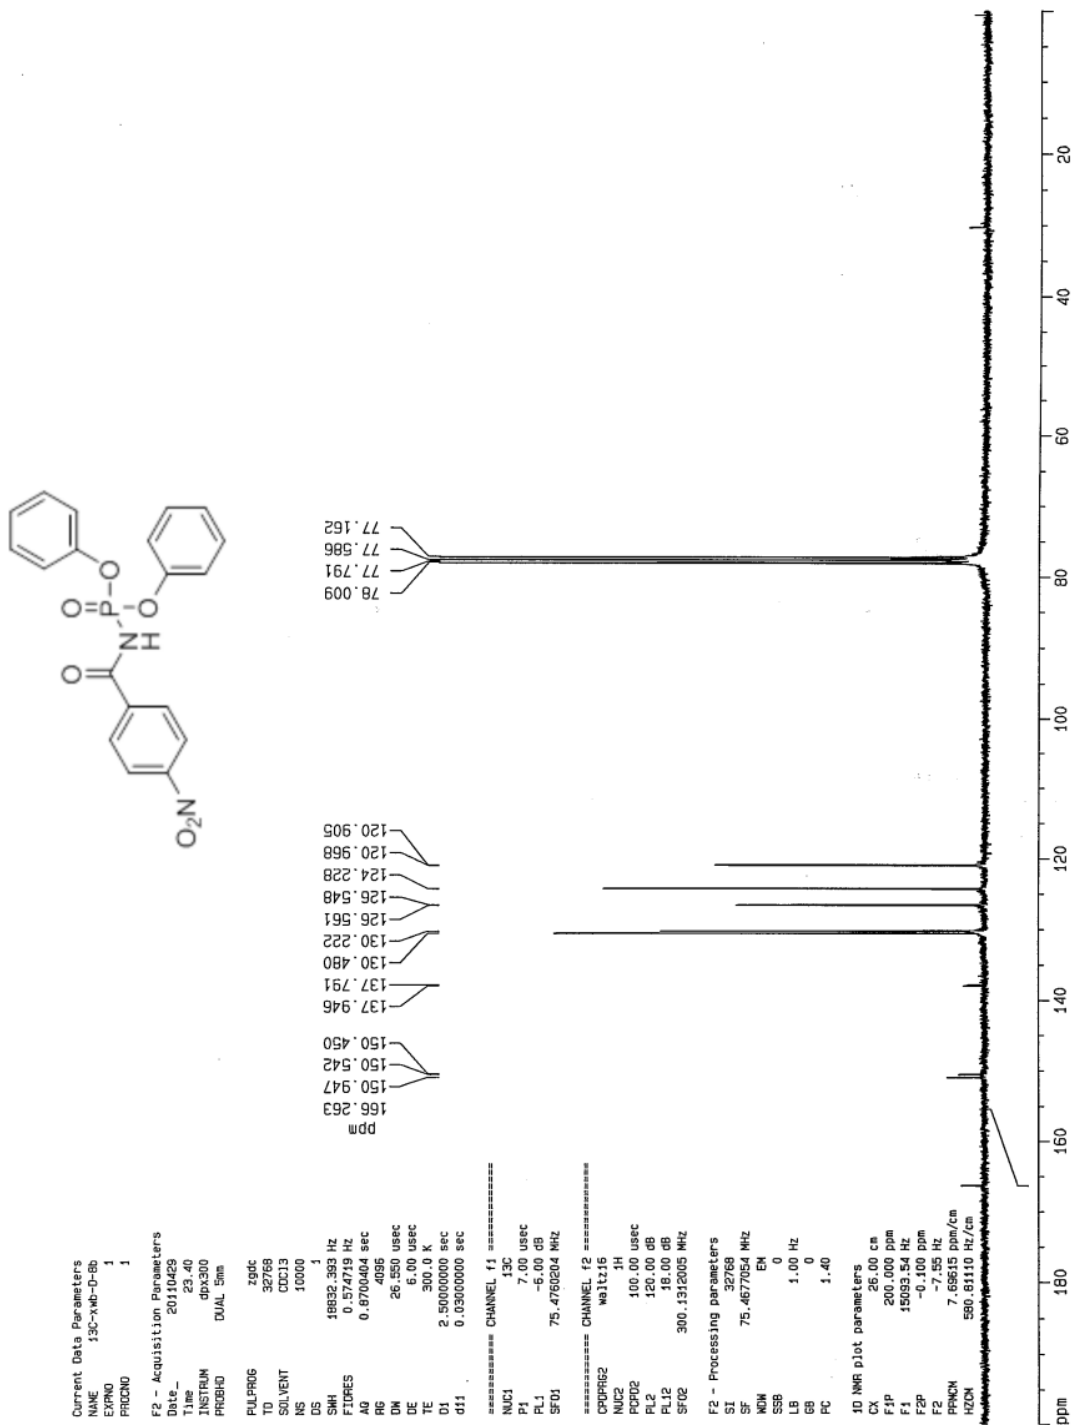

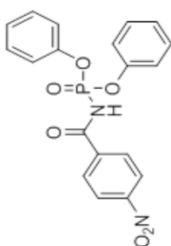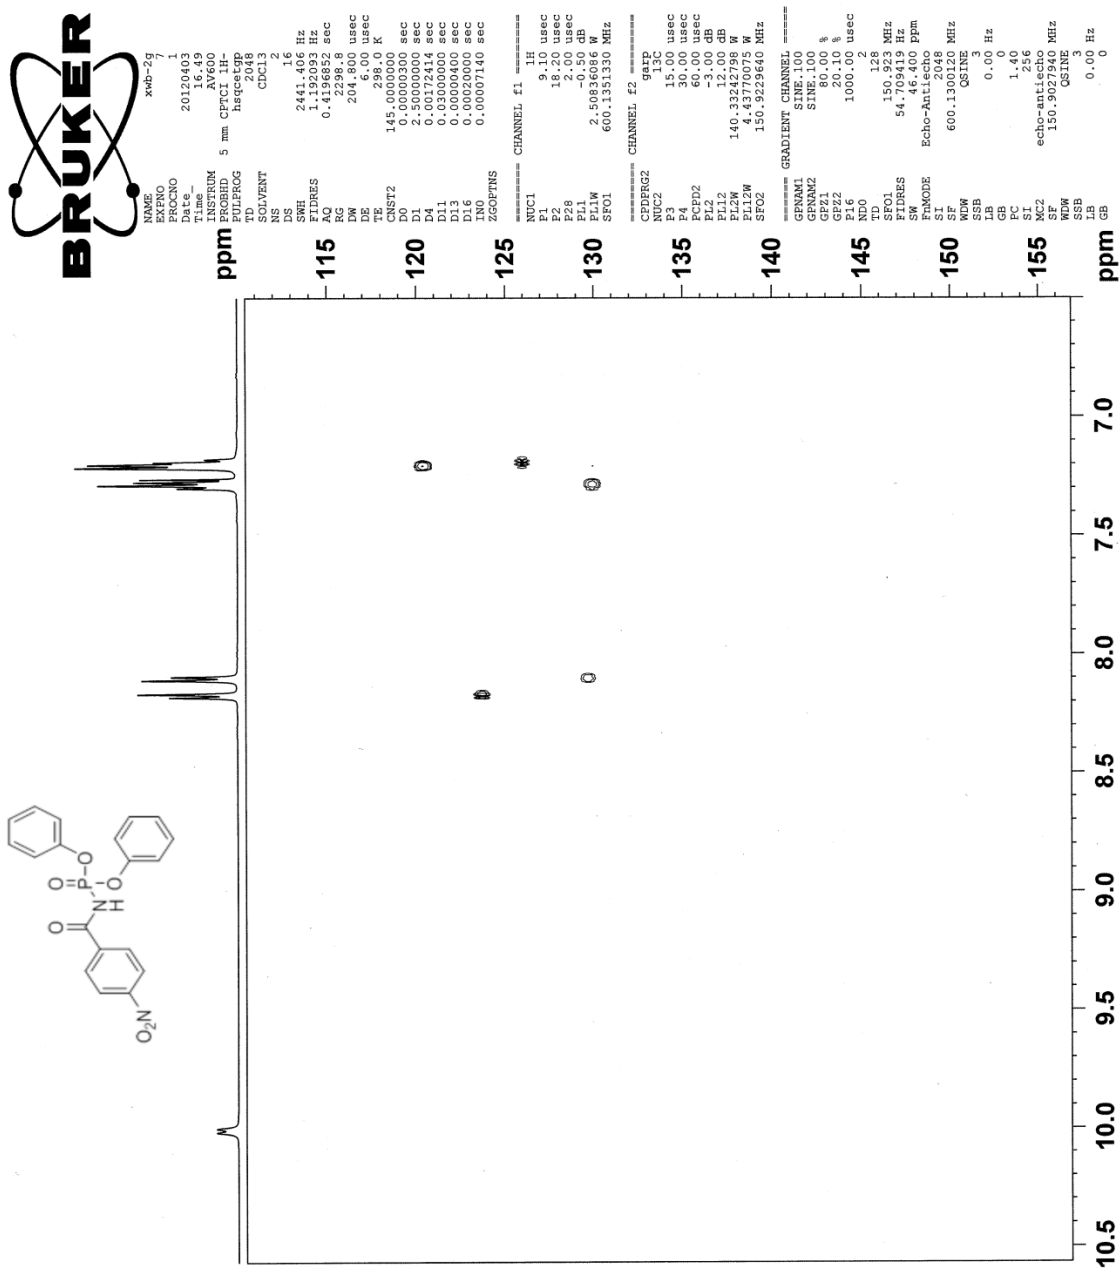

Diphenyl 2-naphthoylphosphoramidate 2h

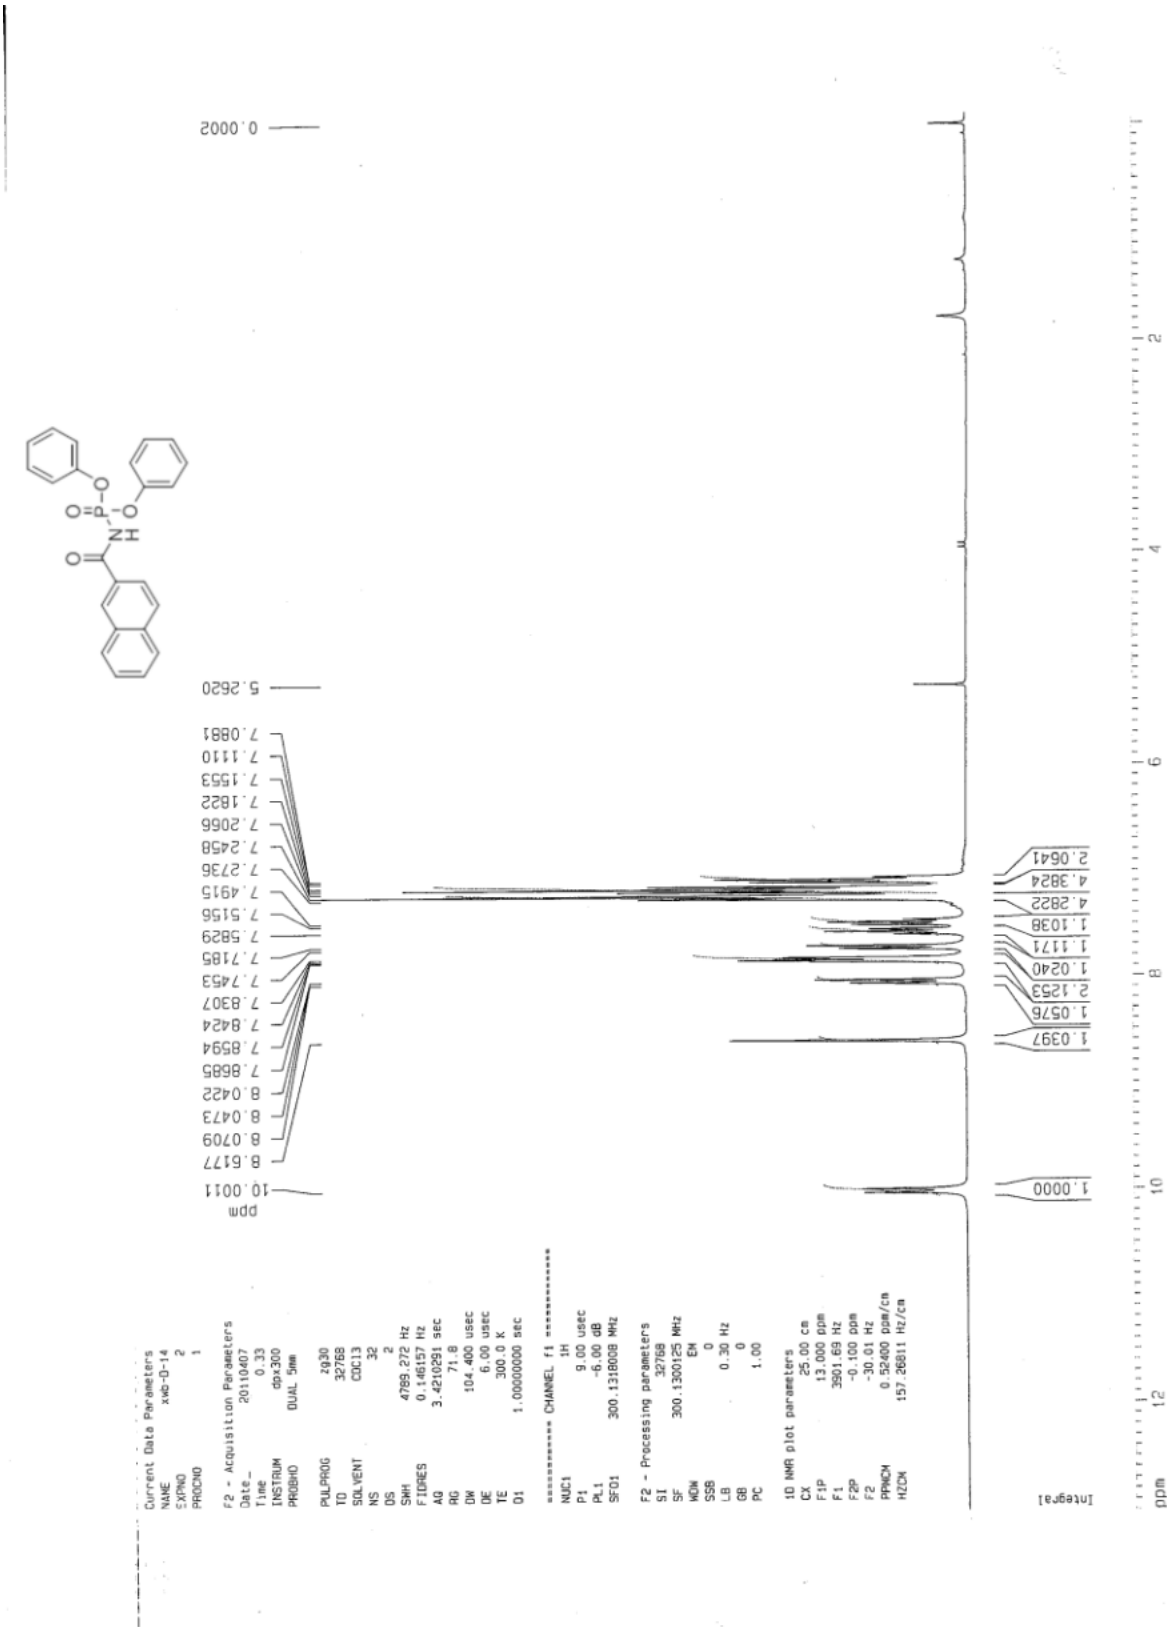

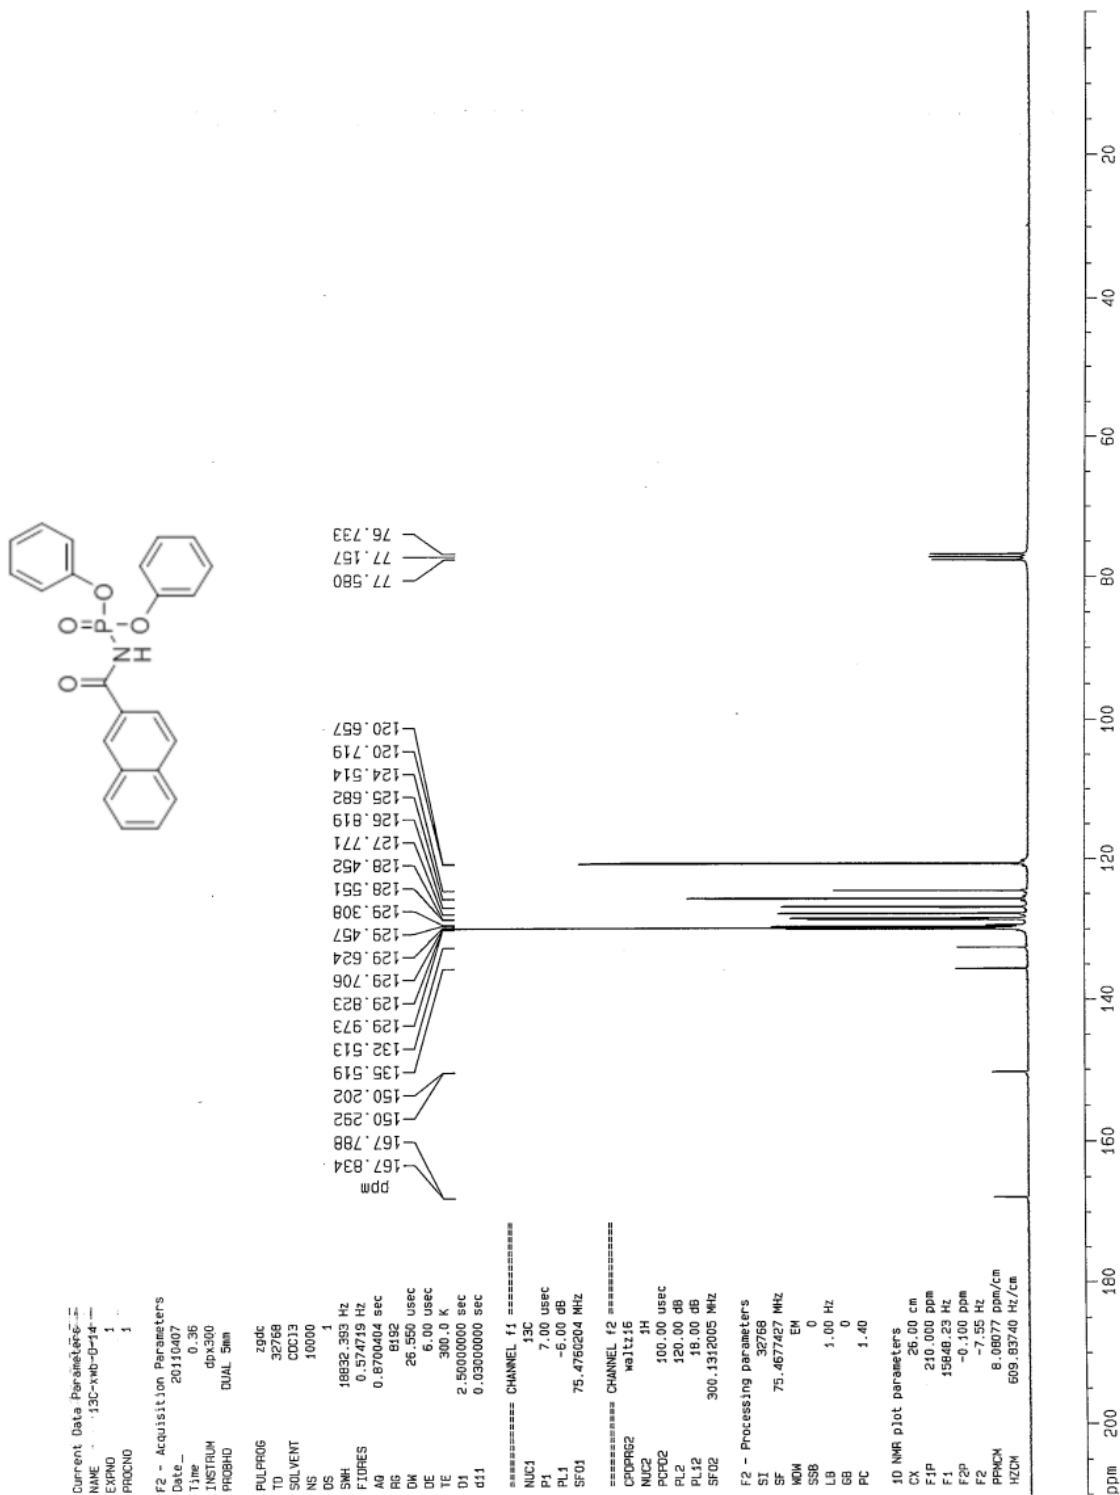

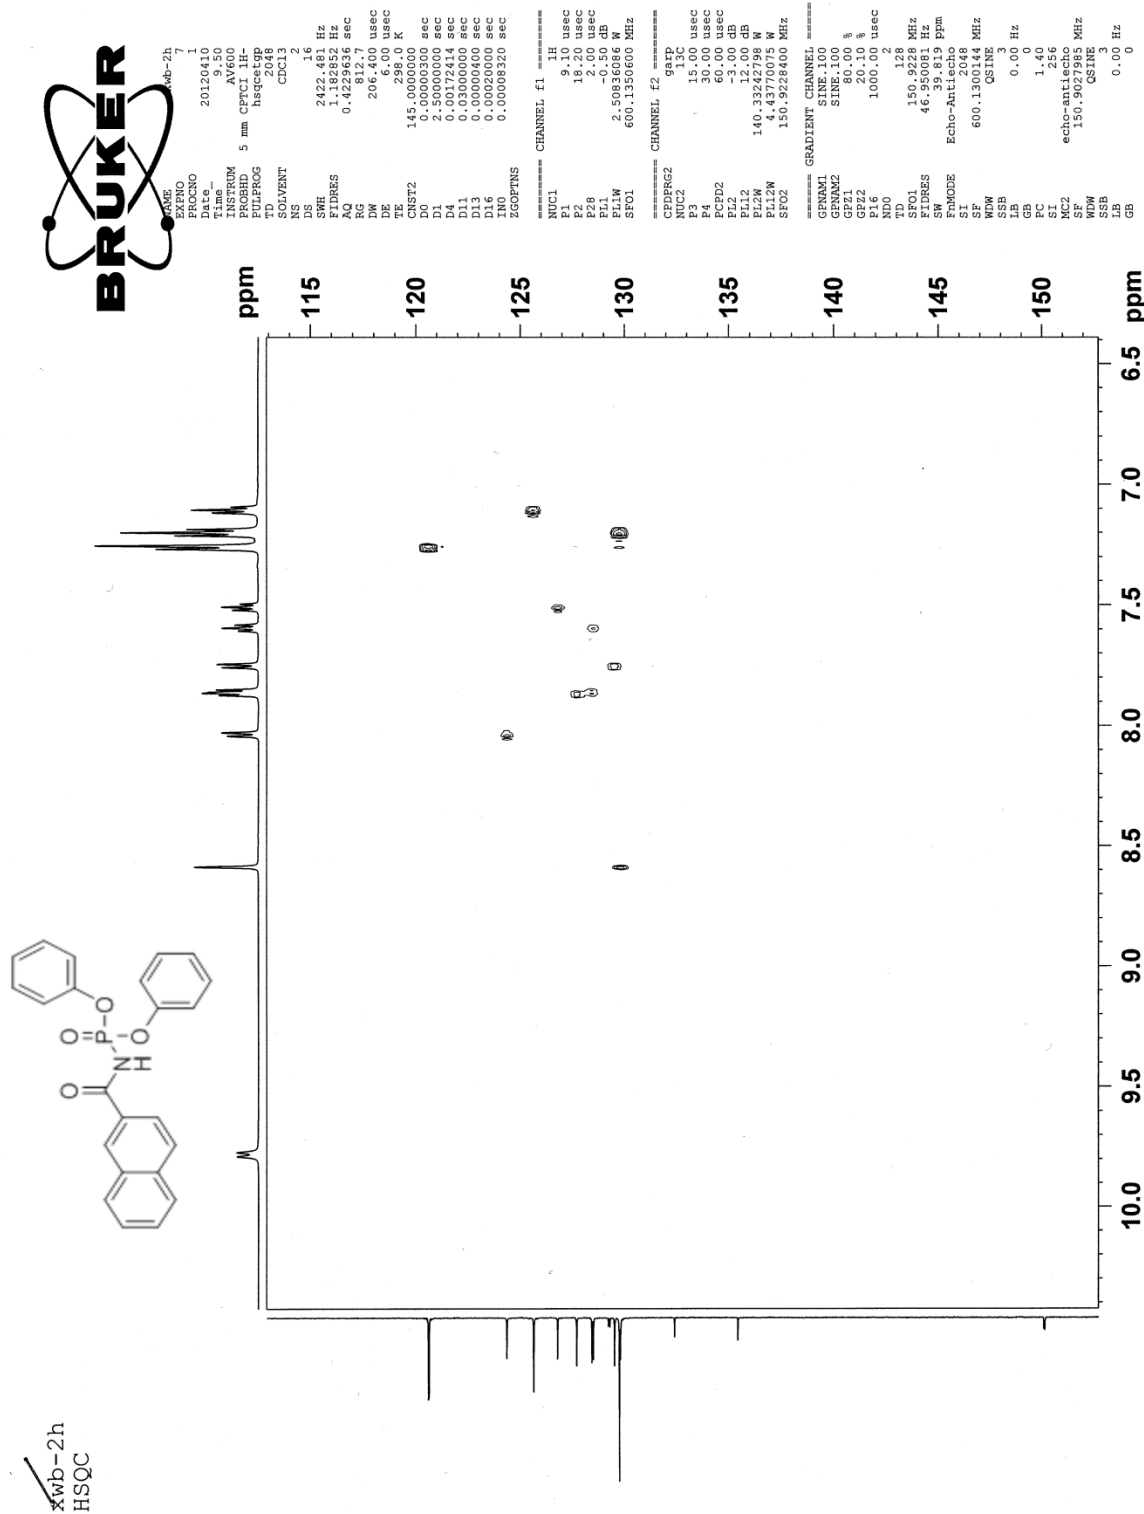

Diphenyl furan-2-carbonylphosphoramidate 2i

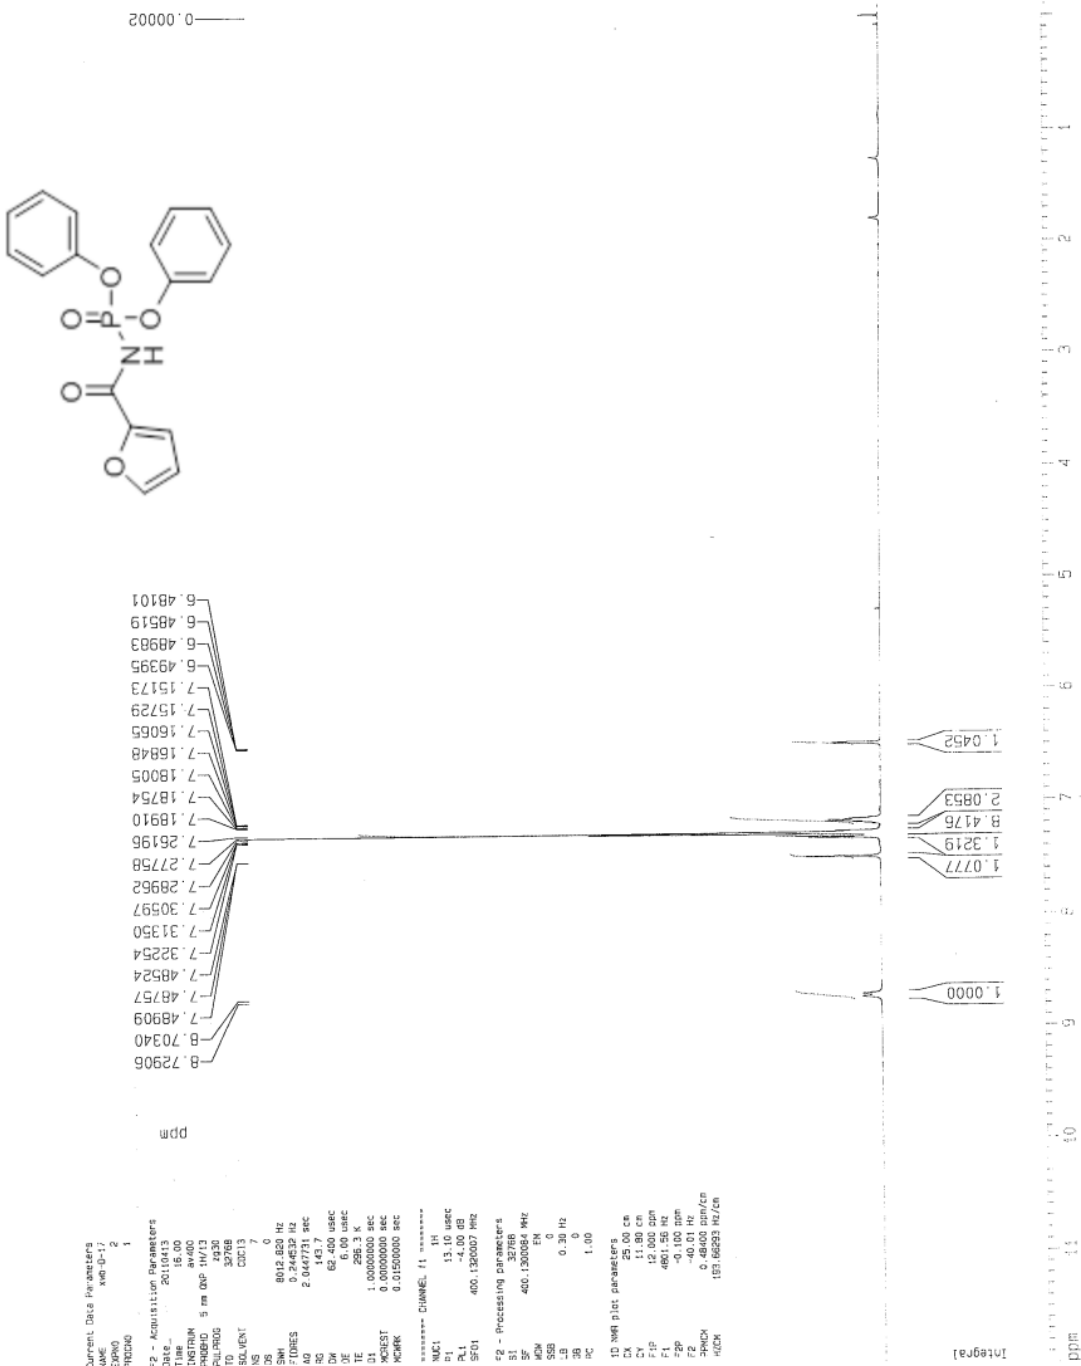

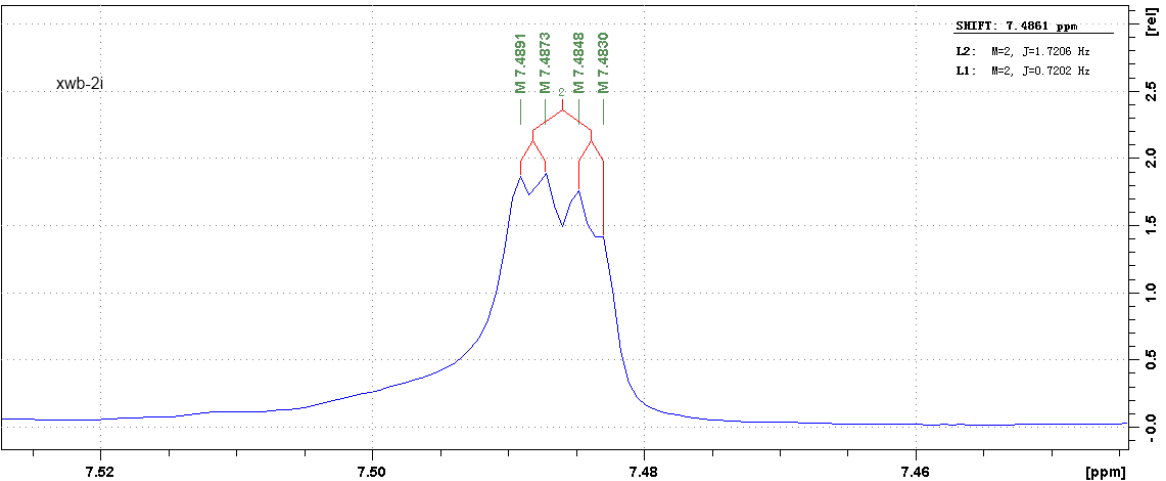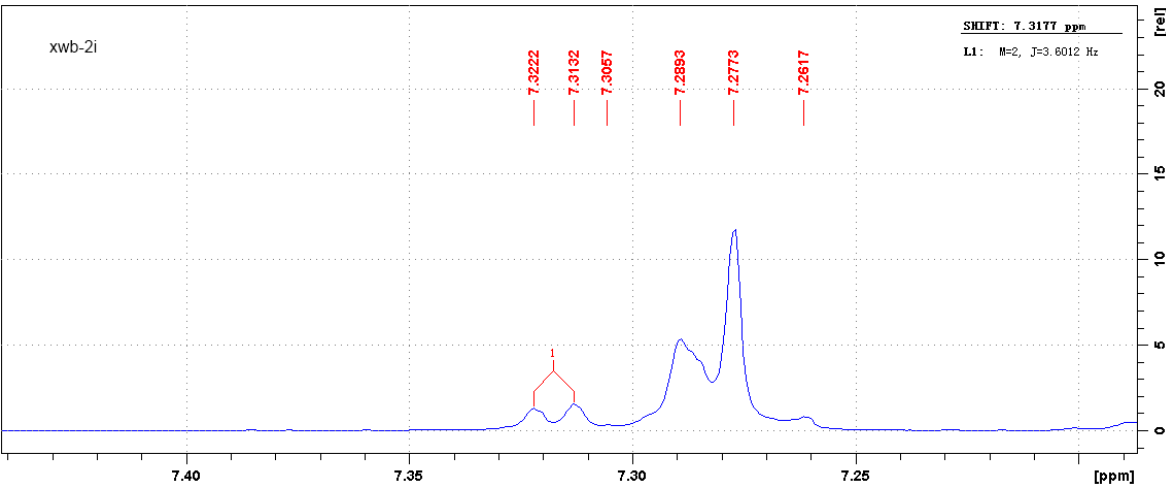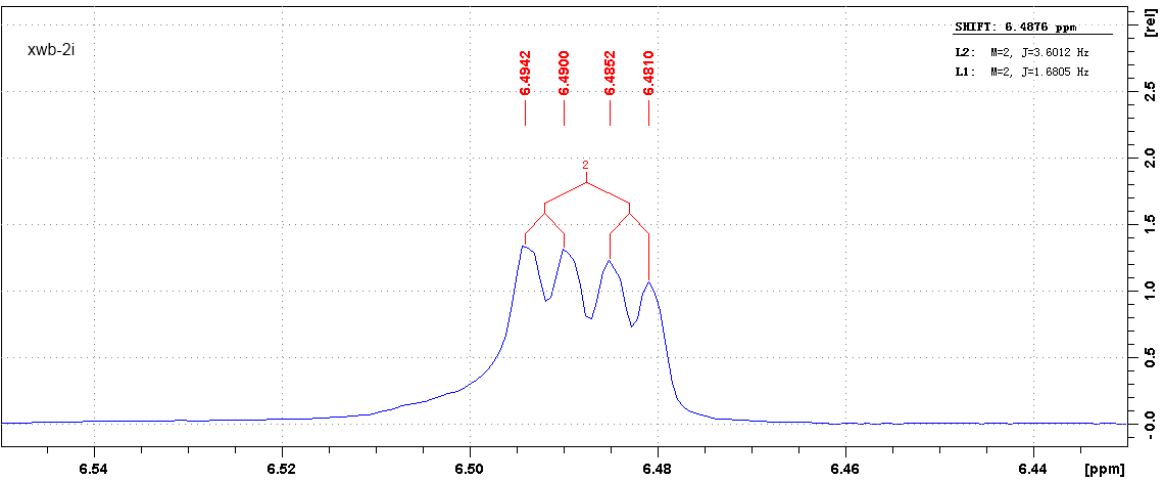







**BRUKER**

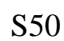

Diphenylcinnamoylphosphoramidate 2j

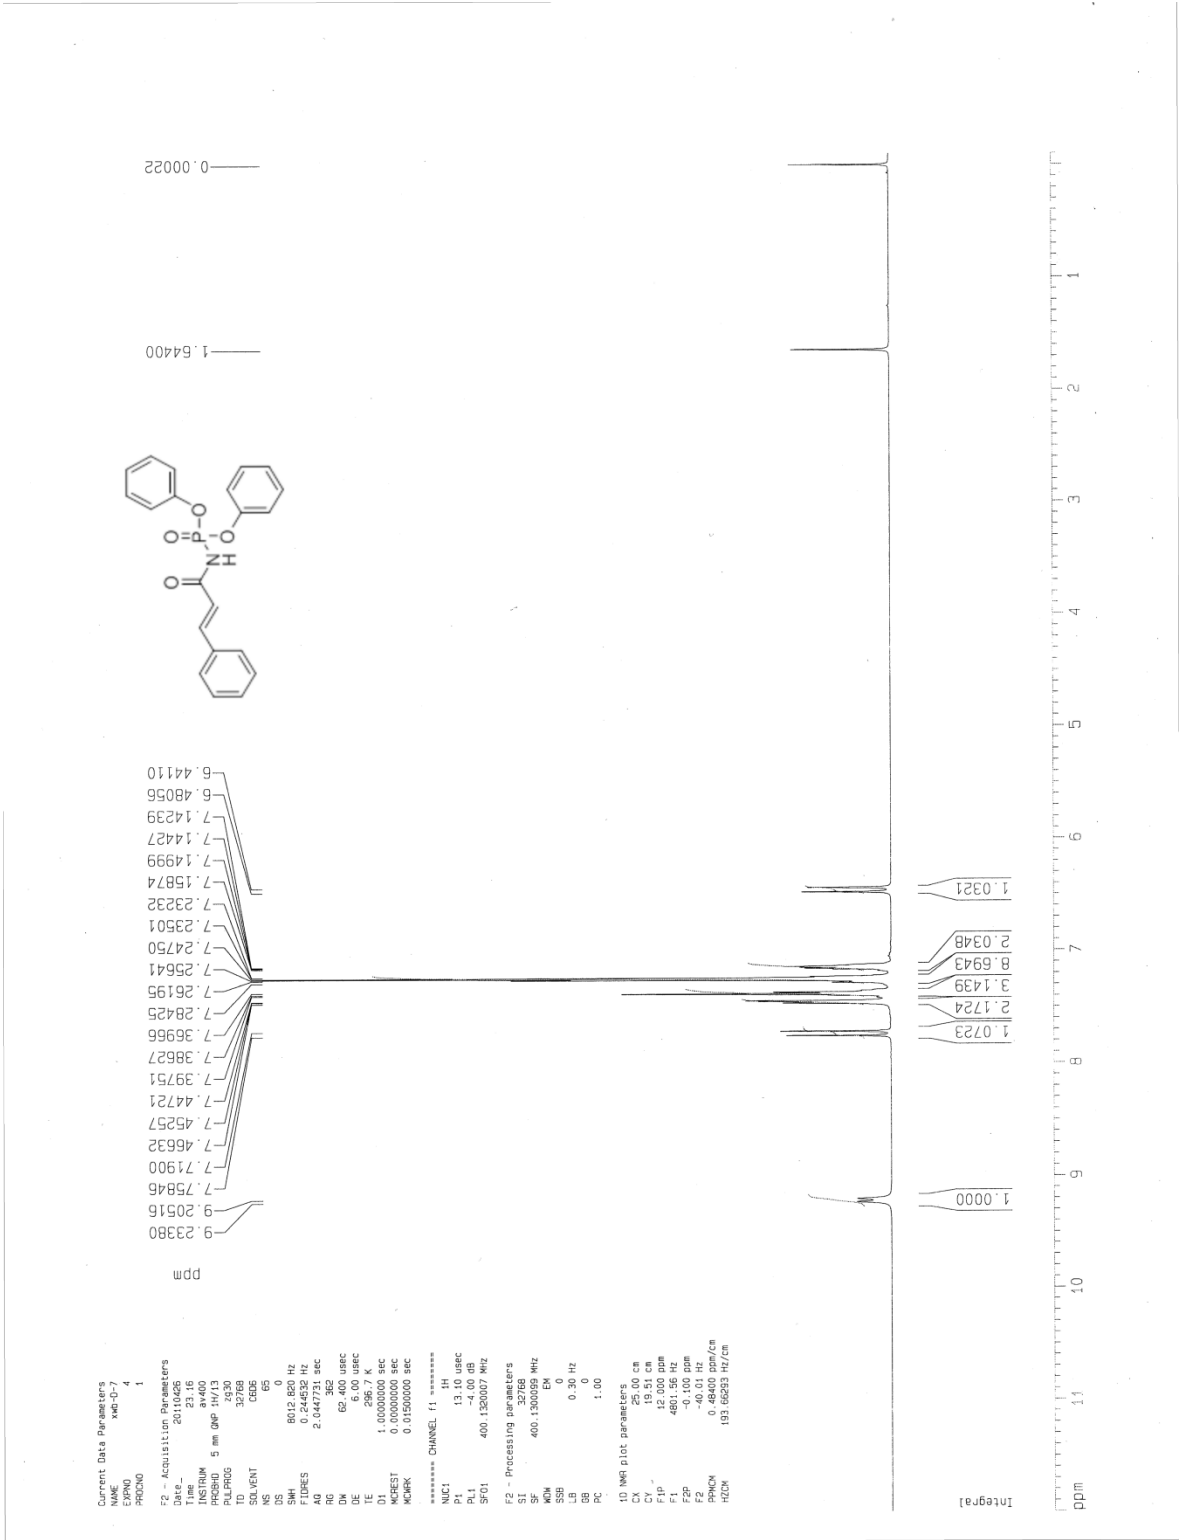

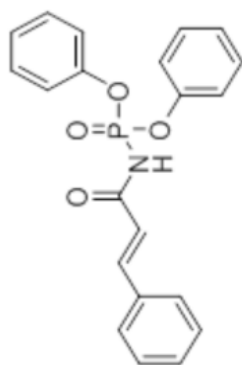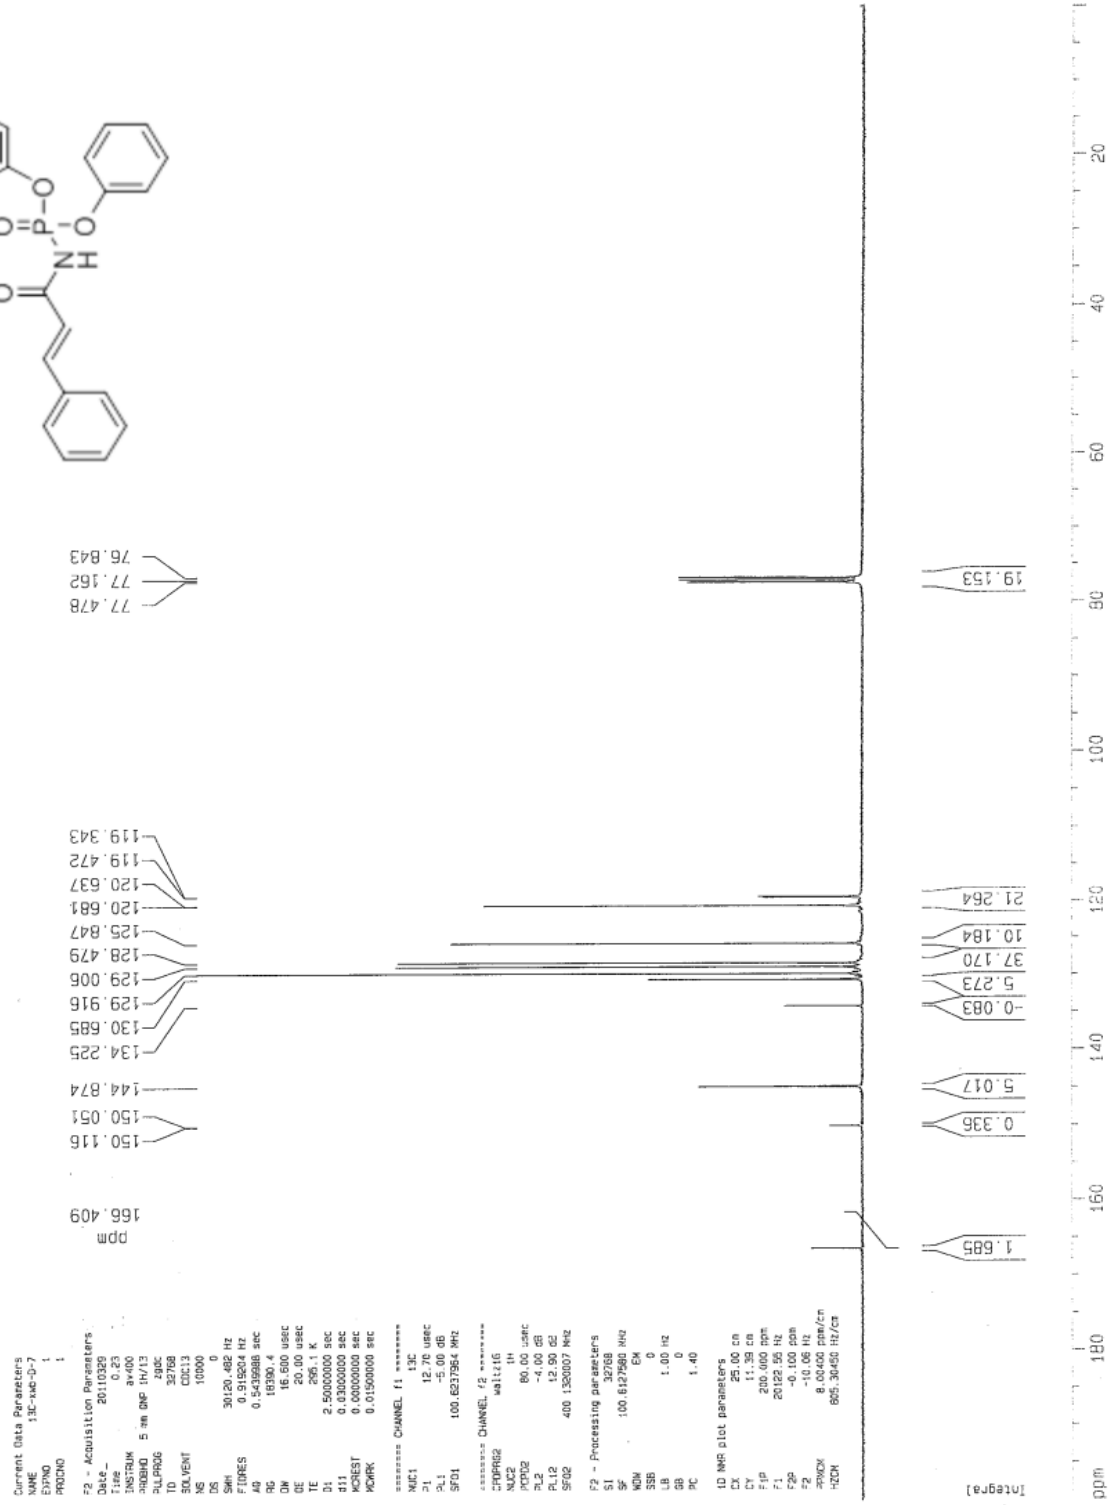

Current Data Parameters  
Name: 13C-MS-0-1  
PROCNO: 1  
F2 - Acquisition Parameters  
Date\_: 20110329  
Time: 0.23  
INSTRUM: spect  
PROBHD: 5 mm QNP 1H/1  
PULPROG: zgpg30  
TD: 32768  
SOLVENT: CDCl<sub>3</sub>  
NS: 10000  
DS: 0  
SWH: 30120.482 Hz  
FIDRES: 0.919004 Hz  
AQ: 0.543888 sec  
RG: 183.000  
DE: 16.600 usec  
TE: 295.1 K  
D1: 2.5000000 sec  
d11: 0.0300000 sec  
PCREST: 0.0000000 sec  
PCPRG2: 0.0150000 sec  
===== CHANNEL f1 =====  
NUC1: 13C  
P1: 12.70 usec  
PL1: -5.00 dB  
SFO1: 100.6237964 MHz  
===== CHANNEL f2 =====  
CHPROG2: waltz16  
NUC2: 1H  
P2: 80.00 usec  
PL2: -4.00 dB  
PL12: 12.50 dB  
SFO2: 400.130007 MHz  
F2 - Processing parameters  
SI: 32768  
SF: 100.6127980 MHz  
WDW: EM  
SSB: 0  
LB: 1.00 Hz  
GB: 0  
PC: 1.40  
ID NMR plot parameters  
CX: 25.00 cm  
CY: 11.35 cm  
FID: 2000000000  
F1: 2000000000  
F2: -10.00 Hz  
PCPRG2: 8.00400 pps/cm  
HZCN: 605.30450 Hz/cm

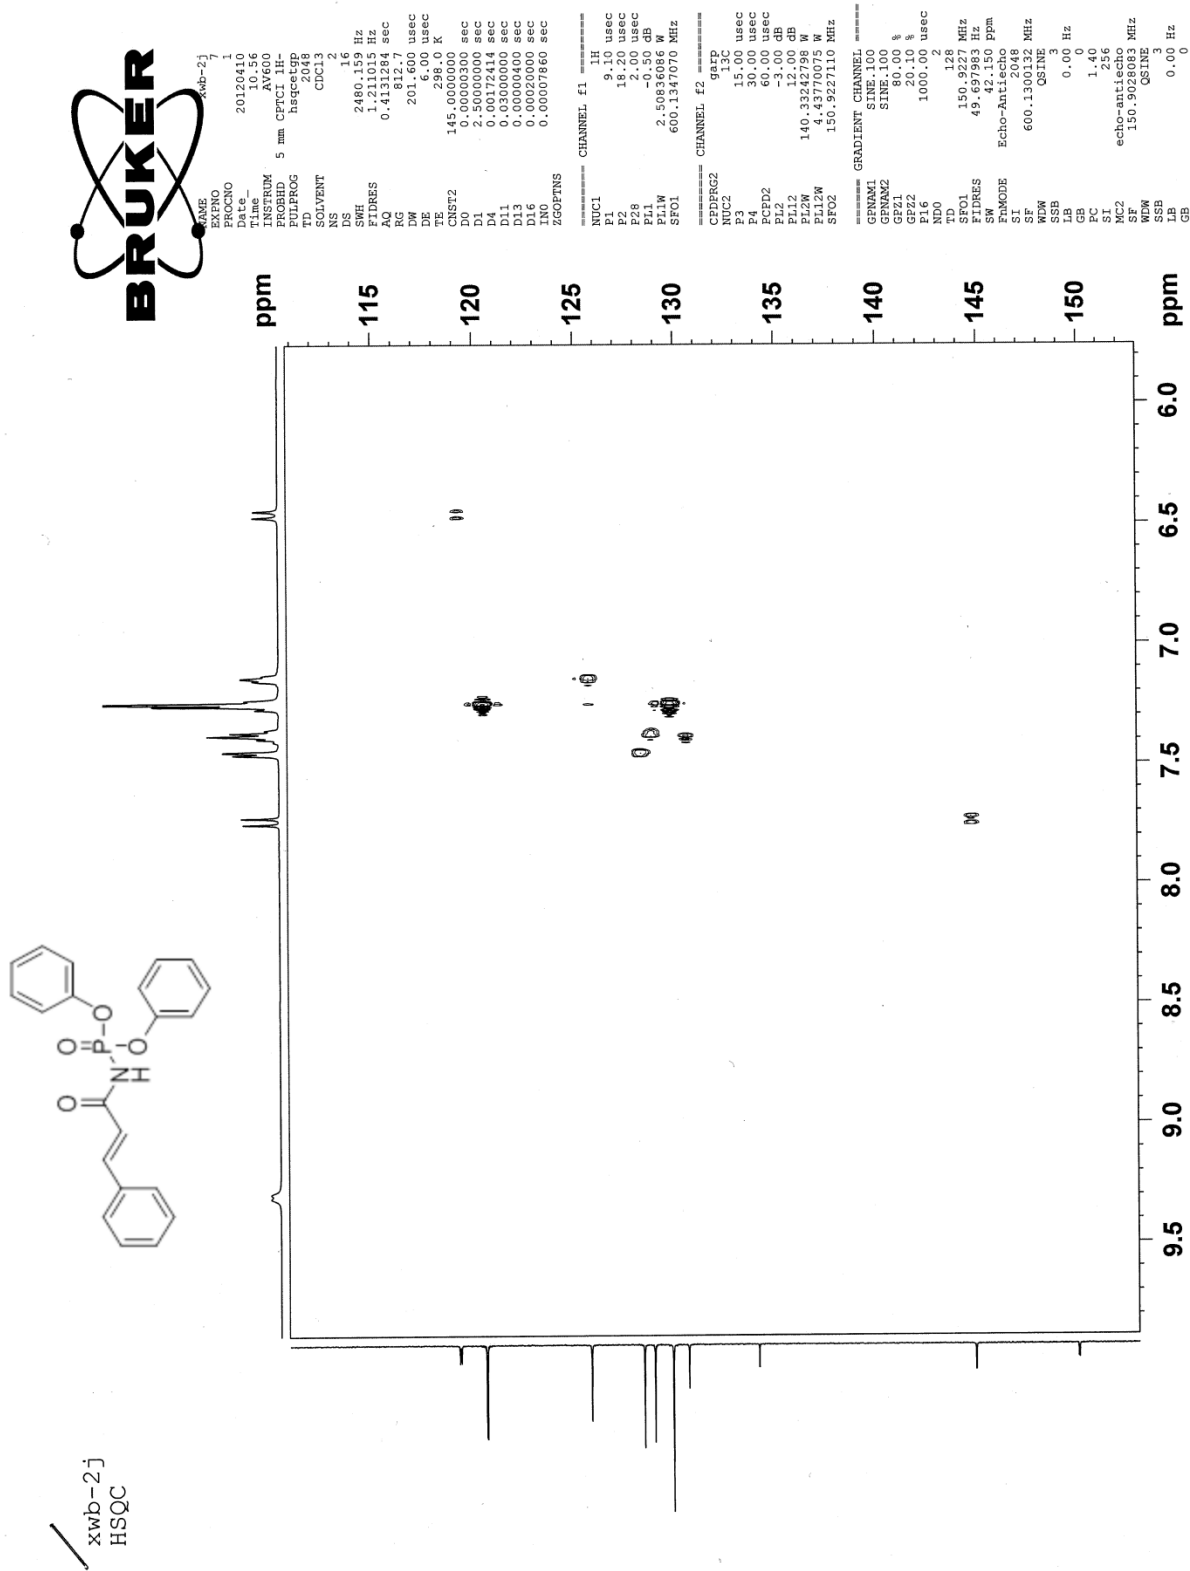

Diphenyl (3-methylbut-2-enyl)phosphoramidate 2k

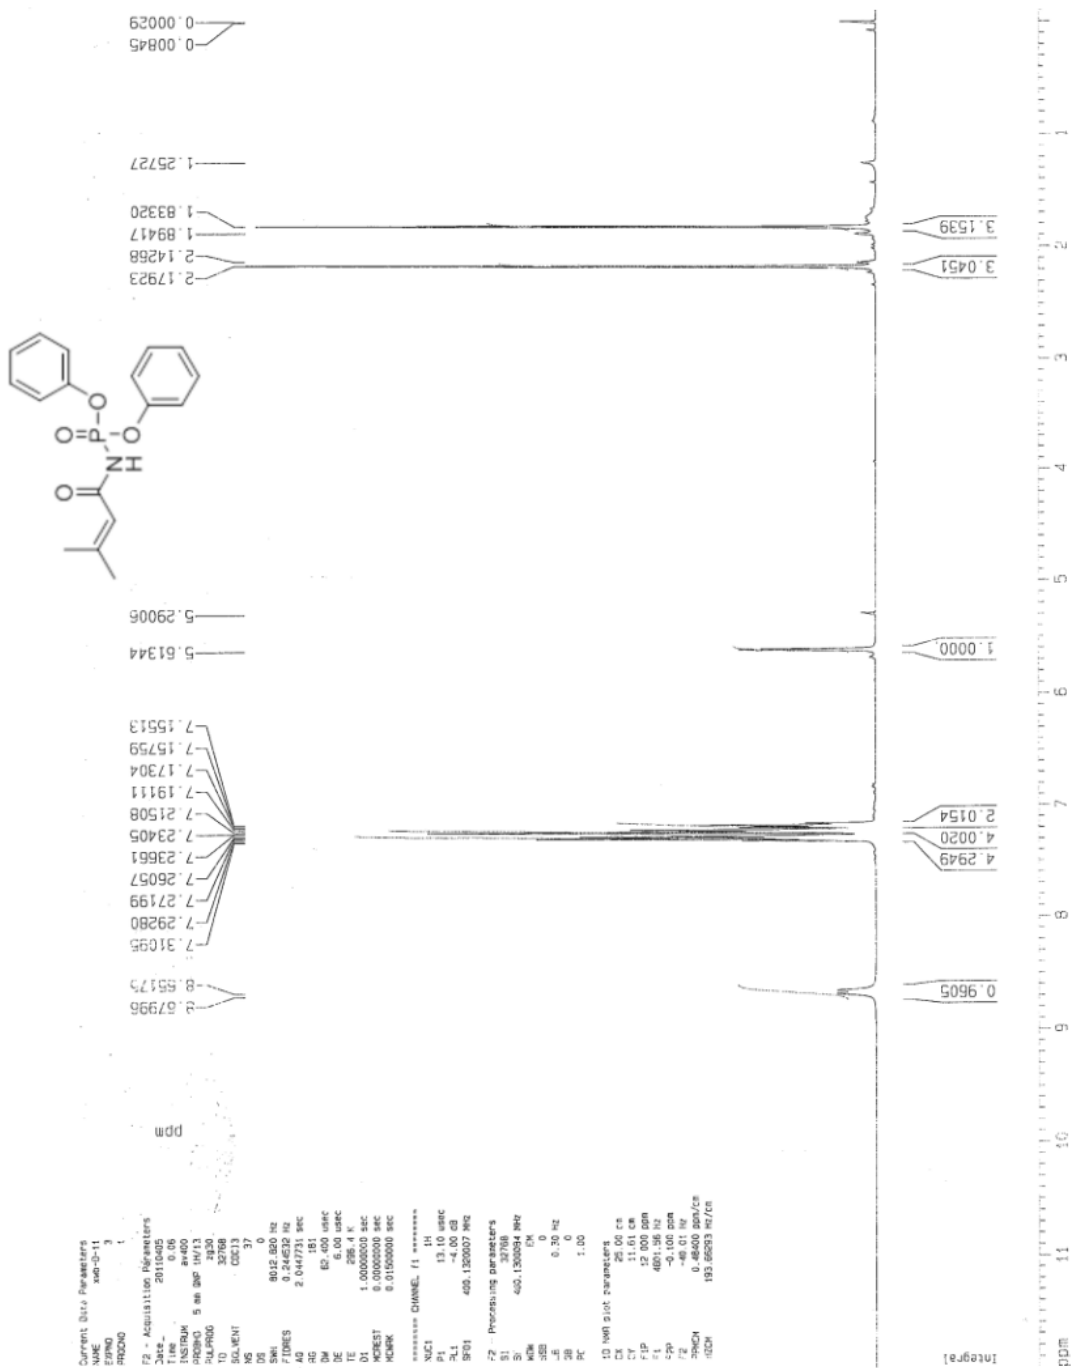

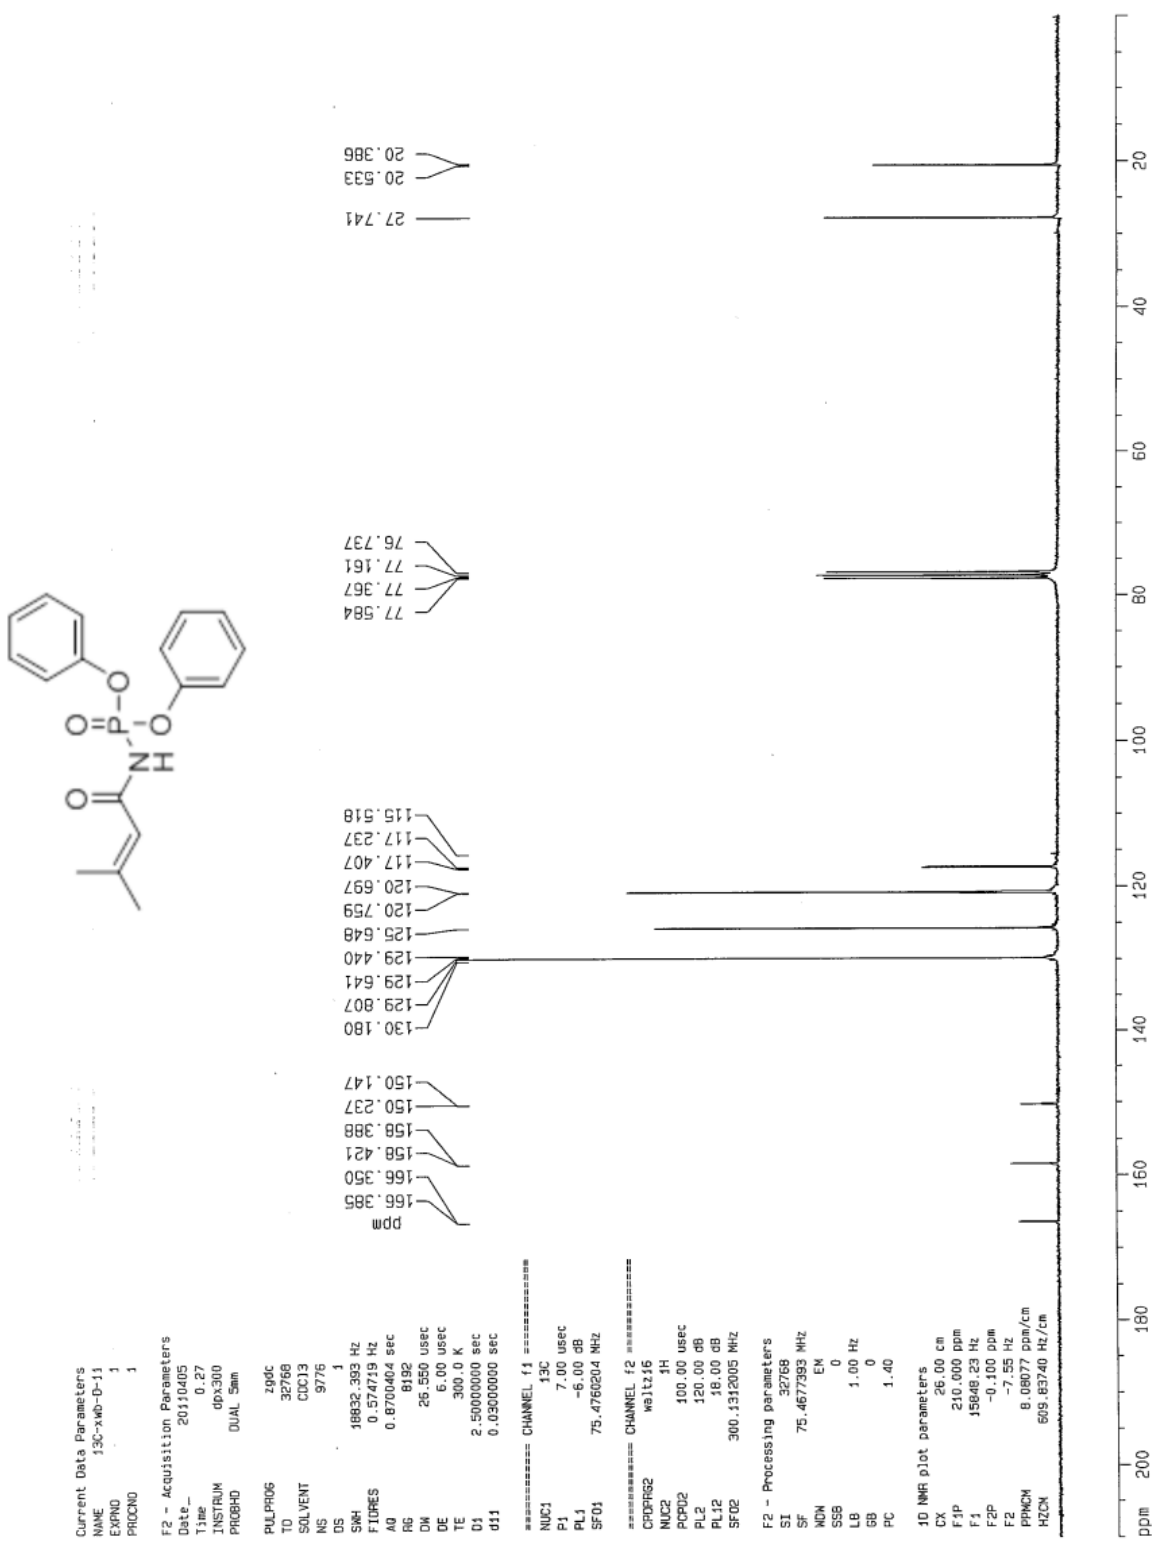

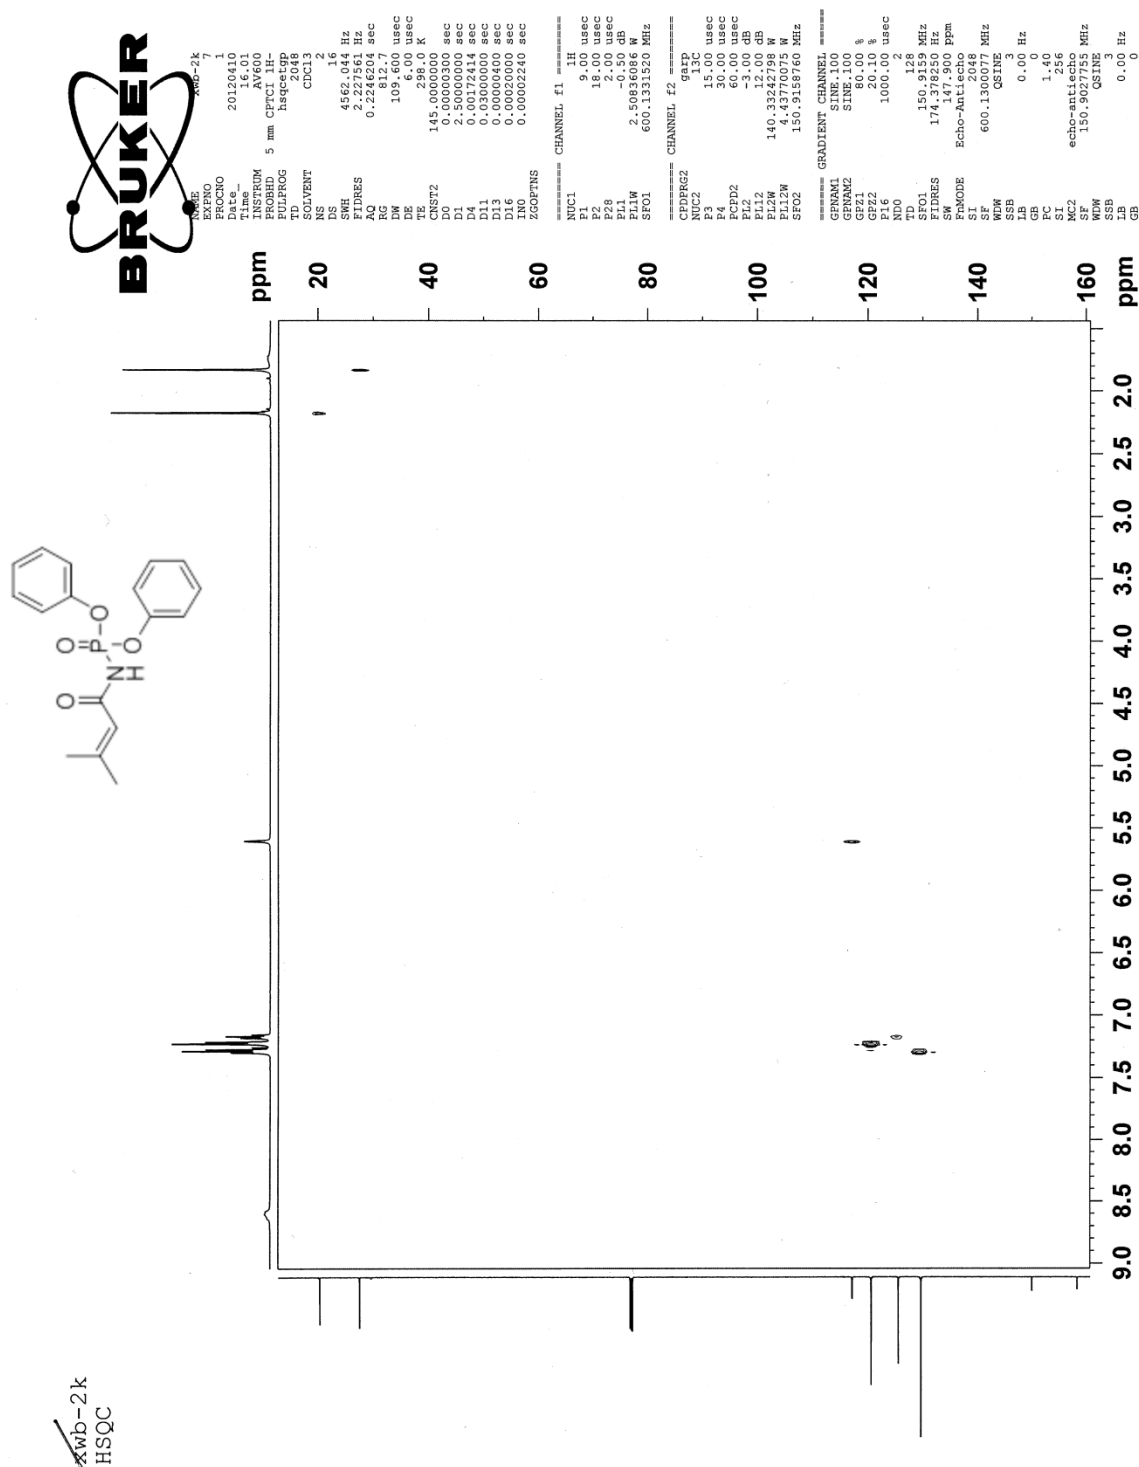



Diphenyl (5,6-dihydro-2H-pyran-3-carbonyl)phosphoramidate 2l

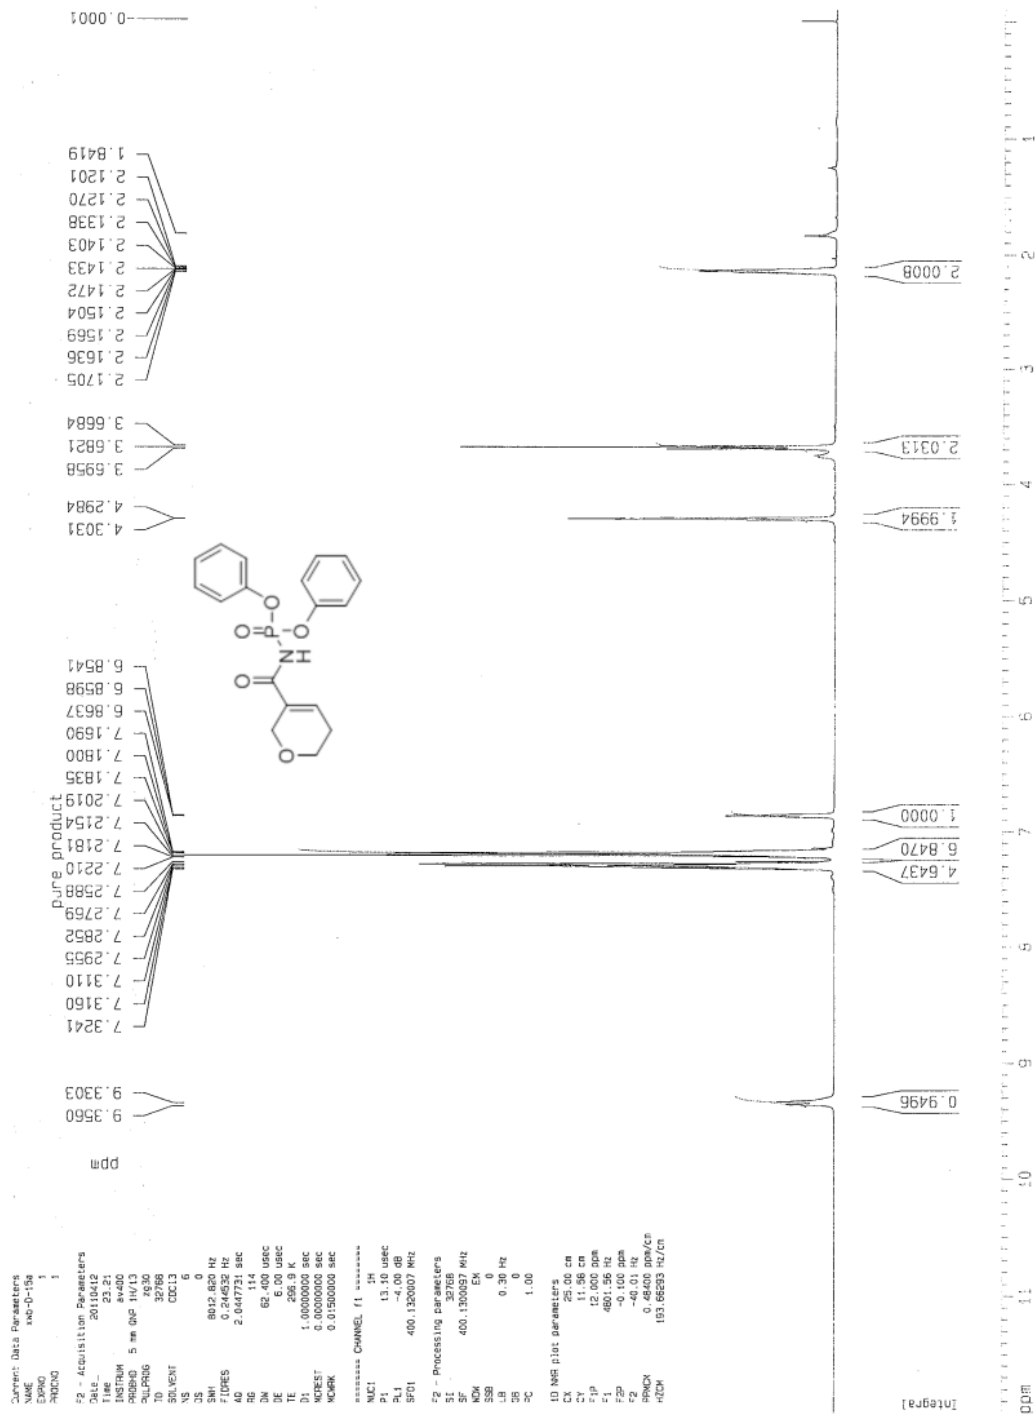

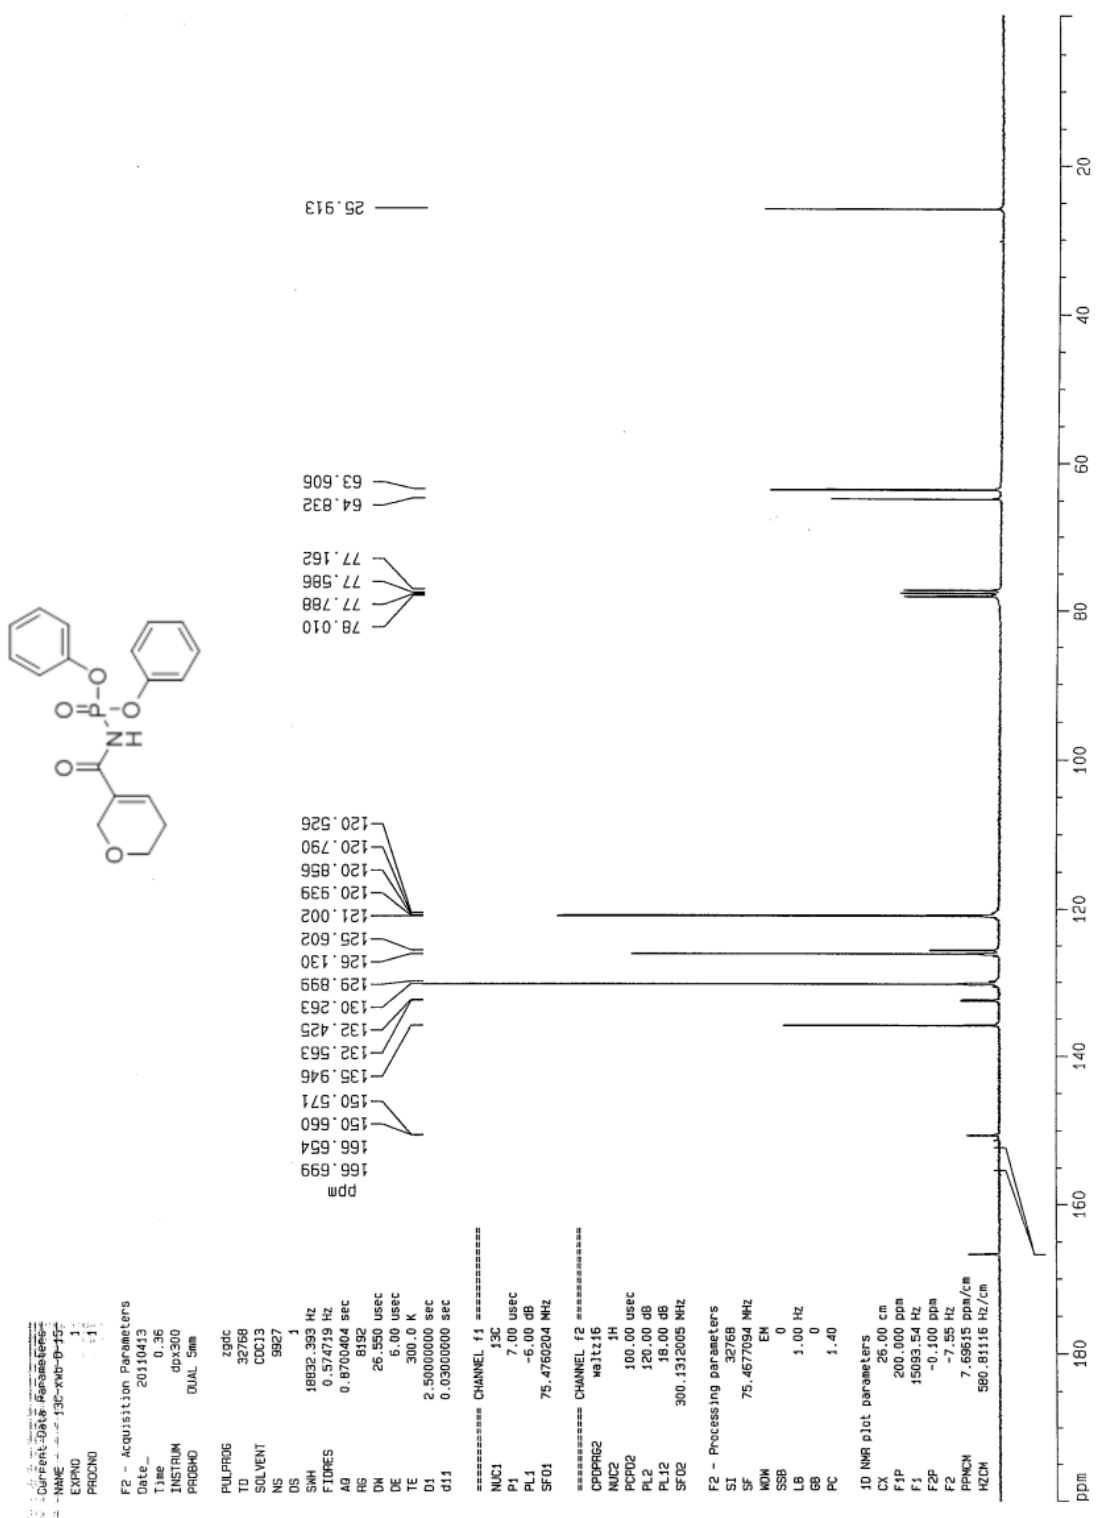

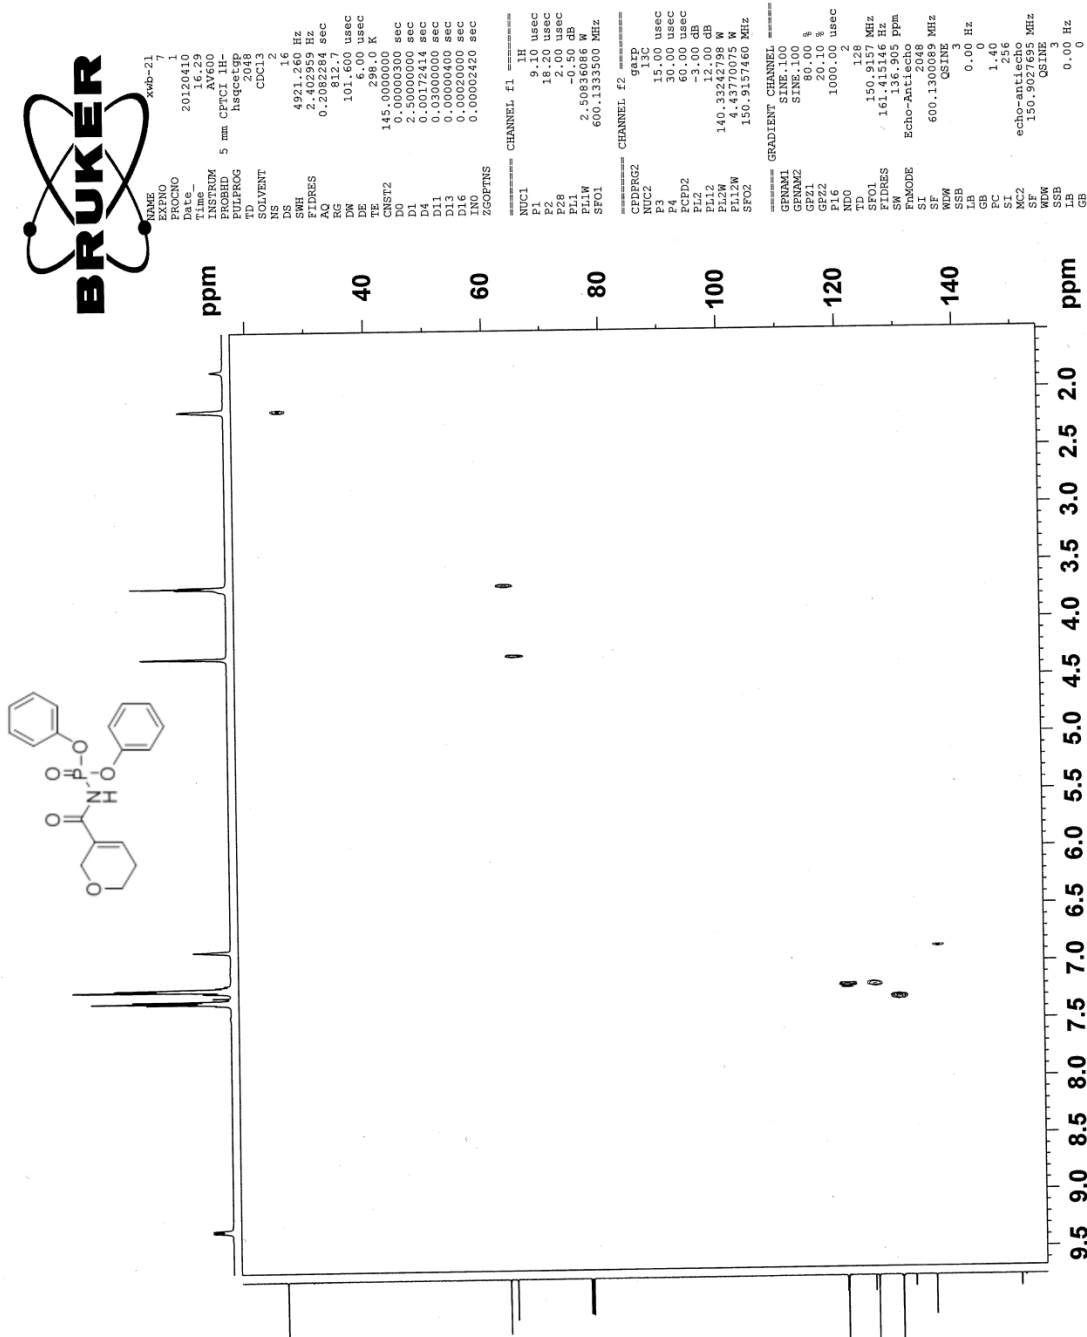

Diphenyloctanoylphosphoramidate 2m

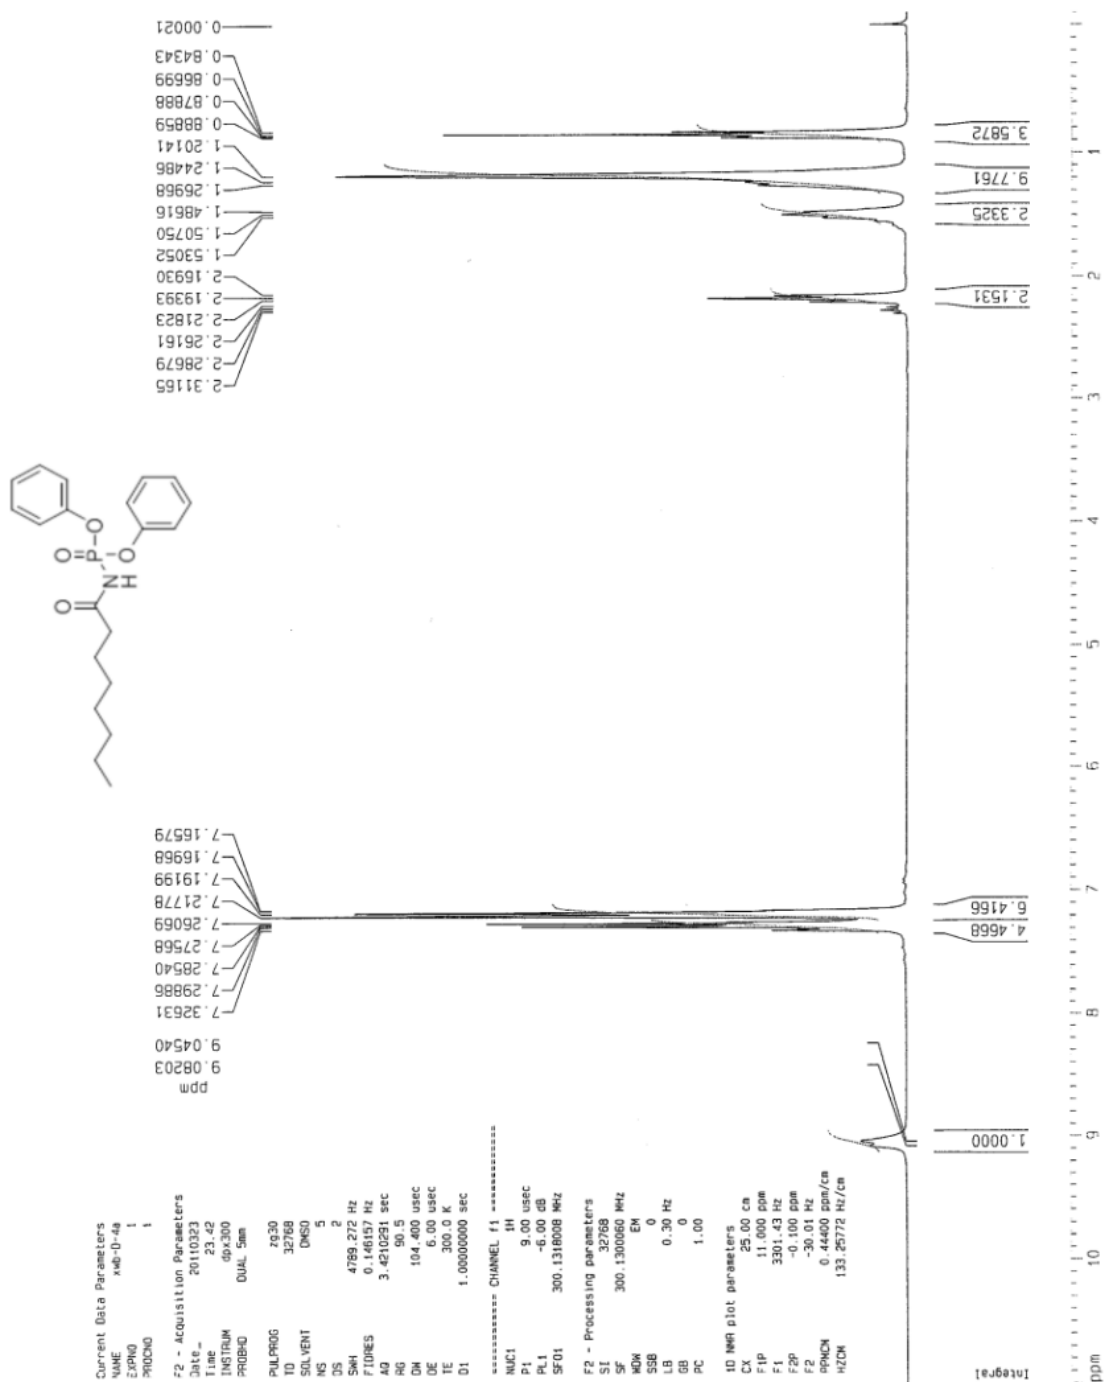

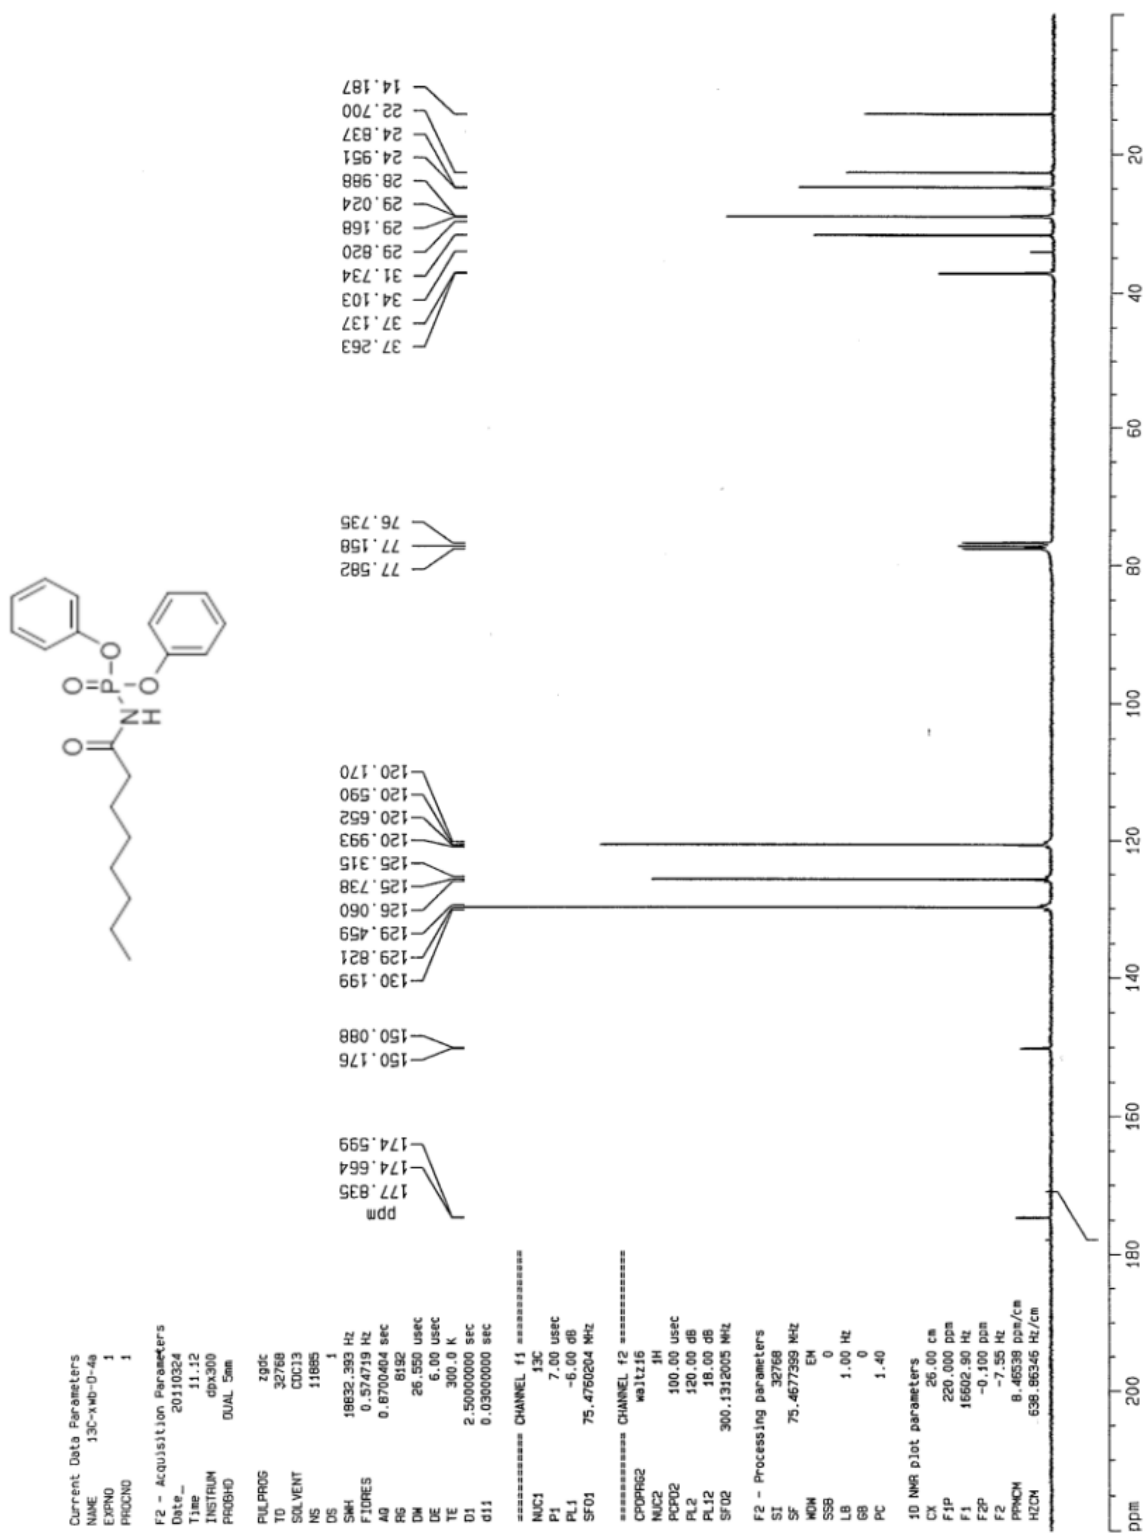

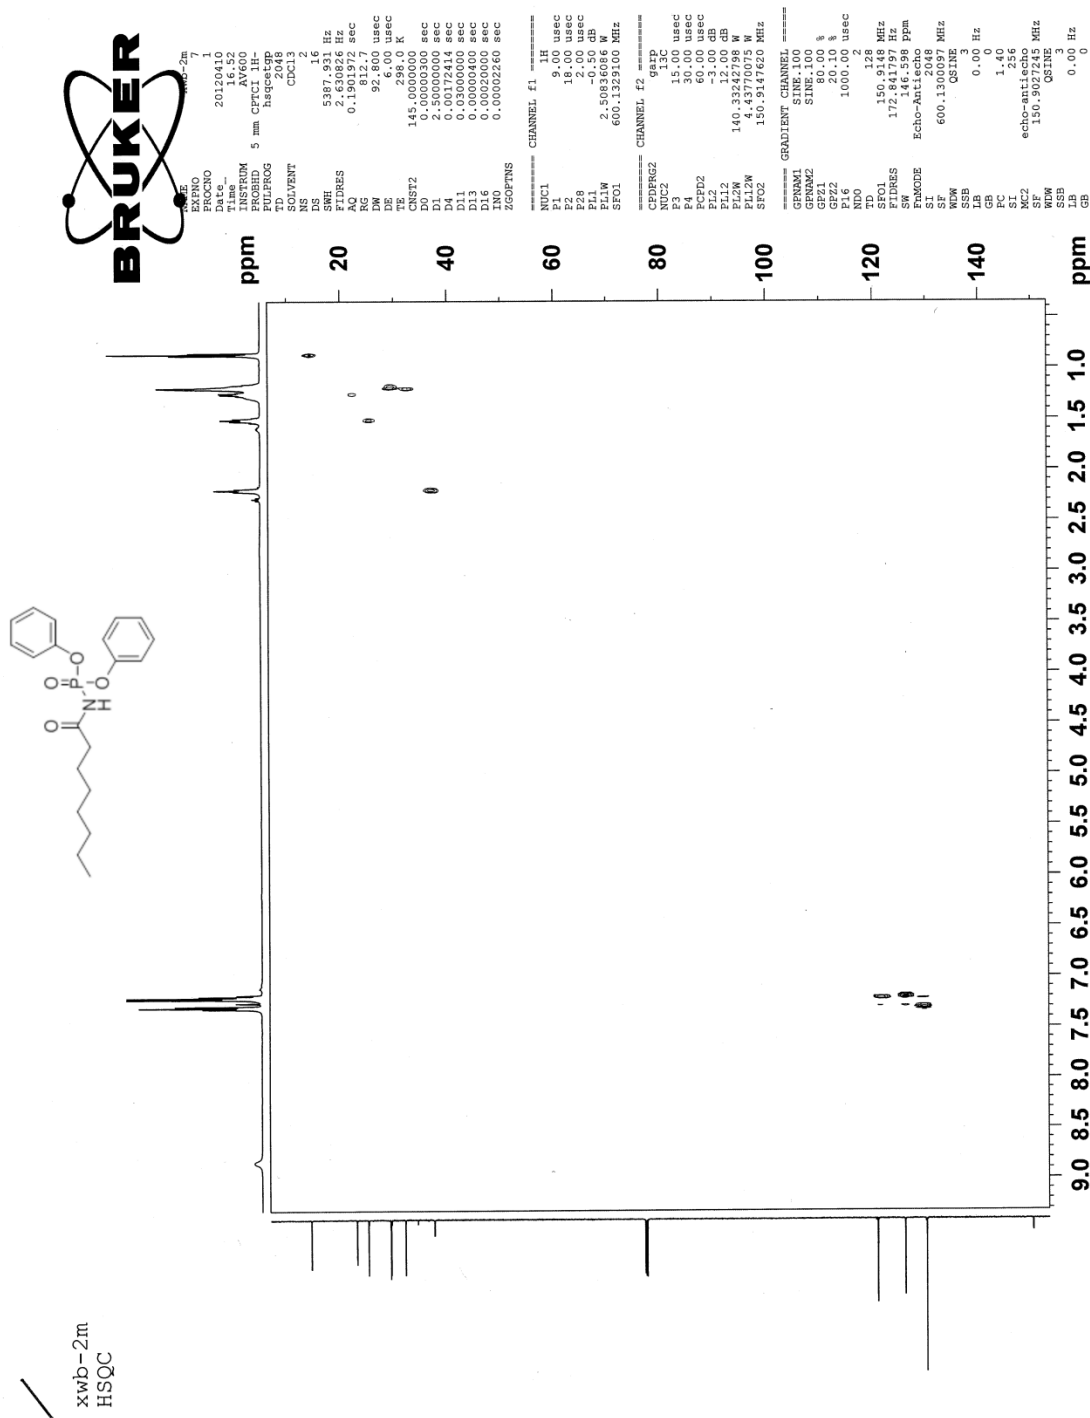

Diphenyl (3-phenylpropanoyl)phosphoramidate 2n

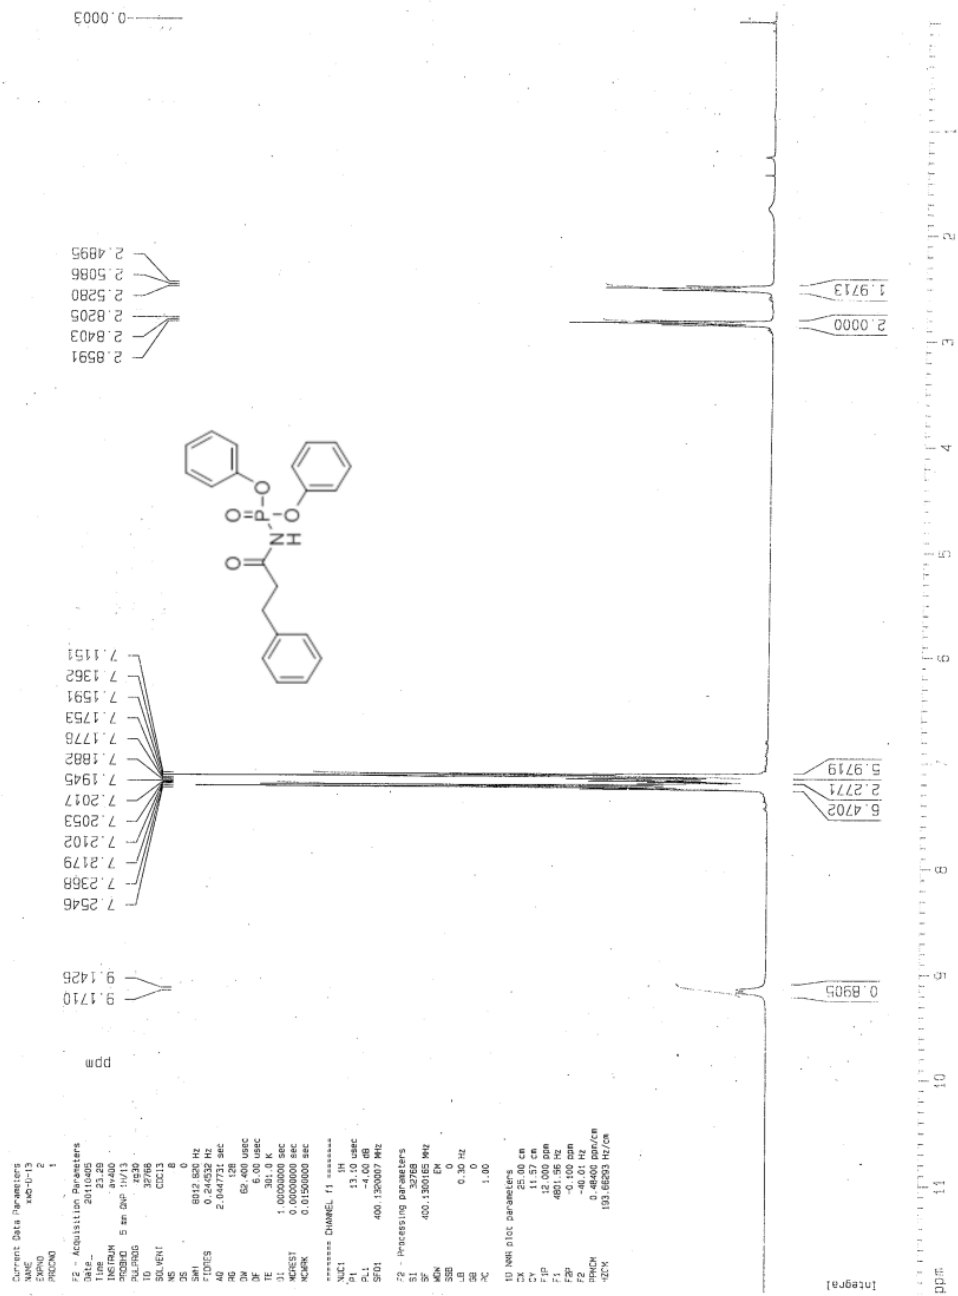

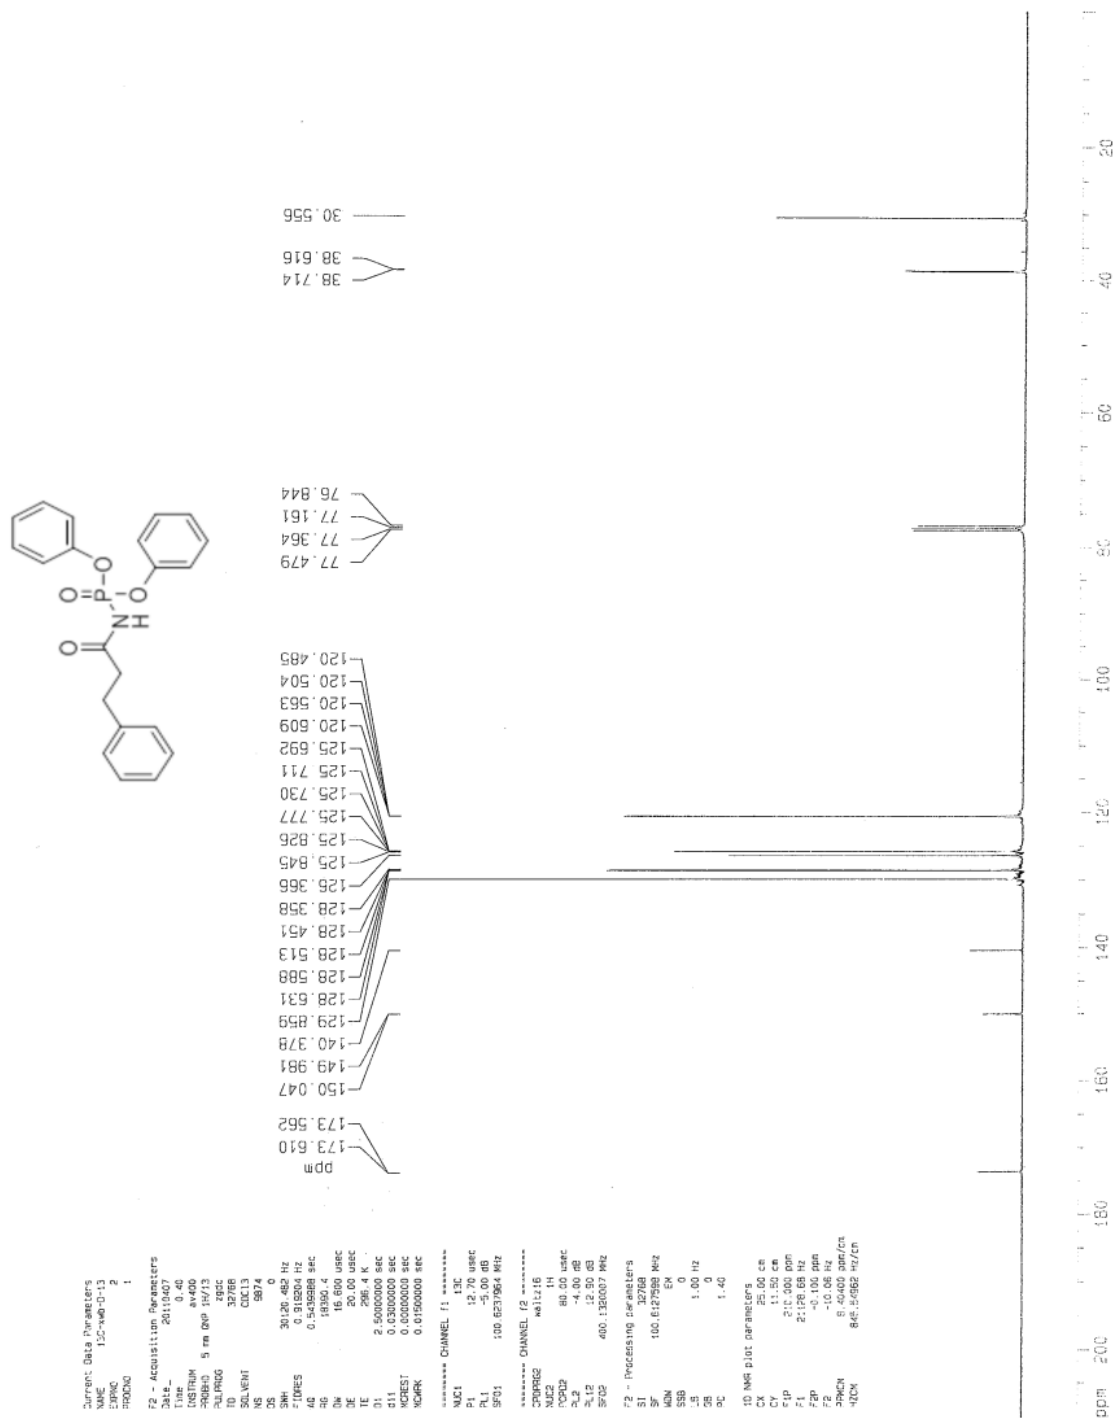



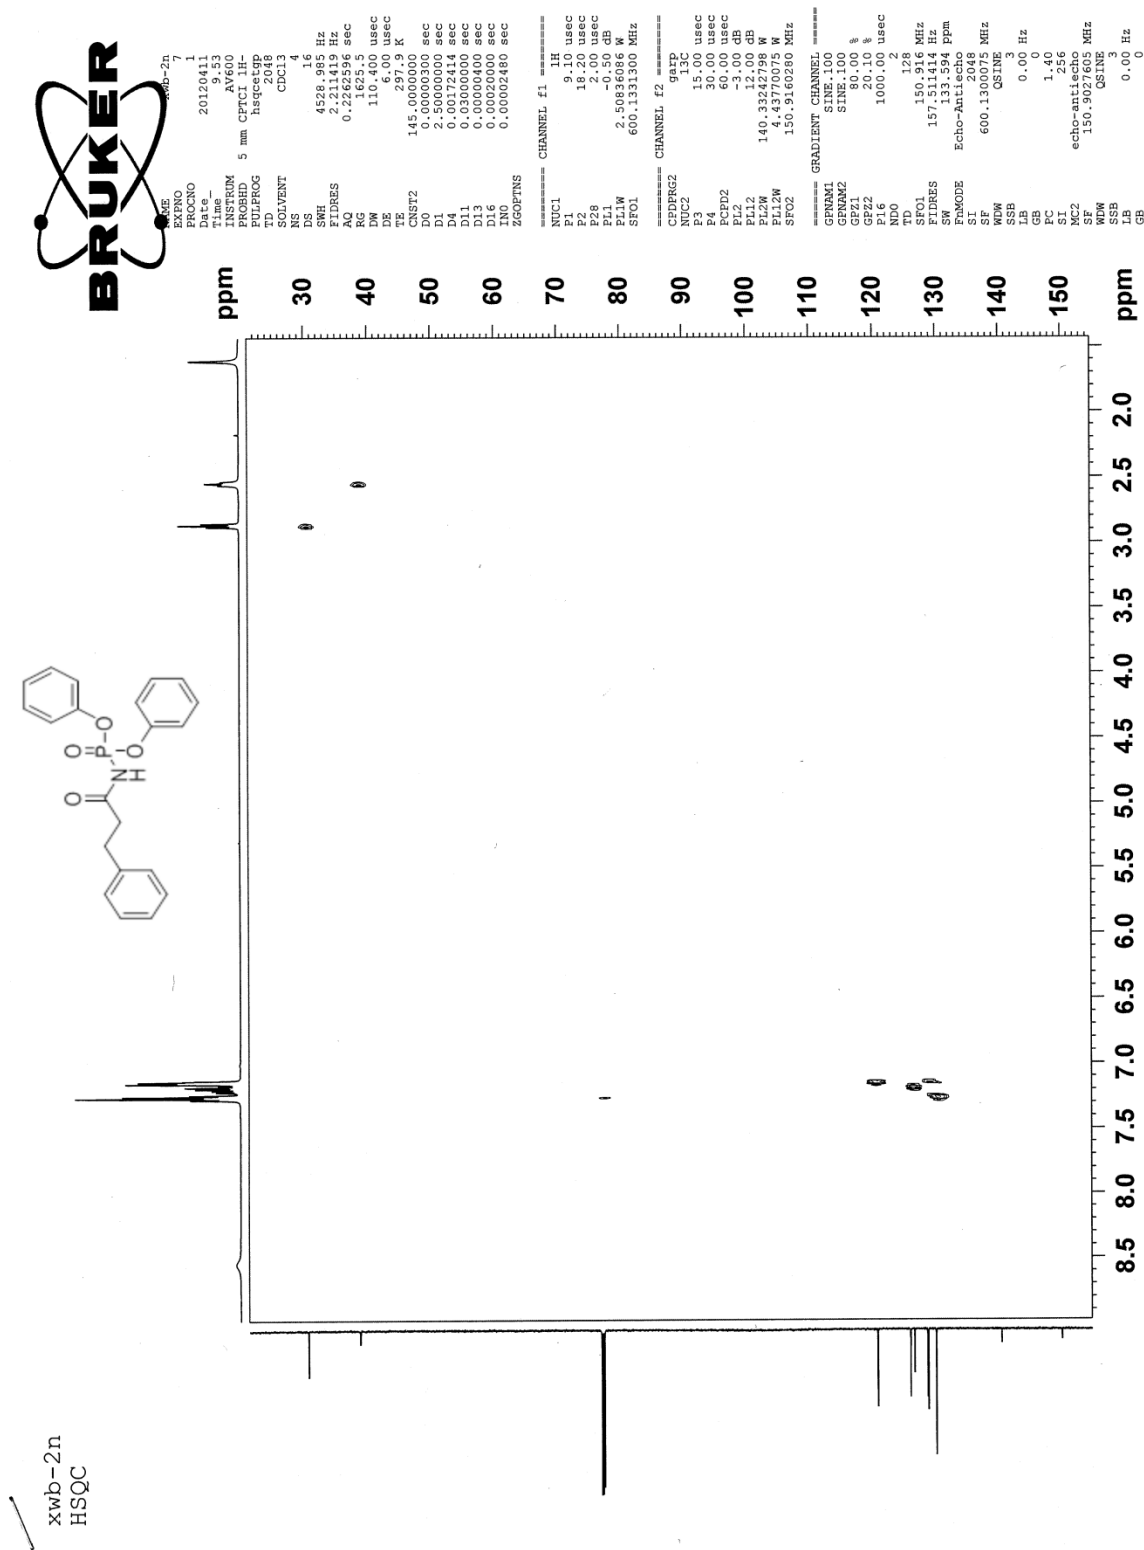



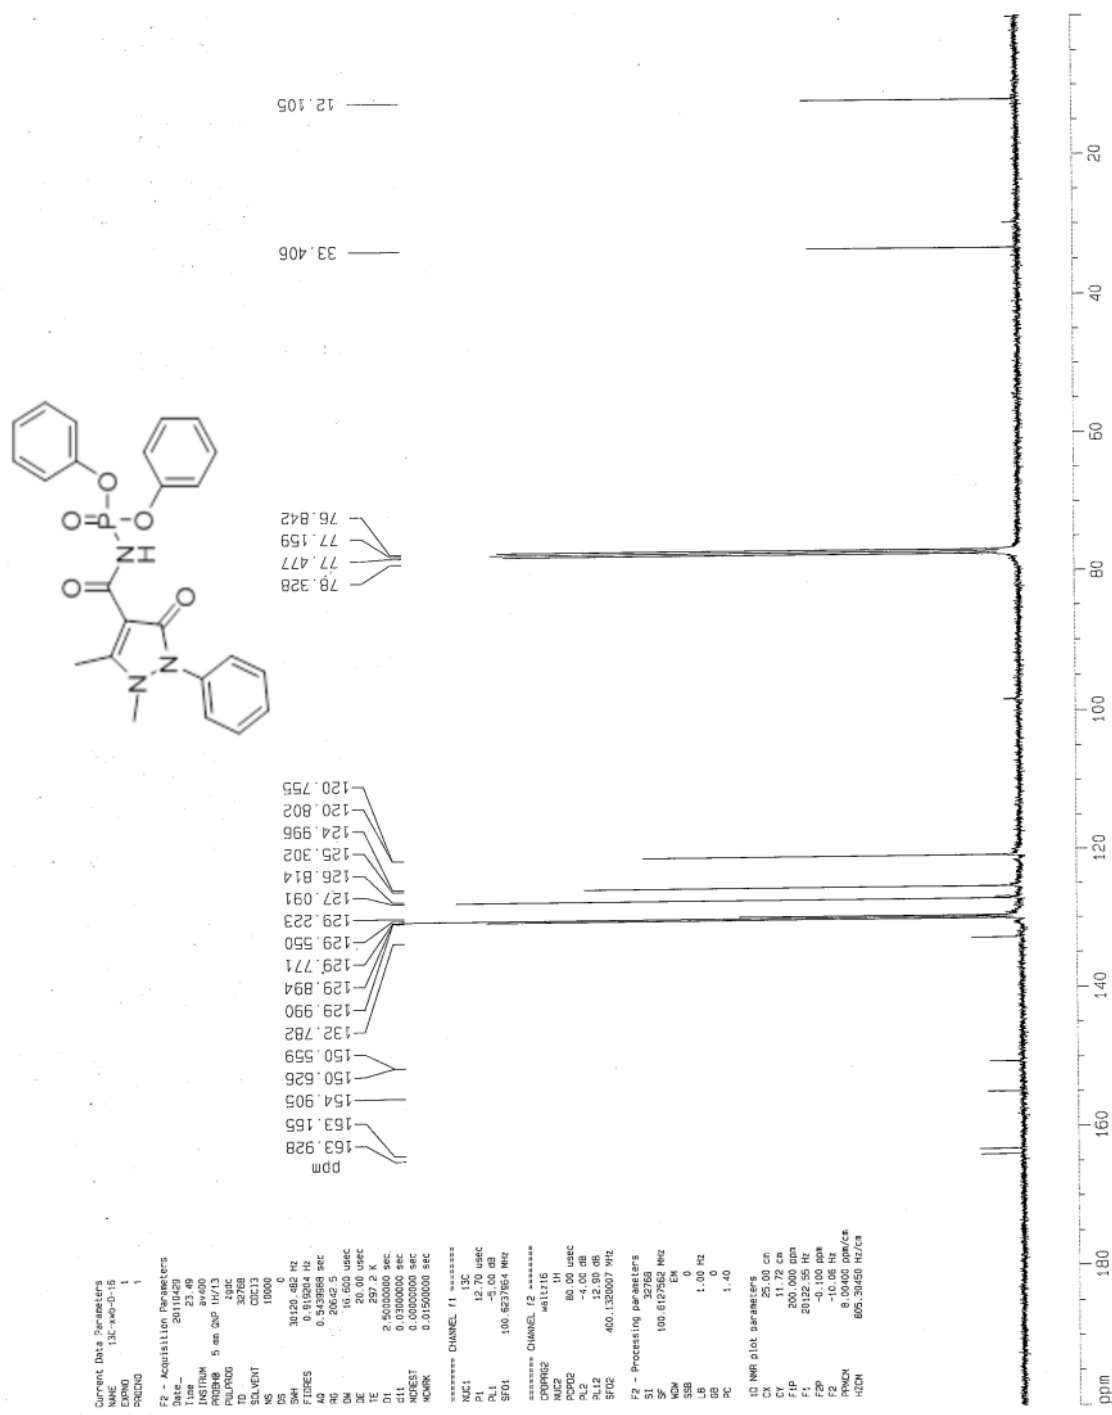

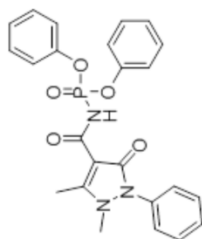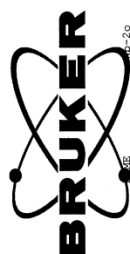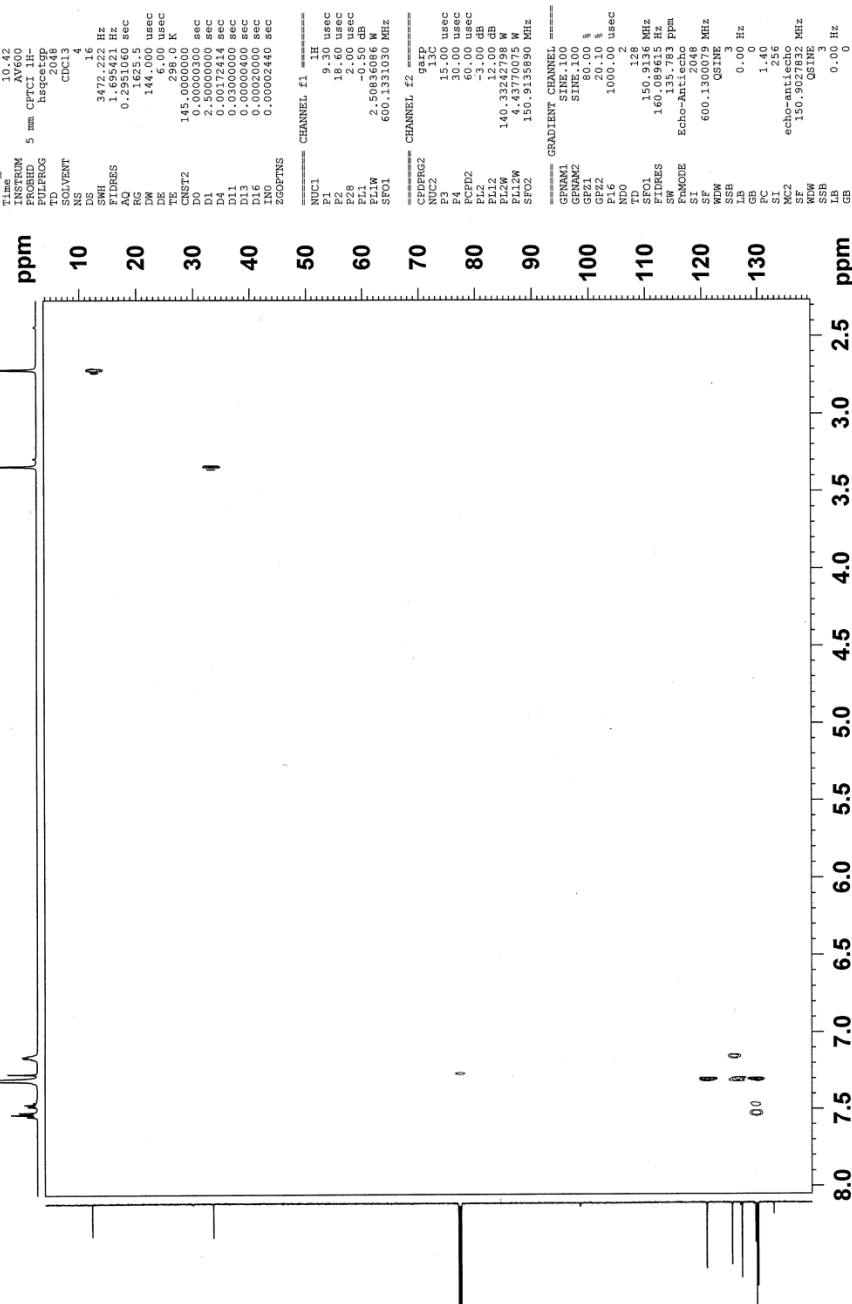

Dimethyl (4-methylbenzoyl)phosphoramidate 2p

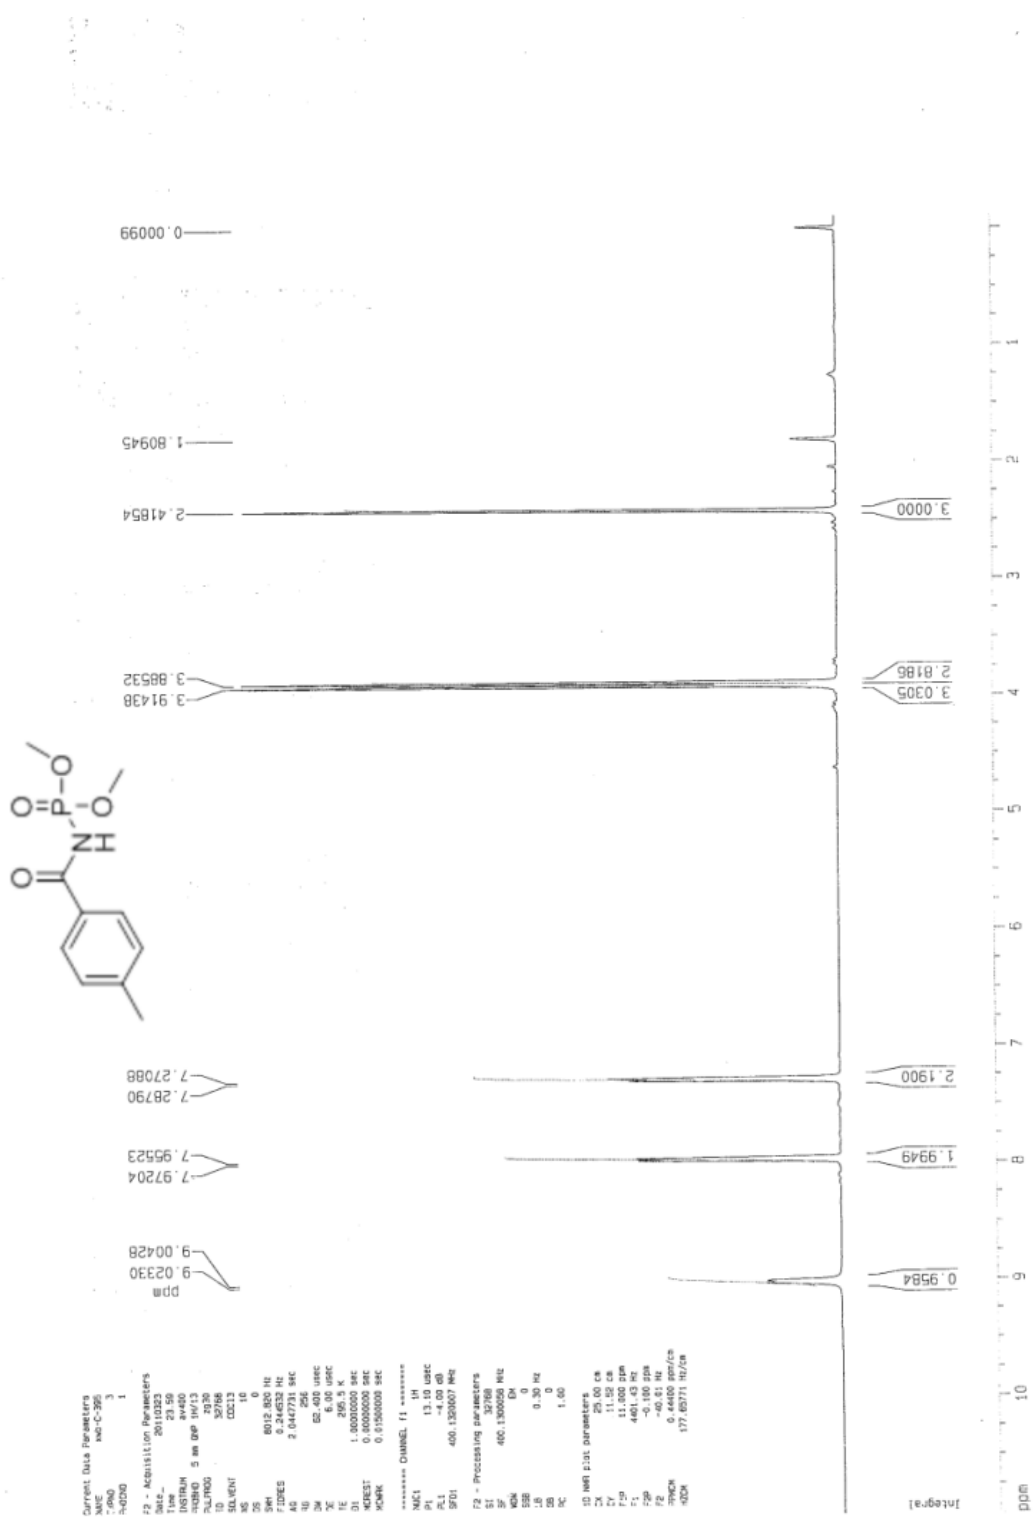

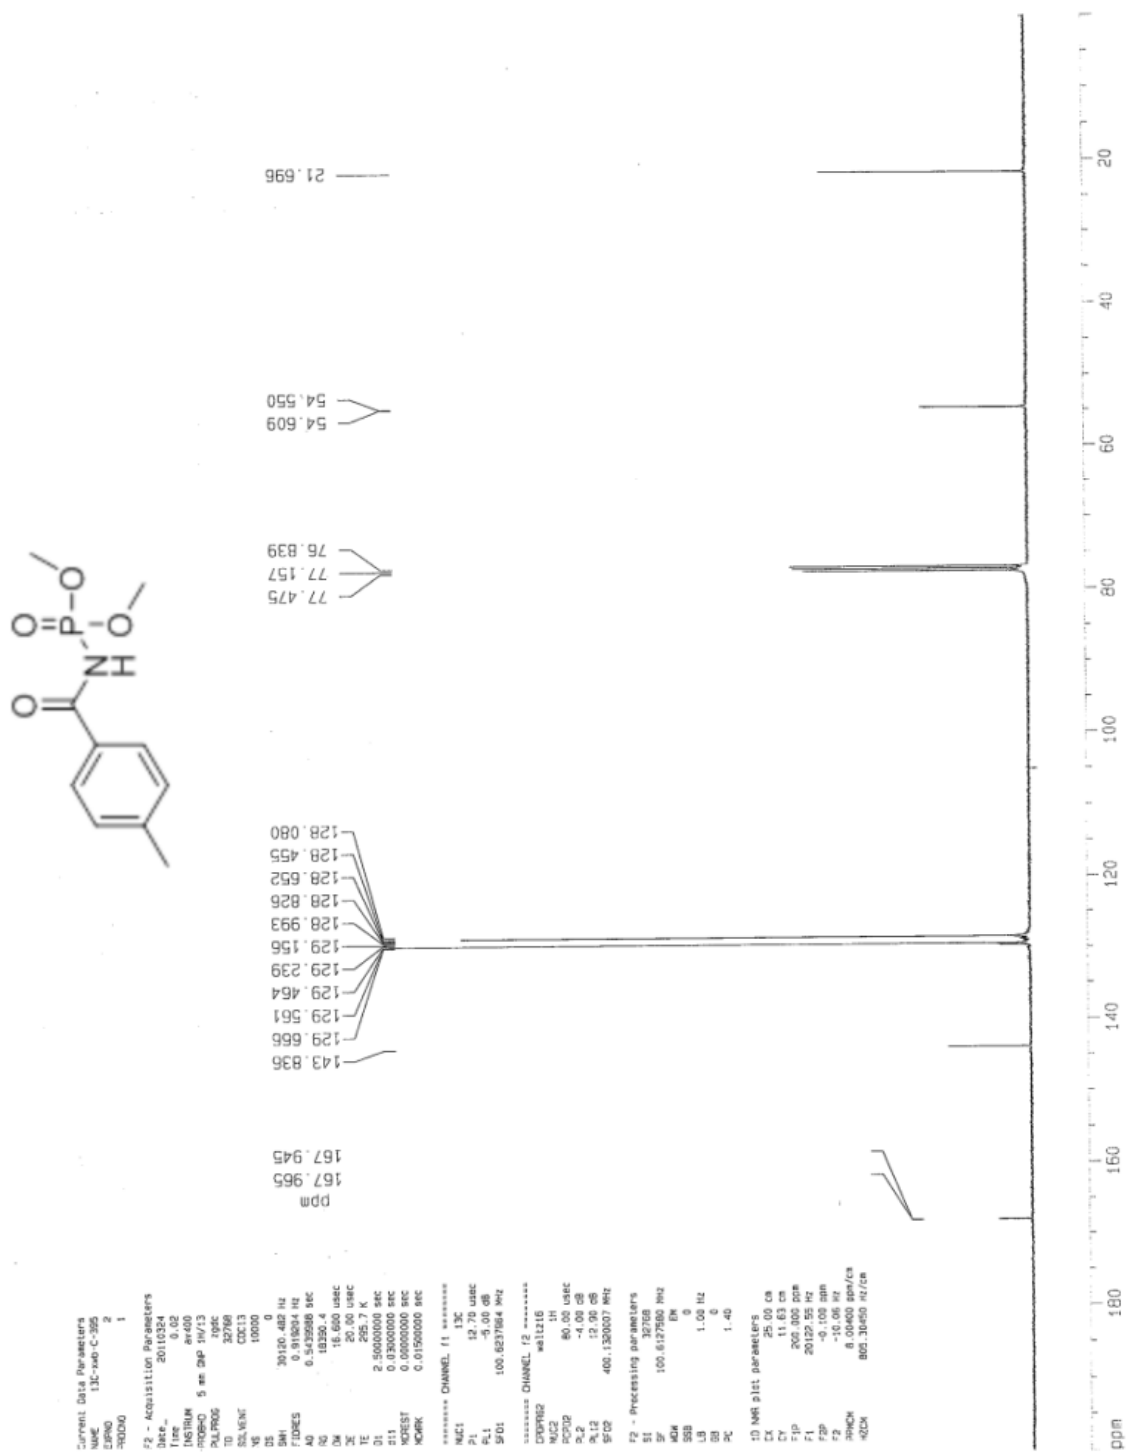

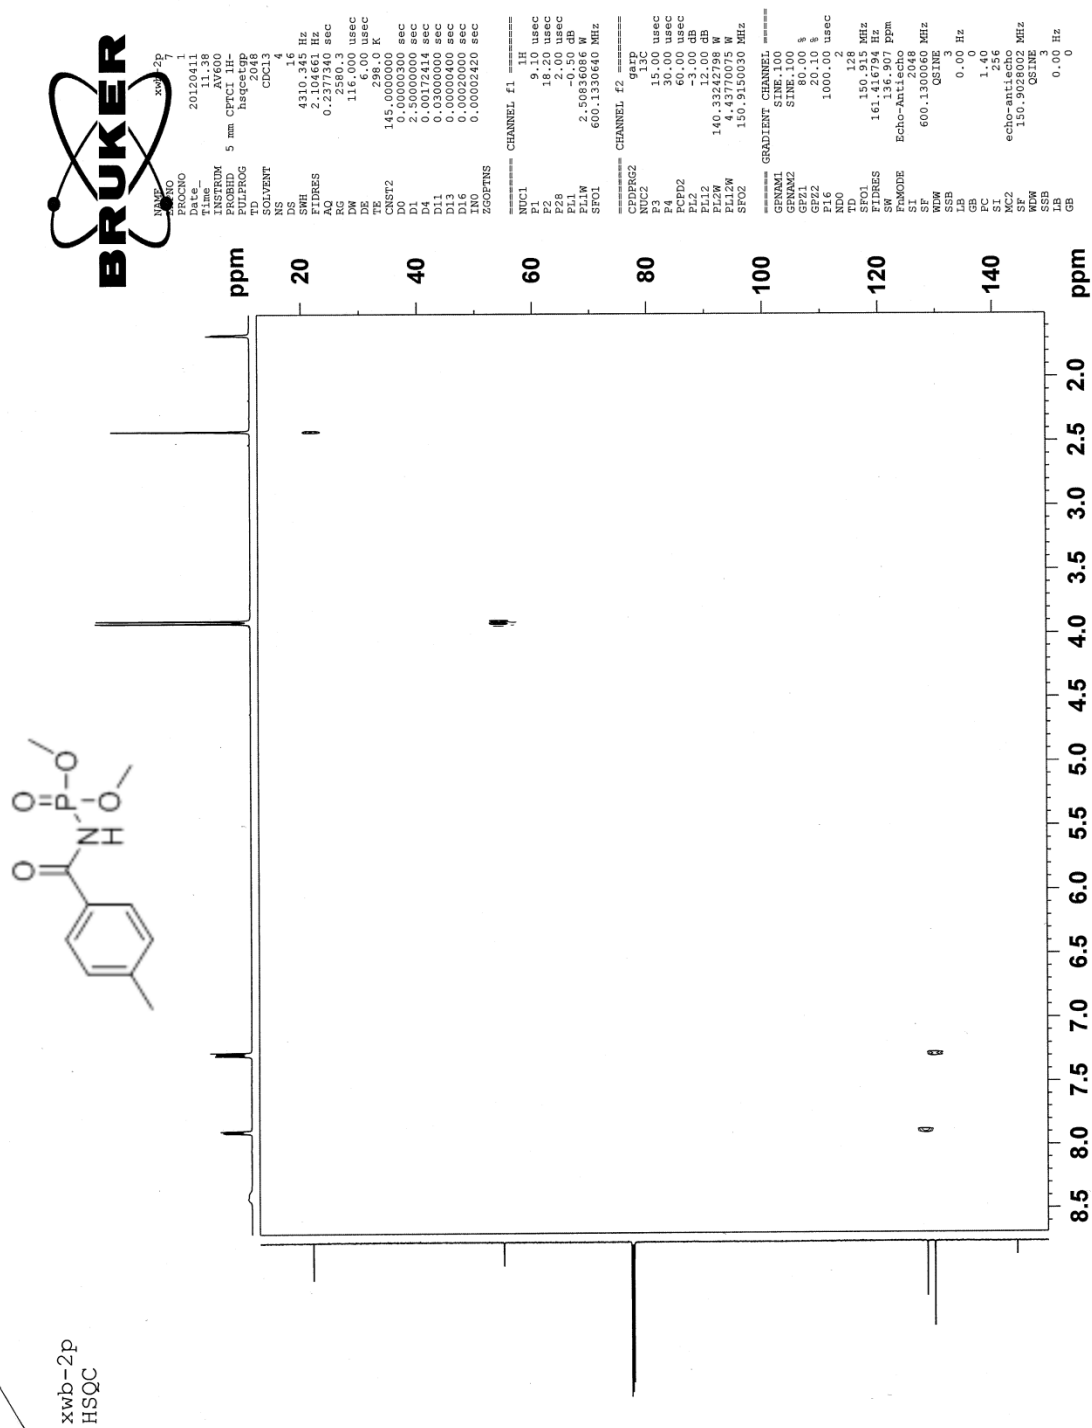





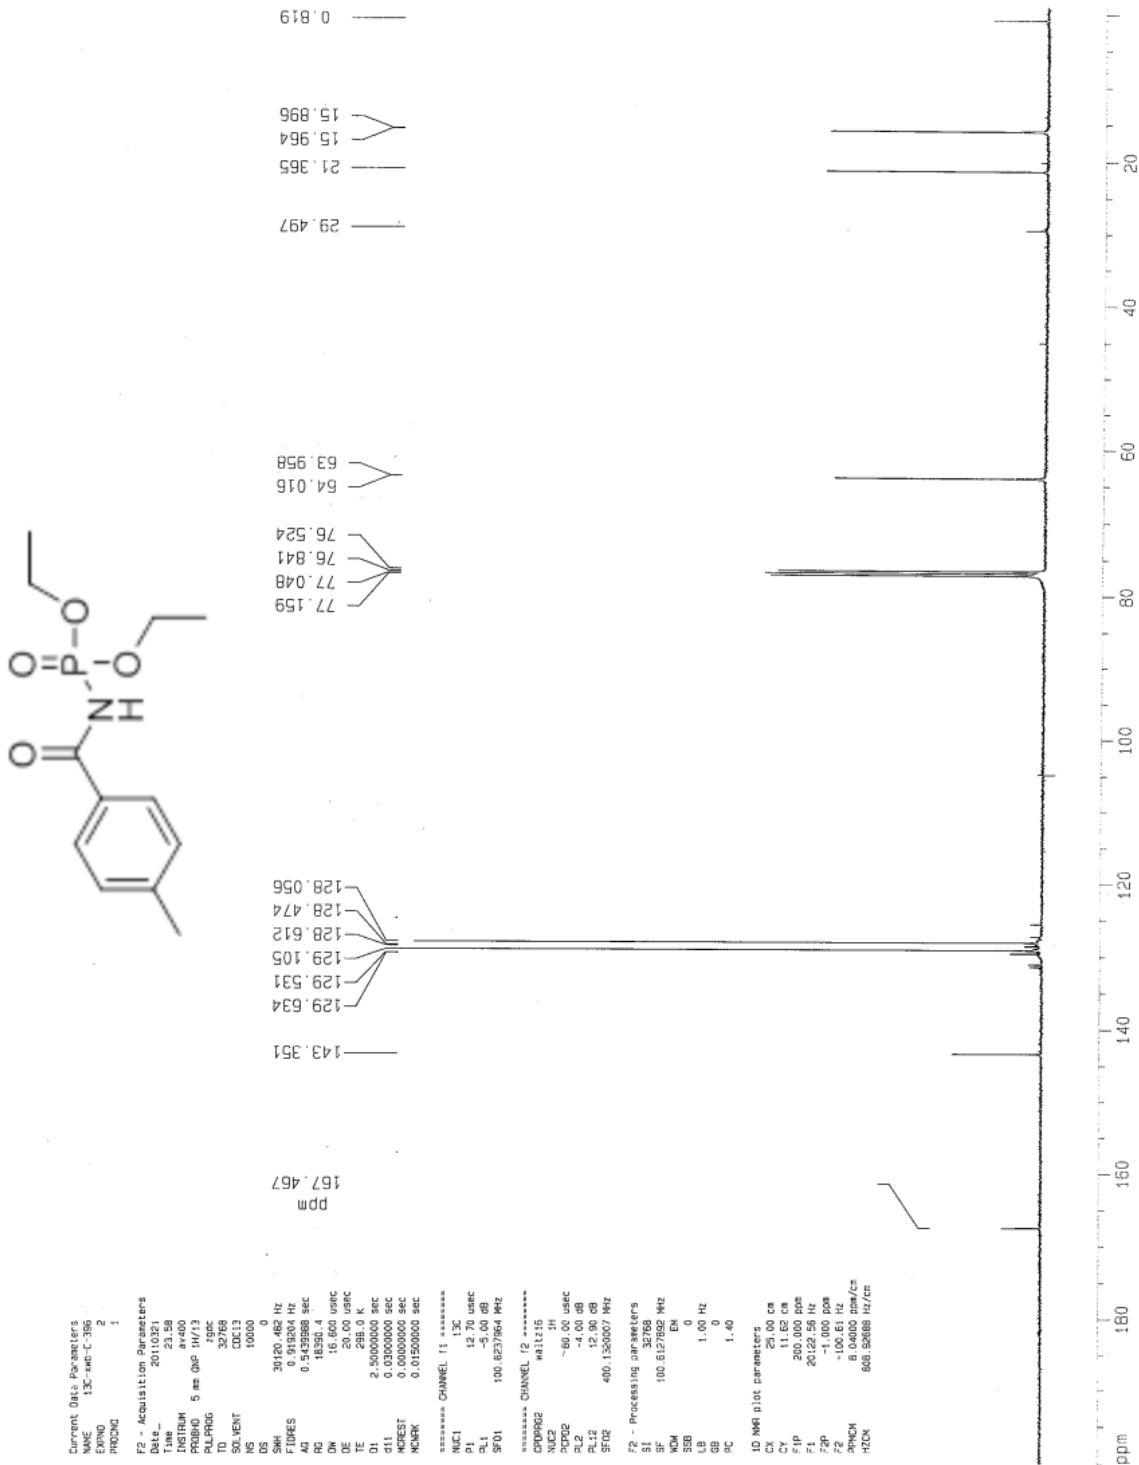

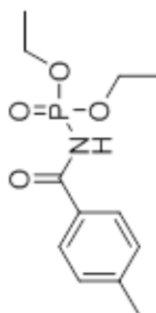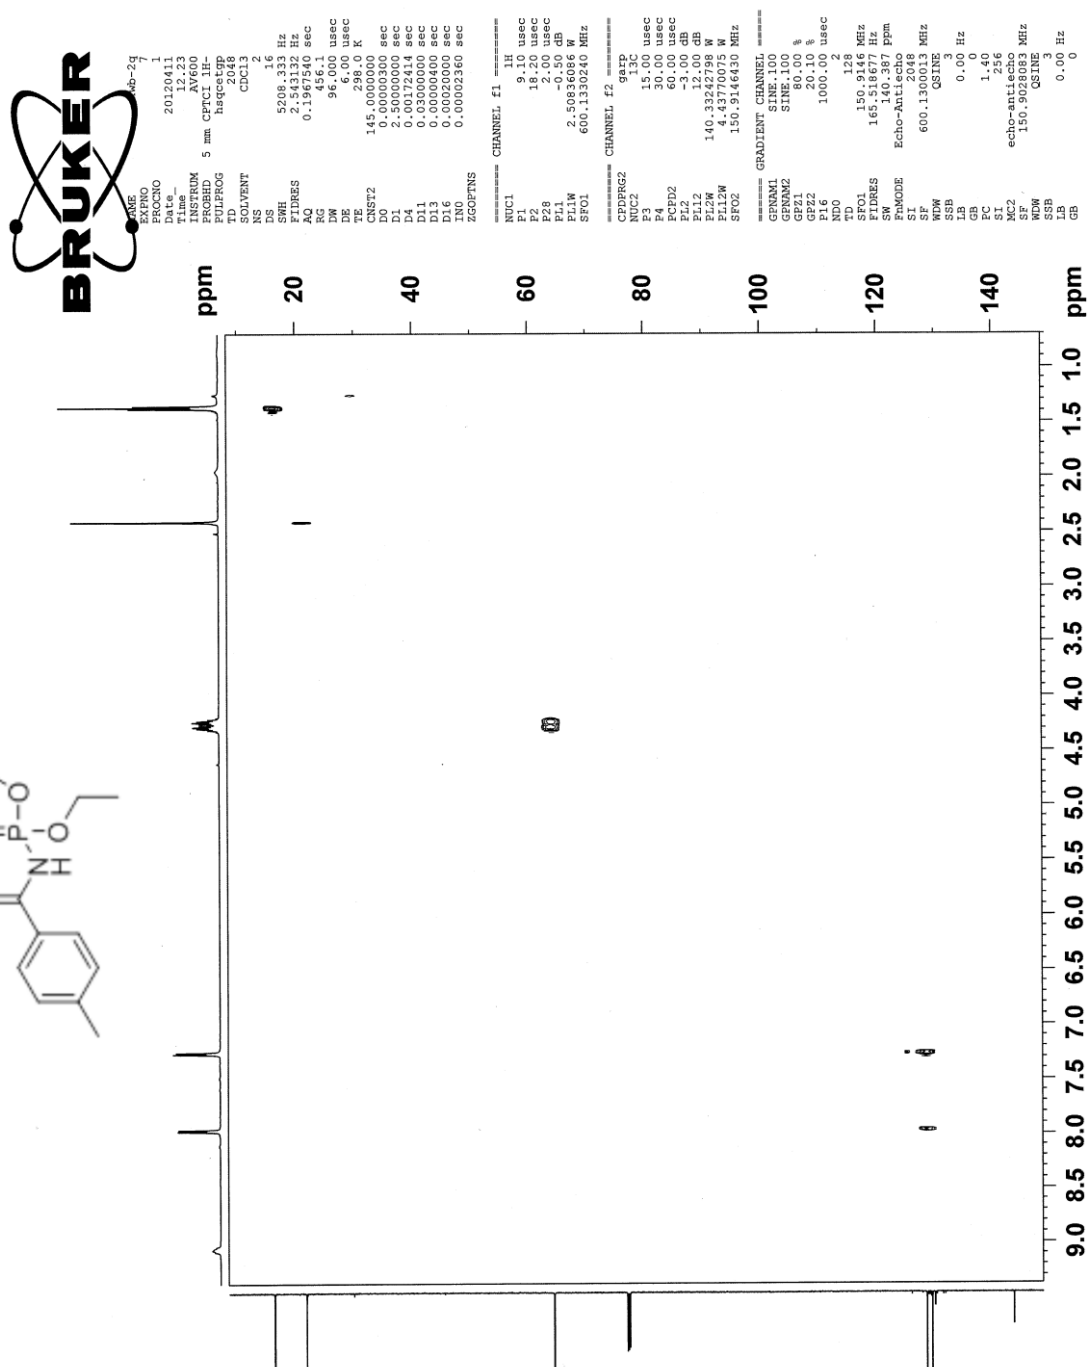

Bis(2,2,2-trichloroethyl) (4-methylbenzoyl)phosphoramidate 2r

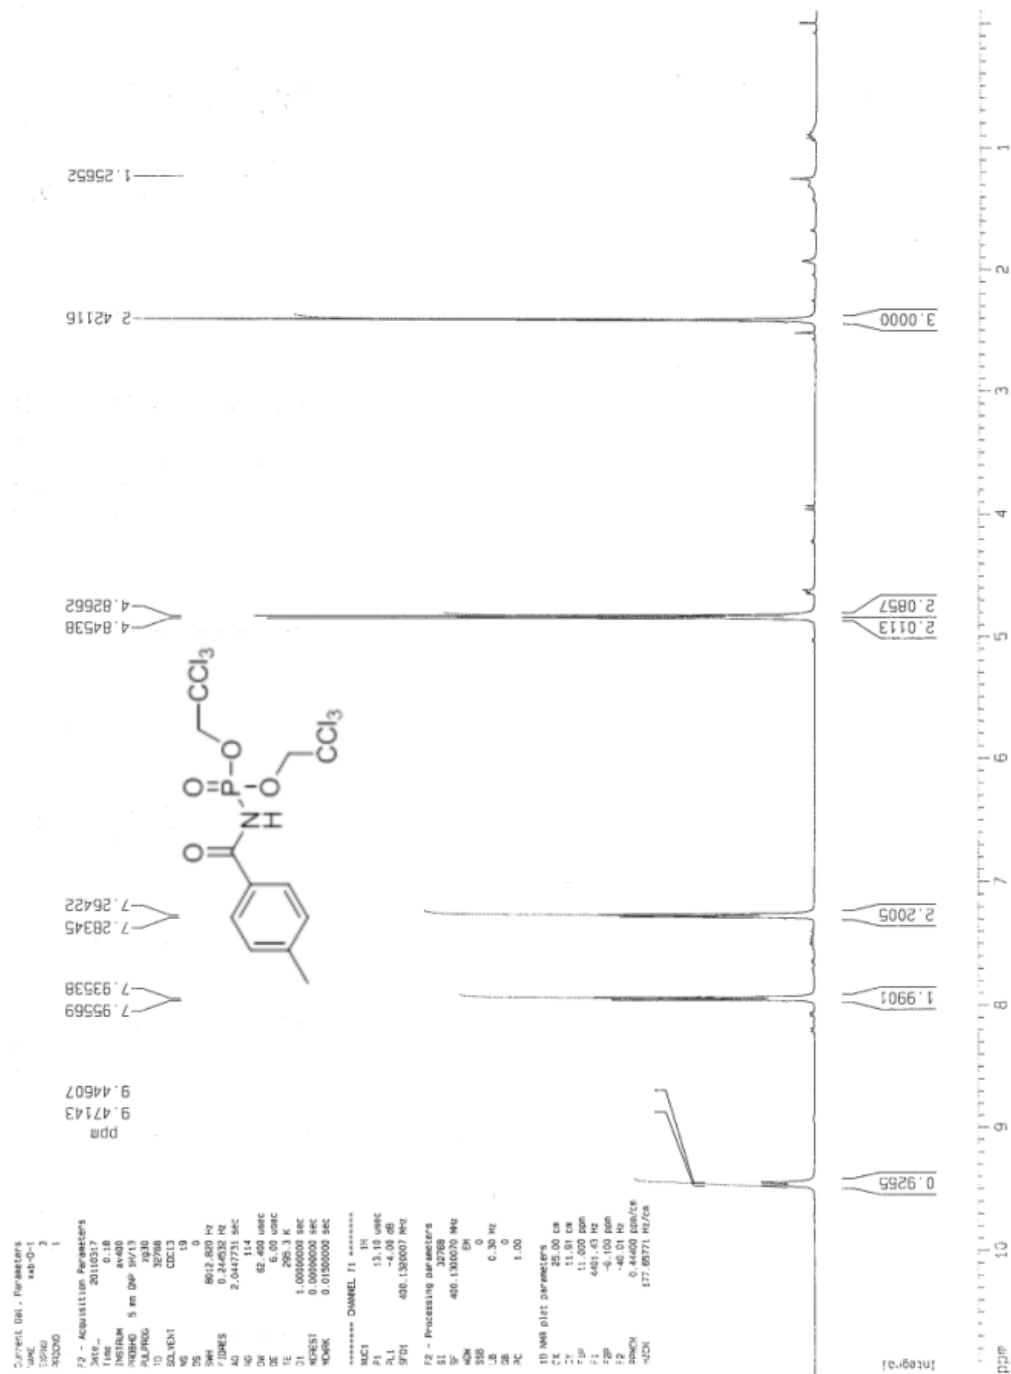

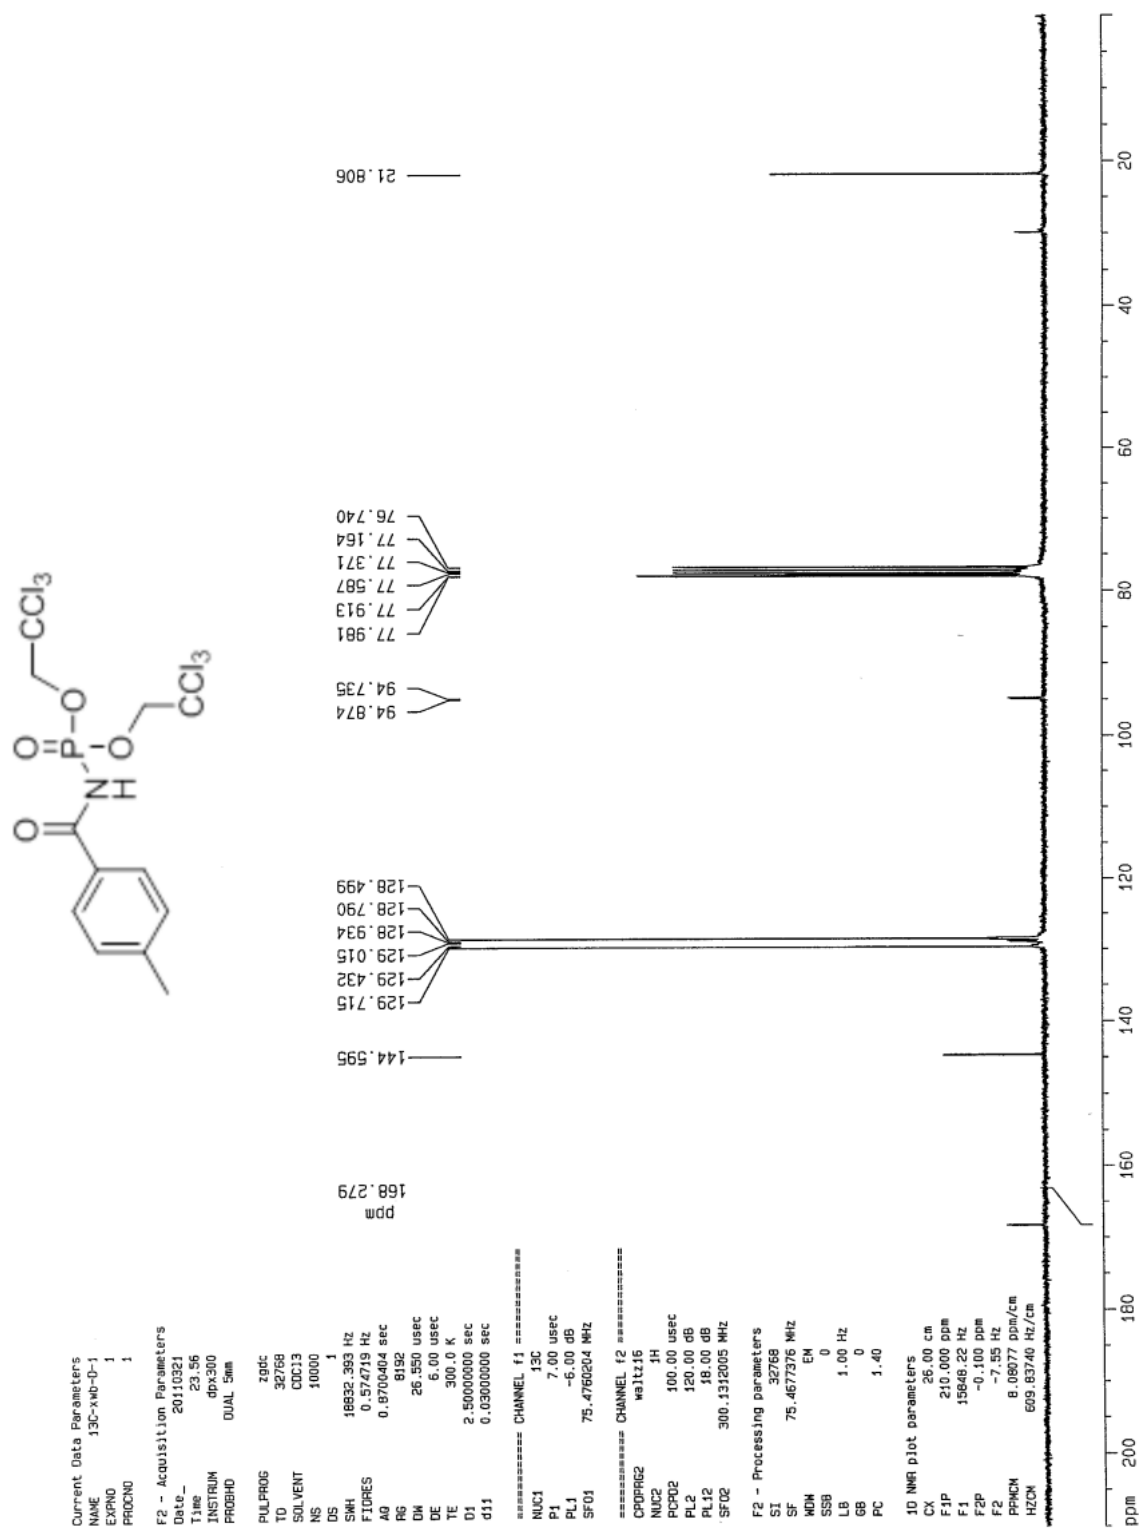

Bis(4-nitrophenyl) (4-methylbenzoyl)phosphoramidate 2s

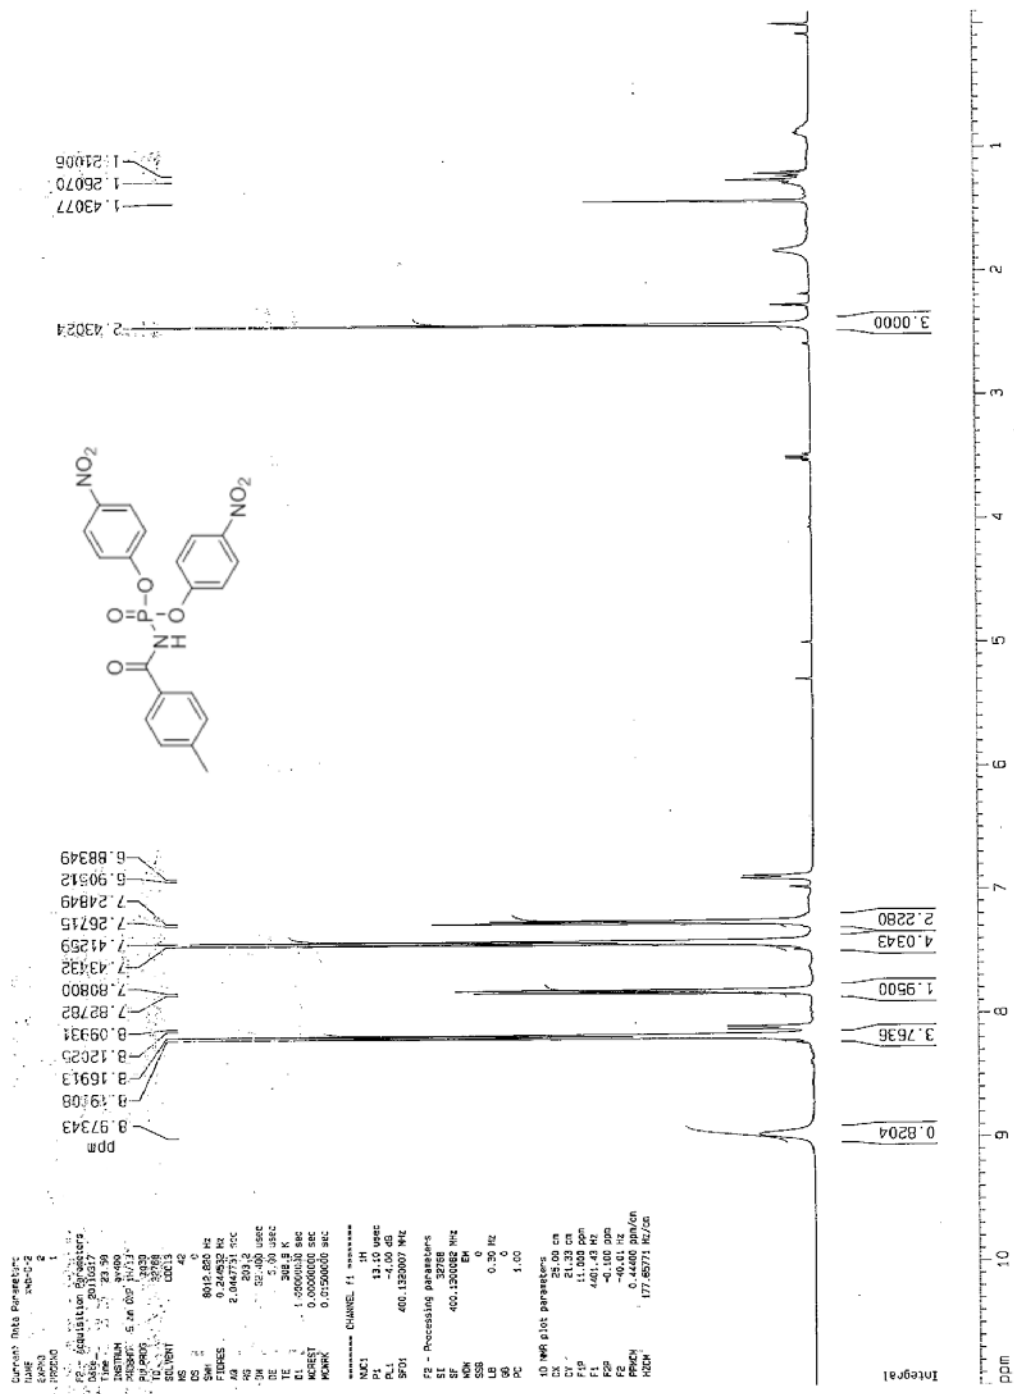

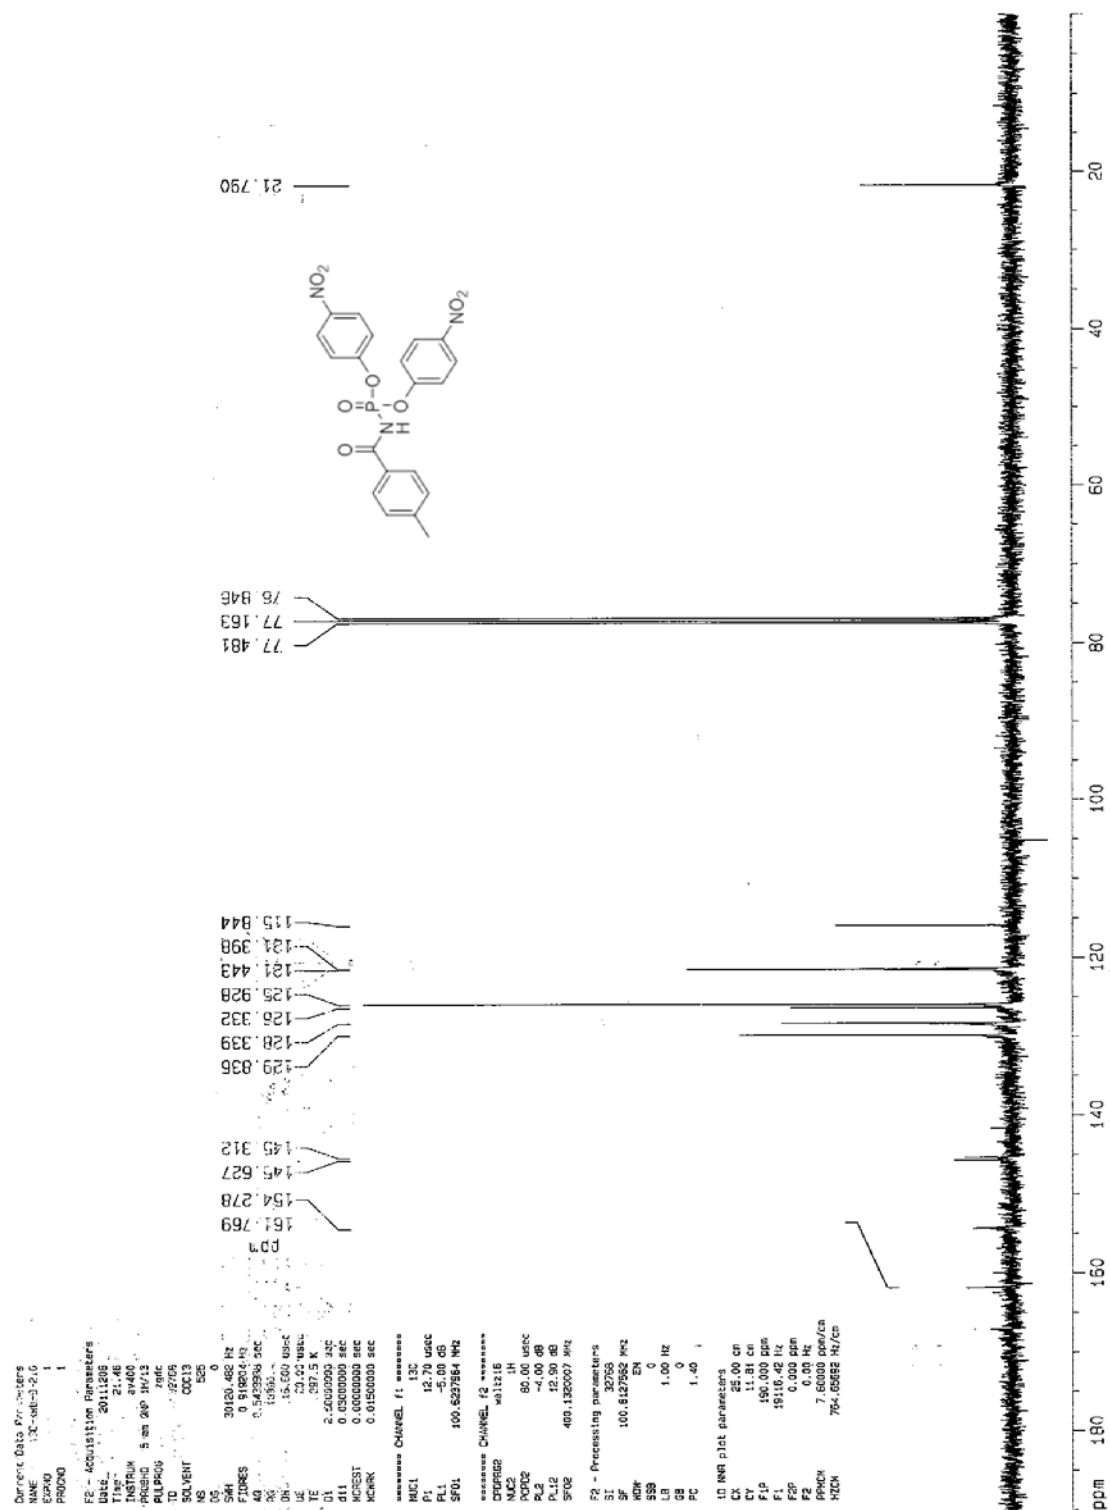

Bis(2,2,2-trichloroethyl) benzoylphosphoramidate 2t

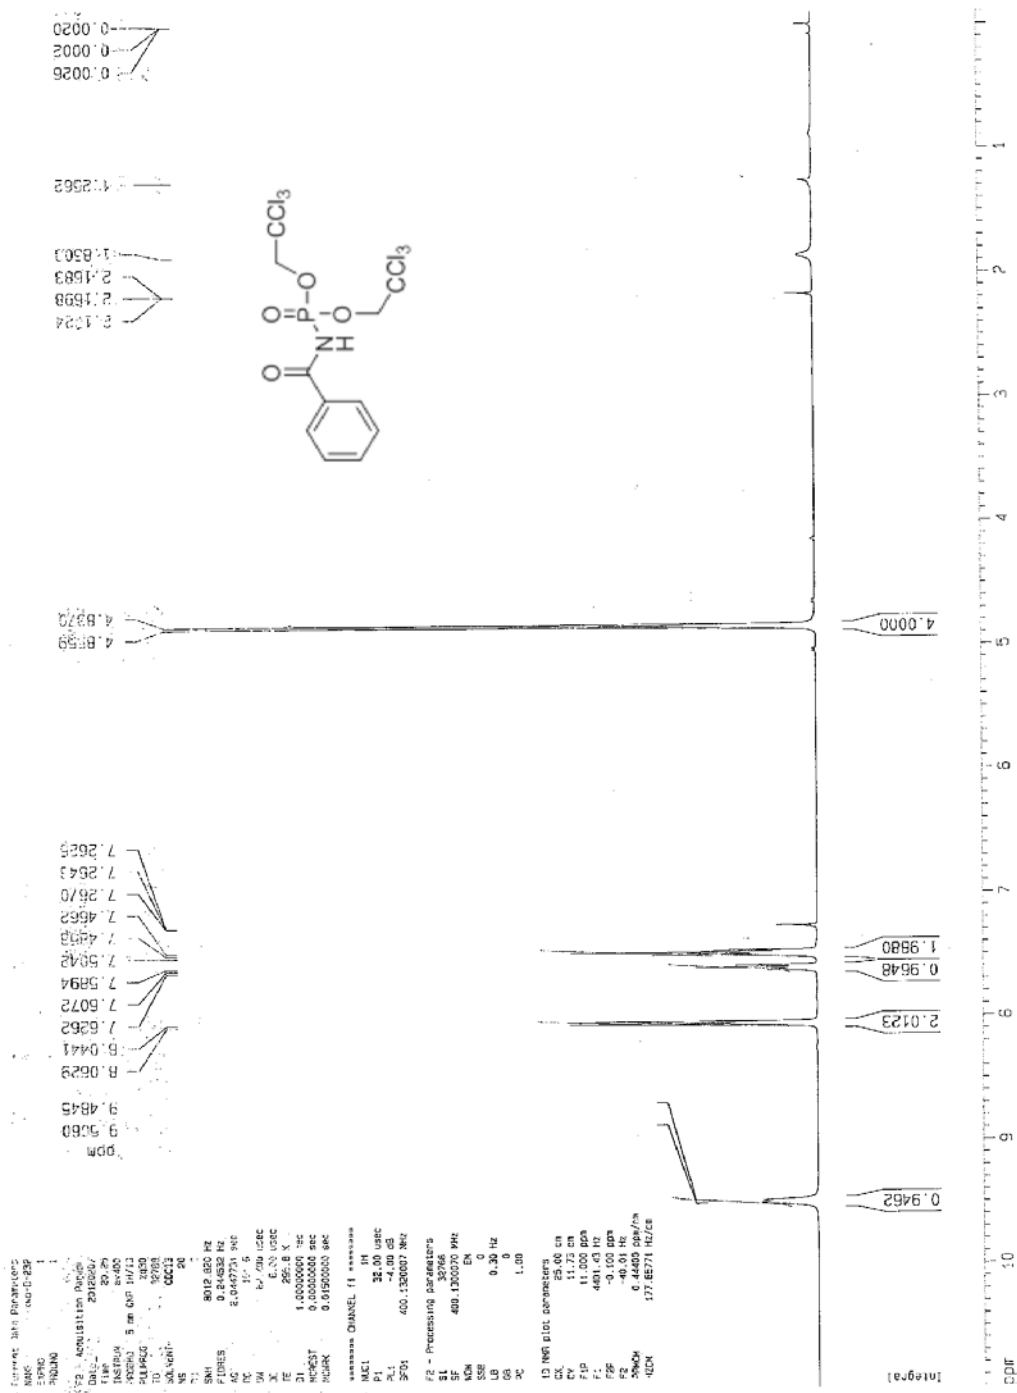

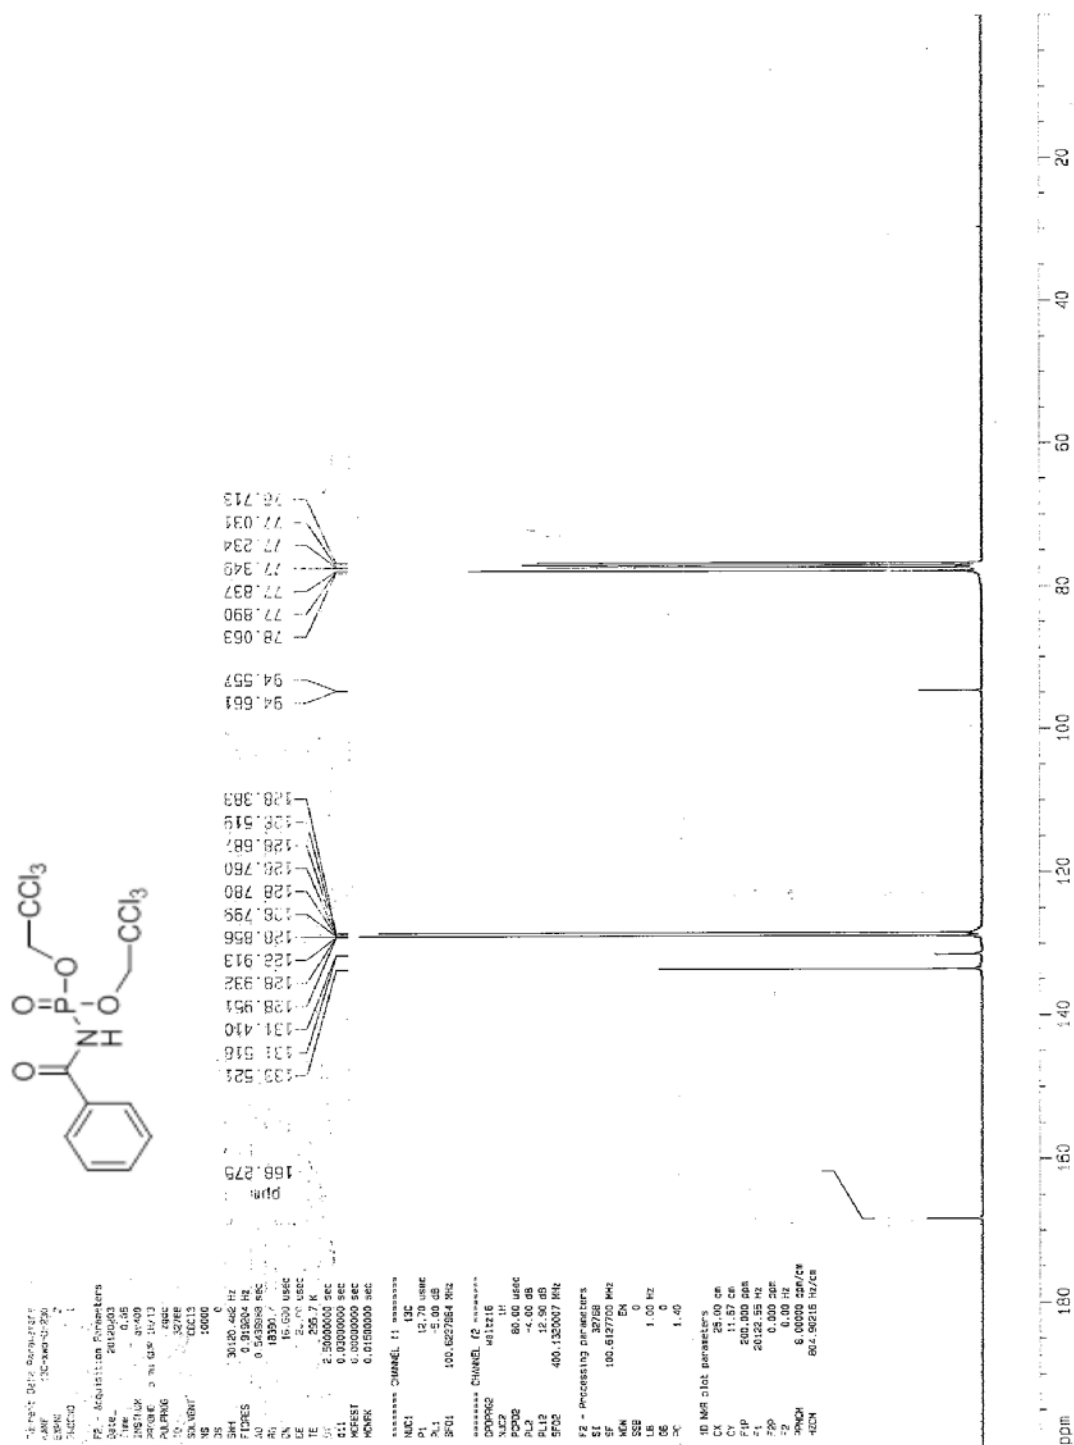

Supplement: c2cc31686b.pdf [file c2cc31686b.pdf]
